# Supplementary material
Source: PubMed Central journal article supplement (PMC9256789)
Supplement: NIHMS1817931-supplement-1.pdf [file NIHMS1817931-supplement-1.pdf]

# Appendix: Life expectancy by county, race, and ethnicity in the USA, 2000–2019: a systematic analysis of health disparities

## Contents

|                                                                                         |    |
|-----------------------------------------------------------------------------------------|----|
| 1 GATHER Checklist.....                                                                 | 3  |
| 2 Supplemental Methods.....                                                             | 4  |
| 2.1 Deaths and population data processing .....                                         | 4  |
| 2.2 Covariate imputation and smoothing .....                                            | 4  |
| 2.3 Small area model specification .....                                                | 8  |
| County-race/ethnicity model.....                                                        | 8  |
| County-level model .....                                                                | 12 |
| Hyper-prior sensitivity analysis.....                                                   | 12 |
| 2.4 Small area model validation.....                                                    | 13 |
| Approach.....                                                                           | 13 |
| Results.....                                                                            | 15 |
| 2.5 Derivation of misclassification ratios by county, age, sex, and race/ethnicity..... | 17 |
| Extraction .....                                                                        | 17 |
| Combination.....                                                                        | 17 |
| Mortality rate adjustment .....                                                         | 18 |
| Impact of misclassification adjustment and calibration .....                            | 18 |
| 2.6 Life table calculations.....                                                        | 20 |
| 2.7 References .....                                                                    | 22 |
| 3 Supplemental Methods Tables .....                                                     | 24 |
| 3.1 Counties combined to create historically stable units of analysis.....              | 24 |
| 3.2 Deaths and population data sources .....                                            | 25 |
| 3.3 Covariate data sources.....                                                         | 26 |
| 3.4 Population and uncertainty mask .....                                               | 29 |
| Population and uncertainty mask, by census region .....                                 | 29 |
| Population and uncertainty mask, by 2013 NCHS urban-rural classification .....          | 30 |
| 3.5 Hyper-parameter posterior means and standard errors .....                           | 33 |

|                                                                                                                                   |    |
|-----------------------------------------------------------------------------------------------------------------------------------|----|
| 3.6 County-racial/ethnic groups in the validation set .....                                                                       | 35 |
| 3.7 Validation results for life expectancy at birth for all models and racial/ethnic groups .....                                 | 40 |
| 4 Supplemental Methods Figures .....                                                                                              | 42 |
| 4.1 Analysis flow chart .....                                                                                                     | 42 |
| 4.2 Hyper-prior sensitivity analysis results .....                                                                                | 43 |
| 4.3 Model validation results .....                                                                                                | 45 |
| 4.4 Impact of misclassification adjustment on national life expectancy estimates .....                                            | 46 |
| 4.5 Impact of misclassification adjustment on county life expectancy estimates .....                                              | 47 |
| 5 Supplemental Results Figures .....                                                                                              | 48 |
| 5.1 County life expectancy by racial/ethnic group, 2000 .....                                                                     | 48 |
| 5.2 County life expectancy by racial/ethnic group, 2010 .....                                                                     | 50 |
| 5.3 Differences in county life expectancy among racial/ethnic groups compared to the White population, 2000.....                  | 51 |
| 5.4 Differences in county life expectancy among racial/ethnic groups compared to the White population, 2010.....                  | 52 |
| 5.5 Change in county life expectancy by racial/ethnic group, 2000–2010.....                                                       | 53 |
| 5.6 Change in county life expectancy by racial/ethnic group, 2010–2019.....                                                       | 55 |
| 5.7 Change in county life expectancy by racial/ethnic group compared to the White population, 2000–2010 .....                     | 57 |
| 5.8 Change in county life expectancy by racial/ethnic group compared to the White population, 2010–2019 .....                     | 59 |
| 5.9 Change in differences in county life expectancy among racial/ethnic groups compared to the White population, 2000–2010 .....  | 61 |
| 5.10 Change in differences in county life expectancy among racial/ethnic groups compared to the White population, 2010–2019 ..... | 63 |
| 5.11 County life expectancy and the composition of the API population .....                                                       | 65 |

1 **1 GATHER Checklist**

2

| Item #                                                                                                | Checklist item                                                                                                                                                                                                                                                                                                                                                                            | Description of Compliance                                    |
|-------------------------------------------------------------------------------------------------------|-------------------------------------------------------------------------------------------------------------------------------------------------------------------------------------------------------------------------------------------------------------------------------------------------------------------------------------------------------------------------------------------|--------------------------------------------------------------|
| <b>Objectives and funding</b>                                                                         |                                                                                                                                                                                                                                                                                                                                                                                           |                                                              |
| 1                                                                                                     | Define the indicator(s), populations (including age, sex, and geographic entities), and time period(s) for which estimates were made.                                                                                                                                                                                                                                                     | Abstract, Introduction, and Methods sections                 |
| 2                                                                                                     | List the funding sources for the work.                                                                                                                                                                                                                                                                                                                                                    | Abstract, Methods, and Acknowledgements sections             |
| <b>Data Inputs</b>                                                                                    |                                                                                                                                                                                                                                                                                                                                                                                           |                                                              |
| <i>For all data inputs from multiple sources that are synthesized as part of the study:</i>           |                                                                                                                                                                                                                                                                                                                                                                                           |                                                              |
| 3                                                                                                     | Describe how the data were identified and how the data were accessed.                                                                                                                                                                                                                                                                                                                     | Methods section                                              |
| 4                                                                                                     | Specify the inclusion and exclusion criteria. Identify all ad-hoc exclusions.                                                                                                                                                                                                                                                                                                             | Methods section                                              |
| 5                                                                                                     | Provide information on all included data sources and their main characteristics. For each data source used, report reference information or contact name/institution, population represented, data collection method, year(s) of data collection, sex and age range, diagnostic criteria or measurement method, and sample size, as relevant.                                             | Methods section, Appendix sections 2.1–2.2, 2.5, and 3.2–3.3 |
| 6                                                                                                     | Identify and describe any categories of input data that have potentially important biases (e.g., based on characteristics listed in item 5).                                                                                                                                                                                                                                              | Methods section                                              |
| <i>For data inputs that contribute to the analysis but were not synthesized as part of the study:</i> |                                                                                                                                                                                                                                                                                                                                                                                           |                                                              |
| 7                                                                                                     | Describe and give sources for any other data inputs.                                                                                                                                                                                                                                                                                                                                      | N/A                                                          |
| <i>For all data inputs:</i>                                                                           |                                                                                                                                                                                                                                                                                                                                                                                           |                                                              |
| 8                                                                                                     | Provide all data inputs in a file format from which data can be efficiently extracted (e.g., a spreadsheet rather than a PDF), including all relevant meta-data listed in item 5. For any data inputs that cannot be shared because of ethical or legal reasons, such as third-party ownership, provide a contact name or the name of the institution that retains the right to the data. | GHDx link (upon publication)                                 |
| <b>Data analysis</b>                                                                                  |                                                                                                                                                                                                                                                                                                                                                                                           |                                                              |
| 9                                                                                                     | Provide a conceptual overview of the data analysis method. A diagram may be helpful.                                                                                                                                                                                                                                                                                                      | Methods section, Appendix section 4.1                        |
| 10                                                                                                    | Provide a detailed description of all steps of the analysis, including mathematical formulae. This description should cover, as relevant, data cleaning, data pre-processing, data adjustments and weighting of data sources, and mathematical or statistical model(s).                                                                                                                   | Methods section, Appendix section 2                          |
| 11                                                                                                    | Describe how candidate models were evaluated and how the final model(s) were selected.                                                                                                                                                                                                                                                                                                    | Appendix section 2                                           |
| 12                                                                                                    | Provide the results of an evaluation of model performance, if done, as well as the results of any relevant sensitivity analysis.                                                                                                                                                                                                                                                          | Appendix section 2                                           |
| 13                                                                                                    | Describe methods for calculating uncertainty of the estimates. State which sources of uncertainty were, and were not, accounted for in the uncertainty analysis.                                                                                                                                                                                                                          | Methods section, Appendix section 2                          |
| 14                                                                                                    | State how analytic or statistical source code used to generate estimates can be accessed.                                                                                                                                                                                                                                                                                                 | GitHub link (upon publication)                               |
| <b>Results and Discussion</b>                                                                         |                                                                                                                                                                                                                                                                                                                                                                                           |                                                              |
| 15                                                                                                    | Provide published estimates in a file format from which data can be efficiently extracted.                                                                                                                                                                                                                                                                                                | GHDx link (upon publication)                                 |
| 16                                                                                                    | Report a quantitative measure of the uncertainty of the estimates (e.g. uncertainty intervals).                                                                                                                                                                                                                                                                                           | Results section, GHDx link (upon publication)                |
| 17                                                                                                    | Interpret results in light of existing evidence. If updating a previous set of estimates, describe the reasons for changes in estimates.                                                                                                                                                                                                                                                  | Introduction and Discussion sections                         |
| 18                                                                                                    | Discuss limitations of the estimates. Include a discussion of any modelling assumptions or data limitations that affect interpretation of the estimates.                                                                                                                                                                                                                                  | Discussion section                                           |

3

4 Checklist template obtained from: <http://gather-statement.org/>

## 5 2 Supplemental Methods

### 6 2.1 Deaths and population data processing

7 We used de-identified death records from the National Vital Statistics System (NVSS) and population  
8 estimates from the National Center for Health Statistics (NCHS) for the years 2000–2019 for this analysis  
9 (section 3.2). Deaths and population were tabulated by county, age group (0, 1–4, 5–9, ..., 80–84, 85+  
10 years of age), sex, race/ethnicity, and year. In cases where age was missing (0.0177% of deaths), we  
11 calculated the proportion of deaths within each age group by state, year, sex, and race/ethnicity among  
12 those entries with age information and then reapportioned deaths without age information by using  
13 these proportions. This approach effectively assumes that age is missing at random. We are unable to  
14 verify this assumption; however, we believe it's unlikely that violations of this assumption would  
15 substantively impact the results of our analysis, given the rarity of missing age in the deaths data. In cases  
16 where death records were missing information on race or where race was coded as "other" (0.63%),  
17 NVSS imputed a value; in cases where multiple race information was collected and decedents were  
18 identified as two or more races (0.29%), NVSS included an imputed or "bridged" race value that  
19 corresponds to the predicted "primary" race for each decedent.<sup>1</sup> We used the imputed and bridged  
20 values for the present analysis. NVSS does not impute missing Latino ethnicity (0.29%); for the purposes  
21 of this analysis, deaths among individuals with unknown Latino ethnicity were redistributed in proportion  
22 to the size of the Latino and non-Latino populations in the same county, race, age, sex, and time period.  
23 To ensure stable ratios for this redistribution, we pooled data over time as needed to achieve a minimum  
24 population of 50. This threshold of 50 is somewhat arbitrary, but was selected in an attempt to balance  
25 the need for stable ratios with the desire to have ratios that reflect the distribution of the population  
26 within as specific a time-range as possible.

27

### 28 2.2 Covariate imputation and smoothing

29 The small area estimation models used in the present study to estimate mortality rates leverage observed  
30 relationships between the level of mortality and sociodemographic and socioeconomic factors  
31 (covariates) to improve estimates where populations are small and the observed number of deaths is an  
32 imprecise indicator of the underlying mortality rate. Among the five covariates used in this analysis,  
33 educational attainment (bachelor's degree or higher), poverty rate, and proportion foreign-born were  
34 stratified by both county and race/ethnicity, while median household income and population density  
35 were stratified only by county and represent estimates for the total population in that county (section



36 3.2). The race/ethnicity-stratified covariates contained missing values and displayed instability and low  
37 precision for some strata with small populations. As covariate estimates are required for all space-time-  
38 race/ethnicity combinations in order to derive mortality predictions, small area imputation models were  
39 developed for race/ethnicity-specific covariates to derive smoothed covariate estimates in all years,  
40 counties, and racial/ethnic groups prior to including these covariates in the mortality models. Covariates  
41 that were not stratified by race/ethnicity in addition to county were incorporated in the mortality models  
42 in their original (non-imputed) forms due to their larger effective sample sizes and complete spatial and  
43 temporal coverage.

44  
45 The race/ethnicity-stratified covariates were modelled as binomial variables without stratification by age  
46 or sex. Covariate data were derived primarily from the American Community Survey (ACS) and decennial  
47 population census. Racial classifications in the tabulated ACS and census data include separate groups for  
48 Asians and for Native Hawaiians and Other Pacific Islanders (NHOPI); covariate data for these groups were  
49 combined into an Asian or Pacific Islander (API) group for consistency with the mortality models.  
50 Covariate data were also combined for merged counties to derive a stable location set matching that  
51 used in the mortality models (section 3.1). ACS provides estimates of uncertainty as Margins of Error  
52 (MOE) at a confidence level of 90%, rather than providing variance estimates. Per guidance from the  
53 Census Bureau,<sup>2</sup> variance was calculated for each subgroup as:

54  
55 
$$\text{Var}(X_i) = \left( \frac{\text{MOE}(X_i)}{1.645} \right)^2$$

56  
57 where  $X_i$  is the mean estimate for subgroup  $i$ . Again per Census guidance, variances for merged  
58 geographic and demographic entities were then calculated as the sum of the variances over component  
59 subgroups, assuming independence:

60  
61 
$$\text{Var}(X_1 + X_2) = \text{Var}(X_1) + \text{Var}(X_2)$$

62  
63 where  $X_1$  and  $X_2$  are mean estimates for two subgroups that are to be merged.

64  
65 As the ACS and decennial census data were derived from population samples but are reported as values  
66 scaled to total population sizes, their effective sample sizes were estimated in order to appropriately

67 scale sampling variance in the imputation models, using a three-pronged strategy. The long-form  
68 decennial census questionnaires in 1990 and 2000, from which the education, poverty, and foreign-born  
69 data were derived for those years, were collected from a 20% and 17% population sample, respectively.<sup>3</sup>  
70 Effective sample sizes were therefore assumed to be 20% or 17% of the total population for each county-  
71 year-race/ethnicity stratum in 1990 and 2000, respectively.

72

73 Effective sample sizes for ACS data, for which variances were calculated as above, were estimated using  
74 the relationship between effective sample size,  $\hat{n}_{eff}$ , estimates of the population proportion,  $\hat{p}$ , and its  
75 variance,  $\text{Var}(\hat{p})$ :<sup>4</sup>

76

$$77 \quad \hat{n}_{eff} = \frac{\hat{p}(1 - \hat{p})}{\text{Var}(\hat{p})}$$

78

79 As observations with observed proportions of 0.0 or 1.0 yield effective sample sizes of 0.0, the reported  
80 population fractions ( $\hat{p}$ ) for these county-year-race/ethnicity strata were transformed via an empirical  
81 logit transformation<sup>5</sup> and then inverse-transformed using the standard inverse logit function before  
82 calculating the corresponding effective sample sizes:

83

$$84 \quad \hat{p}_{emp} = \text{logit}^{-1} \left( \log \left( \frac{\hat{p} + \frac{\varepsilon}{2}}{1 - \hat{p} + \frac{\varepsilon}{2}} \right) \right)$$

85

86 where  $\text{logit}^{-1}$  is the standard inverse logit function and  $\varepsilon$  is defined as the smallest non-zero proportion  
87 in the data set. Effective sample sizes were calculated using these transformed proportions and the  
88 original reported  $\text{Var}(\hat{p})$ . Counts of individuals with the modelled outcome (attainment of a bachelor's  
89 degree or higher, living below the poverty line, or foreign-born) were then calculated for each row by  
90 multiplying their original reported proportions and estimated effective sample sizes.

91

92 Bayesian imputation models were fit in R-INLA<sup>6</sup> v.20.09.25 in R v3.5.1<sup>7</sup> using binomial likelihood models,  
93 and explicitly borrow strength over space, time, and race/ethnicity in an approach analogous to the small  
94 area mortality models:

95

96 
$$Y_{j,t,r} \sim \text{Binomial}(p_{j,t,r}, \hat{n}_{eff,j,t,r})$$

97 
$$\text{logit}(p_{j,t,r}) = \beta_0 + \gamma_{1,j} + \gamma_{2,j,t,r} + \gamma_{3,j,t} + \gamma_{4,r}$$

98

99 where  $Y_{j,t,r}$  is the estimated count of individuals in county  $j$ , year  $t$ , and race/ethnicity group  $r$  with the  
 100 modelled outcome, among an effective sample size of  $\hat{n}_{eff,j,t,r}$  with proportion  $p_{i,t,r}$ . Model terms  
 101 consist of:

- 102 •  $\beta_0$ , a global intercept with a Normal(0, 10) prior;
- 103 •  $\gamma_{1,j}$ , a county-level random effect with a Besag-York-Mollie-type prior (BYM2) combining a  
 104 conditional autoregressive distribution for spatial autocorrelation, based on county adjacency,  
 105 with independent-and-identically-distributed (IID) Gaussian distribution;
- 106 •  $\gamma_{2,j,t,r}$ , a county-, race/ethnicity-, and year-level random effect with a first-order autoregressive  
 107 (AR1) temporal prior, grouped by county and race/ethnicity;
- 108 •  $\gamma_{3,j,t}$ , a county- and year-level random effect with an AR1 temporal prior grouped by county;
- 109 • and  $\gamma_{4,r}$ , a race/ethnicity-level random effect with an IID Gaussian prior.

110

111 Default INLA hyper-priors were used. The BYM2 parameterization includes a parameter,  $\phi$ , which  
 112 indicates the contribution of the structured spatial effect to the marginal variance;  $\text{logit}(\phi)$  had a  
 113 penalized complexity (PC) prior<sup>8</sup> corresponding to  $\Pr(\phi < 0.5) = 0.5$ , and the log precision of the  
 114 BYM2 model had a PC prior corresponding to  $\Pr(\sigma > 1.0) = 0.1$ . The AR1 models had Gamma(shape =  
 115 1.0, inverse-scale =  $5 \cdot 10^{-5}$ ) priors on the precision and Normal(mean = 0.0, precision = 0.15) priors on the  
 116 logit of the 1-year lagged correlation ( $\rho$ ). The race/ethnicity IID term had a Gamma(shape = 1.0, inverse-  
 117 scale =  $5 \cdot 10^{-5}$ ) prior on the precision. These default priors were used as we considered them suitably  
 118 vague, in the absence of *a priori* information with which to establish more informative priors. The INLA  
 119 model employed a Gaussian approximation strategy, an empirical Bayes integration strategy, and a step-  
 120 length for hyper-parameter gradient calculations of  $1 \cdot 10^{-3}$ . Due to numerical instability in the model for  
 121 foreign-born proportion, a series of model fits were performed with iteratively decreasing values added  
 122 to the diagonal of the joint precision matrix (100, 10, and 1, respectively) to derive starting parameter  
 123 values for the final model run. Mean posterior predictions from the small area covariate models were  
 124 used as covariate estimates in the small area mortality models.

125

126 2.3 Small area model specification

127 County-race/ethnicity model

128 The following model was estimated separately for males and females:

129

130 
$$D_{j,t,a,r} \sim \text{Poisson}(m_{j,t,a,r} \cdot P_{j,t,a,r})$$

131 
$$\log(m_{j,t,a,r}) = \beta_0 + \boldsymbol{\beta}_1 \cdot \mathbf{X}_{1,j,t} + (\boldsymbol{\beta}_2 + \boldsymbol{\gamma}_{1,r}) \cdot \mathbf{X}_{2,j,t,r}$$

132 
$$+ \gamma_{2,j} + \gamma_{3,t,a,r} + \sum_{t'=1}^{k_t} \sum_{a'=1}^{k_a} (\gamma_{4,j,t',a',r} \cdot S_{t'}(t) \cdot S_{a'}(a))$$

133 Priors:

134  $\boldsymbol{\gamma}_1 \sim \text{IID}(\boldsymbol{\sigma}_1)$

135  $\boldsymbol{\gamma}_2 \sim \text{LCAR}(\rho_2, \sigma_2)$

136  $\boldsymbol{\gamma}_3 \sim \text{LCAR: LCAR: IID}(\rho_{3,t}, \rho_{3,a}, \sigma_3)$

137  $\boldsymbol{\gamma}_4 \sim \text{LCAR: LCAR: LCAR: MVN}(\rho_{4,a'}, \rho_{4,t'}, \rho_{4,j}, \boldsymbol{\sigma}_4, \theta)$

138

139 Hyper-priors:

140  $\sigma^{-2} \sim \text{PC}(\sigma_0 = 5, \alpha = 0.05) \rightarrow \Pr(\sigma > 5) = 0.05$

141  $\text{logit}(\rho) \sim \text{Normal}(0, 1.5)$

142

143 where

- 144 •  $j, t, a,$  and  $r$  are indices for the county, calendar year (2000–2019, renumbered sequentially from
- 145 0 to 19), age group (0, 1–4, 5–9, ..., 80–84, and 85+ years old, recoded sequentially from 0 to 18),
- 146 and race/ethnicity (White, Black, AIAN, API, and Latino, recoded in that order from 0 to 4),
- 147 respectively;
- 148 •  $D_{j,t,a,r}$  and  $P_{j,t,a,r}$  are the observed number of deaths and the population count, respectively, in
- 149 county  $j$ , year  $t$ , age group  $a$ , and race/ethnicity  $r$ ;
- 150 •  $m_{j,t,a,r}$  is the underlying mortality rate in county  $j$ , year  $t$ , age group  $a$ , and race/ethnicity  $r$ ;
- 151 •  $\mathbf{X}_{1,j,t}$  is a vector of covariates for county  $j$  and year  $t$ , and  $\boldsymbol{\beta}_1$  is the associated vector of
- 152 regression coefficients;
- 153 •  $\mathbf{X}_{2,j,t,r}$  is a vector of covariates for county  $j$ , year  $t$ , and race/ethnicity  $r$ , and  $\boldsymbol{\beta}_2 + \boldsymbol{\gamma}_{1,r}$  is the
- 154 associated vector of regression coefficients, made up of a fixed component ( $\boldsymbol{\beta}_2$ ) shared by all
- 155 racial/ethnic groups, and a random component ( $\boldsymbol{\gamma}_{1,r}$ ) that varies by race/ethnicity;

- 156 •  $\gamma_{2,j}$  is a county-level random intercept;
- 157 •  $\gamma_{3,a,t,r}$  is an age group-, year-, and race/ethnicity-level random intercept;
- 158 •  $\gamma_{4,j,t',a',r}$  is a county-, race/ethnicity-, year spline basis-, and age spline basis-level random
- 159 intercept;
- 160 •  $k_t$  is the number of time knots (four knots, evenly spaced from 2000–2019) and  $t'$  is the
- 161 corresponding index;
- 162 •  $k_a$  is the number of age knots (five knots, at age groups 0, 25–29, 45–49, 65–69, and 85+ years
- 163 old) and  $a'$  is the corresponding index;
- 164 •  $S_{t'}(t)$  is the value of spline basis  $t'$  for a linear spline on year, evaluated at year  $t$ ;
- 165 • and  $S_{a'}(a)$  is the value of spline basis  $a'$  for a linear spline on age, evaluated at age  $a$ .

166

167 Prior distributions were assigned for each random component:

- 168 • Each element of  $\boldsymbol{\gamma}_1$ —corresponding to each covariate in  $\mathbf{X}_1$ —was assumed to follow an
- 169 independent and identically distributed (IID) mean-0 Normal distribution.  $\boldsymbol{\gamma}_1$  is associated with
- 170 three hyper-parameters ( $\sigma_1^2$ ), corresponding to the variance of this random effect for each
- 171 covariate.
- 172 •  $\boldsymbol{\gamma}_2$  was assumed to follow a conditional autoregressive distribution of the form described by
- 173 Leroux, Lei, and Breslow (LCAR),<sup>9</sup> which corresponds to the following full conditional distribution
- 174 for each individual element of  $\boldsymbol{\gamma}_2$ :

175

$$176 \gamma_j | \gamma_{k \sim j}, \sigma^2, \rho \sim \text{Normal} \left( \frac{\rho \cdot \sum_{k \sim j} \gamma_k}{n_j \cdot \rho + 1 - \rho}, \frac{\sigma^2}{n_j \cdot \rho + 1 - \rho} \right)$$

177

178 where  $k \sim j$  indicates the set of counties that are adjacent to county  $j$  and  $n_j$  is the number of

179 counties in  $k \sim j$ . In this distribution, the  $\sigma^2$  parameter controls the amount of spatial variation,

180 while the  $\rho$  parameter, which varies between 0 and 1, determines the degree of spatial

181 smoothness.

- 182 •  $\boldsymbol{\gamma}_3$  was assumed to follow a mean-0, multivariate Normal distribution with a separable covariance
- 183 structure defined via the Kronecker product of the covariance matrix of three distributions:<sup>10,11</sup> a
- 184 conditional autoregressive distribution as in  $\boldsymbol{\gamma}_2$  but defined for age groups rather than counties; a
- 185 second conditional autoregressive distribution as in  $\boldsymbol{\gamma}_2$  but defined for time period rather than
- 186 counties; and a multivariate Normal distribution with a diagonal covariance matrix. This random

187 effect is associated with three hyper-parameters:  $\rho_{3,a}$  and  $\rho_{3,t}$ , which control the correlation  
188 across age groups and time, respectively; and  $\sigma_3^2$  which controls variation.

189 •  $\gamma_4$  was also assumed to follow a mean-0, multivariate Normal distribution, in this case with a  
190 separable covariance structure defined via the Kronecker product of the covariance matrix of four  
191 distributions: three conditional autoregressive distributions as described above, for county, age  
192 spline basis, and year spline basis; and a multivariate Normal distribution for race/ethnicity. For  
193 this random effect, there are three sets of hyper-parameters:  $\rho_{4,a'}$ ,  $\rho_{4,t'}$ , and  $\rho_{4,j}$ , which control  
194 the smoothness over the age spline, year spline, and county, respectively;  $\sigma_4^2$  (length = 5) which  
195 controls the variation for each race/ethnicity group; and  $\theta$  (length = 10), the elements of a lower-  
196 triangular matrix  $L$  which defines the correlation matrix over race/ethnicity:  $\Sigma = D^{-\frac{1}{2}}LL'D^{-\frac{1}{2}}$ ,  
197 where  $D = \text{diag}(LL')$ .

198

199 Finally, hyper-priors were defined for the standard deviation ( $\sigma$ ) and, where applicable, autocorrelation  
200 ( $\rho$ ) hyper-parameters:

201 • Penalized complexity (PC) priors<sup>8</sup> were specified for the inverse variance ( $1/\sigma^2$ ) of each random  
202 effect. PC priors shrink toward a base model, which in this case is where the marginal variance is  
203 0. They are specified by setting the tail probability on each hyper-parameter. We followed the  
204 recommendation by Fuglstad et al.,<sup>8</sup> selecting priors that satisfy  $Pr(\sigma > \sigma_0) = 0.05$  where  $\sigma_0$  is  
205 between 2.5 and 40 times the expected true marginal standard deviation. Specifically, we set  
206  $\sigma_0 = 5$ ;  $Pr(\sigma > \sigma_0) = 0.05$ .

207 • Normal(0, 1.5) priors were specified for the logit-transform of the correlation parameters ( $\rho$ ).

208 Posterior means and standard errors for these hyper-parameters are provided in section 3.5.

209

210 Descriptively, this model specifies the log of the underlying mortality rate ( $m_{j,t,a,r}$ ) as a function of  
211 covariates and additional variation by county, year, age, and race/ethnicity. The covariates we included in  
212 this model—educational attainment, poverty rate, proportion foreign-born, median household income,  
213 and population density—were selected based on data availability and previously observed relationships  
214 with mortality. The fixed effects ( $\beta_1, \beta_2$ ) on both the county- and county-race/ethnicity-specific  
215 covariates ( $X_{1,j,t}, X_{2,j,t,r}$ ) capture the relationships between each covariate and mortality. For the  
216 race/ethnicity-specific covariates, we additionally include random effects,  $\gamma_1$ , to allow for the relationship  
217 between these variables and mortality to vary by race/ethnicity. The covariates do not explain all

218 variation in mortality across time, age, geography, and race/ethnicity, so further random effects are  
219 included in the model to capture additional variation. The random effect  $\gamma_2$  allows for spatial (ie,  
220 between-county) variation in the level of mortality, shared across age, year, and race/ethnicity. The  
221 random effect  $\gamma_3$  allows for variation in mortality by age, time, and race/ethnicity group, shared across all  
222 counties. Finally, the random effect  $\gamma_4$  was included to allow for county-specific deviations in the  
223 mortality patterns by age, time, and race/ethnicity, compared to the general pattern captured by  $\gamma_3$ . This  
224 random effect incorporates a linear spline in the age and time dimensions to reduce computational  
225 complexity: the equivalent model for all age groups and years was found to be computationally infeasible.  
226 Although the splines in this random effect are linear, we are not assuming that the time or age trends for  
227  $\log(m_{j,t,a,r})$  are linear, as both the contributions from the covariates as well as  $\gamma_3$  allow for non-linear  
228 variation. The purpose of these splines is rather to allow for additional variation along these dimensions  
229 for each county-race/ethnicity combination. The number of age and year knots were chosen to maximize  
230 flexibility while maintaining a reasonable runtime—this is the largest number of knots that we were able  
231 to include in a model that could be fitted in under two weeks. The placement of the age knots was  
232 determined by including the oldest and youngest ages and then spacing the inner age knots to align with  
233 common inflection points in the age pattern (excluding age 1 since we already included age 0). In testing  
234 several alternatives, we found that including the first and last ages proved to be most important for  
235 properly fitting the data, whereas the placement of the inner age knots typically did not have a large  
236 effect on the estimates. The year knots were simply distributed evenly over the study period. In testing,  
237 reasonable alternative placements of the year knots typically did not have a large effect on the resulting  
238 estimates.

239  
240 In addition to the more formal model validation we describe below, we assessed model fit by inspecting  
241 plots comparing the estimated time and age trends in mortality to the observed data at the national,  
242 state, and (in selected counties) county level. Additionally, we used graphical posterior predictive checks<sup>12</sup>  
243 to assess if the observed data are over-dispersed and/or zero-inflated relative to our model; we found no  
244 evidence that this is the case. Finally, we examined plots of the binned residuals compared to each  
245 covariate in order to assess the assumption that the relationship between log mortality and each  
246 covariate is linear; we found no evidence of bias in our estimates as a result of non-linearity in these  
247 relationships.

248

249 We used the Template Model Builder (TMB) package<sup>13</sup> to fit these models using an empirical Bayes  
 250 approach. TMB calculates analytic approximations to the posterior distribution based on Laplace  
 251 approximations. We use TMB for fitting these models rather than INLA—another common alternative to  
 252 classic Markov chain Monte Carlo (MCMC) methods and the tool that we used for the covariate  
 253 imputation and smoothing models (section 2.2)—as TMB is substantially more flexible with respect to the  
 254 model specification.<sup>14</sup> Of particular importance for this analysis: random effects in INLA are restricted to  
 255 two-way interactions, whereas TMB allows us to incorporate higher-order interactions ( $\boldsymbol{\gamma}_3$  and  $\boldsymbol{\gamma}_4$ ) in our  
 256 modelling approach.

257

### 258 County-level model

259 A similar model was estimated for all racial/ethnic groups combined. This was included in order to  
 260 perform model calibration of the race/ethnicity-specific estimates in order to prevent the race/ethnicity  
 261 misclassification adjustment from altering the overall (all racial/ethnic groups combined) mortality rate in  
 262 any given county. This model is as follows, with all terms defined as described above:

263

$$\begin{aligned}
 264 \quad & D_{j,t,a} \sim \text{Poisson}(m_{j,t,a} \cdot P_{j,t,a}) \\
 265 \quad & \log(m_{j,t,a}) = \beta_0 + \boldsymbol{\beta}_1 \cdot \mathbf{X}_{1,j,t} \\
 266 \quad & + \gamma_{2,j} + \gamma_{3,t,a} + \sum_{t'=1}^{k_t} \sum_{a'=1}^{k_a} (\gamma_{4,j,t',a'} \cdot S_{t'}(t) \cdot S_{a'}(a))
 \end{aligned}$$

267

268 Priors:

$$269 \quad \boldsymbol{\gamma}_2 \sim \text{LCAR}(\rho_2, \sigma_2)$$

$$270 \quad \boldsymbol{\gamma}_3 \sim \text{LCAR:LCAR}(\rho_{3,t}, \rho_{3,a}, \sigma_3)$$

$$271 \quad \boldsymbol{\gamma}_4 \sim \text{LCAR:LCAR:LCAR}(\rho_{4,a'}, \rho_{4,t'}, \rho_{4,j}, \sigma_4)$$

272

273 Hyper-priors:

$$274 \quad \sigma^{-2} \sim PC(\sigma_0 = 5, \alpha = 0.05) \rightarrow \Pr(\sigma > 5) = 0.05$$

$$275 \quad \text{logit}(\rho) \sim \text{Normal}(0, 1.5)$$

276

### 277 Hyper-prior sensitivity analysis

278 We considered a range of alternative specifications for the priors on standard deviation ( $\sigma$ ) terms. This  
 279 included three families of distributions—penalized complexity, Gamma, and half-Normal—and a range of



280 parametrizations for each. For the penalized complexity priors, we tested all permutations of the  
281 following parameters:  $\sigma_0 = 1, 5$ ;  $\Pr(\sigma > \sigma_0) = 0.05, 0.02, 0.1, 0.4, 0.8$ . The Gamma priors were  
282 specified for the inverse variance ( $1/\sigma^2$ ) and were parameterized by shape and scale. Permutations of  
283 the following parameterizations were considered: shape = 0.25, 0.5, 1, 2; scale = 1, 100, 1000. The  
284 half-Normal priors were specified for the standard deviation ( $\sigma$ ) and were parameterized by the mean  
285 ( $\mu_d$ ) and standard deviation ( $\sigma_d$ ) of the corresponding Normal distribution. Permutations of the following  
286 parameterizations were tested:  $\mu_d = 0$ ;  $\sigma_d = 1, 2, 4$ . The figure in section 4.2 shows the difference in the  
287 estimates derived from models using these alternate prior specifications compared to our main model.  
288 These differences are generally very small across all parameterizations and prior specifications.

289

## 290 2.4 Small area model validation

### 291 Approach

292 The framework used to evaluate the performance of the models in this analysis is an extension of a  
293 previously proposed<sup>15</sup> and extensively used<sup>16,17</sup> framework designed specifically for county-level models in  
294 the USA. It was modified to allow for evaluation of performance with respect to generating estimates of  
295 life expectancy by county and race/ethnicity.

296

297 First, a “validation set” of county-race/ethnicity pairs was identified. The validation set is a collection of  
298 county-race/ethnicity pairs for which directly calculated mortality rates are a good representation of the  
299 underlying mortality rate, ie, where the population and corresponding number of deaths is sufficiently  
300 large to generate stable direct estimates. In order to increase the number of county-racial/ethnic groups  
301 that were retained in the validation set, deaths and population data were pooled across time using a  
302 moving window of three years for the purposes of defining the validation set. A series of criteria were  
303 used to remove county-racial/ethnic groups from the set of all county-racial/ethnic groups, with the  
304 remainder forming the validation set. First, any county-racial/ethnic groups with zero pooled deaths in  
305 any age, sex, or year (window) were removed. Second, among the remaining county-racial/ethnic groups,  
306 those where the median (across all years, sexes, and age groups) coefficient of variation was greater than  
307 20% for the age-specific mortality rates or greater than 5% for the age-standardized and crude mortality  
308 rates were removed. In order to calculate the coefficient of variation, 1000 draws of death counts were  
309 simulated for each age group, sex, and year, assuming a Poisson distribution with rate and size equal to  
310 the observed mortality rate and population size, respectively; age-specific, crude (all-ages), and age-  
311 standardized mortality rates were then calculated for each draw; and finally the coefficient of variation

312 was calculated as the standard deviation of the draws divided by their mean. The validation set has 138  
313 county-race/ethnicity pairs, composed of 96 counties and 4 racial/ethnic groups (section 3.6). The AIAN  
314 group was not represented in the validation set. Once the validation set was identified, life tables were  
315 generated from the pooled mortality rates using the methods described in section 2.6. These pooled  
316 mortality rates and the corresponding estimates of life expectancy at birth were used as a “gold  
317 standard” against which to compare model predictions.

318  
319 Next, “validation datasets” were constructed. A total of 40 validation sets were used: 5 iterations each of  
320 simulated datasets with reference population sizes of 10, 100, 1000, 3000, 5000, 10000, 25000, and  
321 100000. Additionally, a sixth iteration was prepared for each of these population sizes because, rarely,  
322 models for some iterations failed to converge; this sixth iteration was only used if a model failed to  
323 converge. The sizes 1000–100000 were chosen because they correspond roughly to the 1st, 5th, 10th,  
324 25th, 50th, and 80th percentiles for the total population (all racial/ethnic groups combined) across all  
325 counties and years. Sizes 10 and 100 were added because similar population sizes are common for  
326 specific racial/ethnic groups at the county level. To make these validation data sets, a population of the  
327 specified size was sampled for each county-race/ethnicity in the validation set, with the probability of  
328 sampling an individual of a given age and sex proportional to the observed population structure for that  
329 county-race/ethnicity. Then, for each age and sex within each county-race/ethnicity, deaths were  
330 simulated from a Poisson distribution with mean equal to the observed mortality rate times the sampled  
331 population for that age group and sex. The data for all county-race/ethnicity pairs that were not in the  
332 validation set were included without modification.

333  
334 Finally, small area models were fit and predictions generated as described above to each of the 40  
335 validation datasets. To evaluate the performance, the predictions based on each validation data set were  
336 compiled and compared against the gold standard mortality rates and life expectancies. First, errors were  
337 calculated as  $e_{j,t,a,r}^{gs} - e_{j,t,a,r}^{pred}$  where  $e_{j,t,a,r}^{gs}$  is the gold standard life expectancy at birth, and  $e_{j,t,a,r}^{pred}$  is the  
338 predicted life expectancy at birth. The mean error and the mean absolute error—measures of bias and  
339 precision, respectively—were calculated across all county-racial/ethnic groups in the validation set and all  
340 iterations at each population level. Coverage (ie, the percentage of county-race/ethnicity-years where the  
341 gold standard estimate was between the lower and upper uncertainty intervals for the modelled  
342 estimate) was also recorded.

343

344 This validation procedure was used to assess and compare model performance of three models:

345 1. The racial/ethnic-group-specific model described in the previous section:

346 
$$D_{j,t,a,r} \sim \text{Poisson}(m_{j,t,a,r} \cdot P_{j,t,a,r})$$

347 
$$\log(m_{j,t,a,r}) = \beta_0 + \beta_1 \cdot X_{1,j,t} + (\beta_2 + \gamma_{1,r}) \cdot X_{2,j,t,r}$$

348 
$$+ \gamma_{2,j} + \gamma_{3,t,a,r} + \sum_{t'=1}^{k_t} \sum_{a'=1}^{k_a} (\gamma_{4,j,t',a',r} \cdot S_{t'}(t) \cdot S_{a'}(a))$$

349

350 2. The same model as in 1, but without covariates:

351 
$$D_{j,t,a,r} \sim \text{Poisson}(m_{j,t,a,r} \cdot P_{j,t,a,r})$$

352 
$$\log(m_{j,t,a,r}) = \beta_0 + \gamma_{2,j} + \gamma_{3,t,a,r} + \sum_{t'=1}^{k_t} \sum_{a'=1}^{k_a} (\gamma_{4,j,t',a',r} \cdot S_{t'}(t) \cdot S_{a'}(a))$$

353

354 3. The model for all racial/ethnic groups combined described in the previous section:

355 
$$D_{j,t,a} \sim \text{Poisson}(m_{j,t,a} \cdot P_{j,t,a})$$

356 
$$\log(m_{j,t,a}) = \beta_0 + \beta_1 \cdot X_{1,j,t} + \gamma_{2,j} + \gamma_{3,t,a} + \sum_{t'=1}^{k_t} \sum_{a'=1}^{k_a} (\gamma_{4,j,t',a'} \cdot S_{t'}(t) \cdot S_{a'}(a))$$

357

358 The variant of the model without covariates (model 2) was included to assess whether including

359 covariates improved performance of the model. The variant of the model with all racial/ethnic groups

360 combined (model 3) was included to assess the performance of the model at the county level for all

361 racial/ethnic groups combined. A separate validation set, gold standard, and validation data sets were

362 prepared in order to assess performance of this final model variant. To make the all-racial/ethnic-group

363 validation set, the same conditions that defined the racial/ethnic-group-specific validation set were

364 applied to the same data aggregated to the all-racial/ethnic-group level. The gold standard and validation

365 data sets were prepared as described above at the all-racial/ethnic-group level.

366

367 **Results**

368 The mean error, mean absolute error, and coverage for each model are provided in sections 3.7 (table)

369 and 4.3 (figure). The mean error is a measure of bias, ie, it indicates if the estimates from the models

370 were systematically higher or lower than the gold standard values. As expected, mean error tended to

371 improve (was closer to 0) as the simulated population size increased for all models and all racial/ethnic

372 groups. In model 1, there was little evidence of bias for most racial/ethnic groups. Mean errors were  
373 minimal at larger population sizes and relatively small at smaller population sizes for most racial/ethnic  
374 groups. There was some evidence of bias for the API and Black groups for counties with population  
375 <1000; the largest mean errors were for the API group, where the model underestimated by 0.86 years at  
376 size 10, and for the Black group, where the model overestimated by 0.39 years at size 10. However, the  
377 API group only had four counties in the validation set, so it is difficult to draw general conclusions about  
378 bias for this racial/ethnic group. Model 1 performed better than model 2 in terms of mean error: the  
379 mean errors for model 2 were larger than those for model 1 for most racial/ethnic groups at most  
380 population sizes, indicating that there was more bias in model 2 than in model 1. Mean errors for model 3  
381 were larger in magnitude than those calculated across every racial/ethnic group at all sizes for model 1  
382 and model 2. Nonetheless, the mean errors for models 2 and 3 were still relatively small, especially at  
383 larger population sizes.

384

385 The mean absolute error is a measure of overall error, ie, how much the model estimates differ from true  
386 estimates irrespective of direction. As expected, mean absolute errors tended to improve as size  
387 increased for all models and all racial/ethnic groups. In model 1, mean absolute error was relatively small,  
388 even at the smallest population sizes, indicating model 1 performed well for all racial/ethnic groups.  
389 Compared to model 1, model 2 performed worse overall in most racial/ethnic groups. While model 2  
390 performed worse than model 1 in general, both models performed well at large population sizes; model 2  
391 had similar mean absolute errors at largest population sizes in every racial/ethnic group. The mean  
392 absolute errors for model 3 were smaller than the mean absolute errors calculated across every  
393 racial/ethnic group at every size in model 2, and at sizes 5000 and larger in model 1, indicating that model  
394 3 performed better at estimating all racial/ethnic groups together than models 1 and 2 did at estimating  
395 individual racial/ethnic groups overall.

396

397 Coverage is a measure of the calibration of the uncertainty intervals. Ideally, coverage should be close to  
398 95% because that means that the 95% uncertainty intervals were an appropriate reflection of an  
399 estimate's uncertainty. Coverage tended to be closer to 95% in model 1 than in model 2: model 1 had  
400 more coverage values within +/- 1 percentage point of 95% compared to model 2. Coverage in model 2  
401 varied more across racial/ethnic groups than in model 1; model 1 had more consistent values in a  
402 narrower range than model 2. Coverage tended to be highest at the smallest population sizes, and then  
403 decreased as population size increased for most models and racial/ethnic group. This is likely due to the

404 wider uncertainty intervals at smaller population sizes, making it more likely for the gold standard to be  
405 inside the uncertainty interval. In model 2, coverage for the Black racial/ethnic group increased as  
406 population size increased until size 100 000.

407

## 408 2.5 Derivation of misclassification ratios by county, age, sex, and race/ethnicity

### 409 Extraction

410 Overall misclassification ratios, as well as misclassification ratios by age and sex, census region, and co-  
411 ethnic density were extracted from Arias et al.<sup>18</sup> for five racial/ethnic groups: White, Black, AIAN, API, and  
412 Latino. Specifically, data were extracted from the following locations:

- 413 • Overall misclassification ratios: Table 2, “Total” column for both sexes.
- 414 • Age-sex misclassification ratios: Table 2, age-specific columns for each sex separately.
- 415 • Census region misclassification ratios: Table 3, results by “Region”
- 416 • Co-ethnic density misclassification ratios: Table 3, results by “Coethnic concentration”; AIAN  
417 ratios extracted from the results shown for all AIAN because these were not available specifically  
418 for non-Latino AIAN.

419

420 The co-ethnic density misclassification ratios were assigned to a county using the same method outlined  
421 in Arias et al.:<sup>18</sup> for the AIAN population, counties in Contract Health Service Delivery Areas (CHSDAs)  
422 were considered to have high co-ethnic density; for the Latino population, counties with high co-ethnic  
423 density were those within the first 50<sup>th</sup> percentile of ranked deaths by county between 1999 and 2011.  
424 This method assumes that the relative increase or decrease in misclassification for counties with low or  
425 high co-ethnic density compared to the total misclassification ratio for AIAN (including both Latino and  
426 non-Latino AIAN) is representative of that for non-Latino AIAN. We are not aware of any studies on this  
427 topic, but we make this assumption in order to include adjustment by co-ethnic density given the  
428 evidence that this form of misclassification is especially important with respect to the AIAN population.<sup>19–</sup>

429 <sup>21</sup>

430

### 431 Combination

432 1000 draws of each misclassification ratio were generated assuming these ratios are log-Normally  
433 distributed. We selected a log-Normal distribution as it is restricted to positive numbers, which is  
434 appropriate for this ratio; however, we acknowledge that this selection is somewhat arbitrary and is at

435 best an approximation of the true ratio distribution. The draws of misclassification were then combined  
436 (without ordering) using the following approach:

437

$$438 \quad \text{ratio}_{final} = \text{ratio}_{overall} \cdot \frac{\text{ratio}_{age,sex}}{\text{ratio}_{overall}} \cdot \frac{\text{ratio}_{region}}{\text{ratio}_{overall}} \cdot \frac{\text{ratio}_{co-ethnic density}}{\text{ratio}_{overall}}$$

439

440 For the White, Black, and API populations,  $\text{ratio}_{co-ethnic density}$  is equal to  $\text{ratio}_{overall}$ , so the last term  
441 is equal to 1 (ie, no adjustment by co-ethnic density). For the AIAN population, the  $\text{ratio}_{overall}$  in the  
442 denominator of the final term was the overall misclassification ratio for both Latino and non-Latino AIAN  
443 populations combined, to match the numerator, which was available only for Latino and non-Latino AIAN  
444 populations combined; in all other terms, the values for the non-Latino AIAN population alone were used.

445

446 This approach assumes that the degree of misclassification is independent across each dimension. Thus,  
447 the degree of misclassification reported for a particular facet (eg, by age/sex) is the same across all other  
448 facets (eg, region and co-ethnic density). For example, the age/sex pattern of misclassification for a given  
449 race/ethnicity group will be the same regardless of region.

450

#### 451 [Mortality rate adjustment](#)

452 The 1000 draws of misclassification ratios were merged onto the 1000 posterior draws of the mortality  
453 rate by age, sex, county (which reflected both region and co-ethnic density), and race/ethnicity. The  
454 merge by age was conducted by aligning the age groups in the model (0, 1–4, 5–9, ..., 80–84, and 85+  
455 years old) with the age bin to which each of the modelled ages belongs (ie, age groups 0, 1–4, 5–9, 10–  
456 14, 15–19, and 20–24 were merged onto the age bin 0–24). These draws were not ordered, thus  
457 assuming independence between the mortality rate and the misclassification ratio. Mortality rate draws  
458 were adjusted by multiplying by the corresponding misclassification ratio draw.

459

#### 460 [Impact of misclassification adjustment and calibration](#)

461 Both misclassification adjustment and model calibration play important roles in creating more accurate  
462 life expectancy estimates. First, misclassification adjustment accounts for under- or over-reporting of  
463 certain races/ethnicities on death certificates. However, because this adjustment is done independently  
464 for each racial/ethnic group, it can change the overall level of life expectancy estimated for a given  
465 county. Our calibration procedure thus serves two purposes: to constrain the adjusted estimates such

466 that the overall level of mortality implied by the race/ethnicity-specific estimates is the same as when  
467 estimating at the county level; and to ensure consistency in the estimates at the county, state, and  
468 national level within this analysis and between this analysis and the Global Burden of Disease Study.  
469 Because these two processes are linked, we show here the cumulative impact of both adjustment for  
470 misclassification and calibration.

471  
472 The figure in section 4.4 demonstrates the impact of these calculations on life expectancy at the national  
473 level. The estimate of total life expectancy is impacted only by calibration, which results in a slight shift  
474 downward. The estimates for each racial/ethnic group are impacted by both adjustment for  
475 misclassification and the calibration procedure. The combined effect is small for the White and Black  
476 populations, as expected given the small size of the misclassification adjustments for these two groups.  
477 There are moderate decreases in life expectancy for the API and Latino populations, as well as increases  
478 in the uncertainty of those estimates, reflecting the somewhat larger misclassification adjustments as well  
479 as increased uncertainty from these adjustments. These processes have the largest effect on life  
480 expectancy among the AIAN population: there are fairly large decreases in life expectancy once adjusted  
481 and calibrated in addition to a large increase in uncertainty.

482  
483 The maps in section 4.5 show the corresponding impact at the county level. Again, for the total life  
484 expectancy values, these changes are caused by calibration alone, and we can observe many of these  
485 same calibration effects in the maps for life expectancy among the White and Black populations  
486 especially. The more substantial changes in life expectancy noted at the national level for the Latino, API,  
487 and AIAN population are again noted here, with changes at the county level generally in the same  
488 direction (ie, decreases in life expectancy). Perhaps counterintuitively, there are instances where for a  
489 particular county and race/ethnicity, the change in life expectancy after misclassification adjustment and  
490 calibration is not in the same direction as at the national level. This is caused by the interaction between  
491 adjustment and calibration. For example, in Bethel Census Area, Alaska, misclassification adjustment  
492 alone caused a decrease in life expectancy, but calibration caused the life expectancy to increase because  
493 the GBD estimates for Alaska are higher than our model's unadjusted estimates for Alaska. Another  
494 example is Bennett County, South Dakota, where life expectancy for the AIAN population is higher once  
495 adjusted and calibrated. In this case, this is not due to the GBD results being higher for South Dakota.  
496 Instead, this is due to misclassification adjustment. This county—along with many of the other unmasked  
497 counties in South Dakota—is a Contract Health Service Delivery Area (CHSDA), and therefore has a lower

498 misclassification adjustment. This adjustment is 1.17, while the denominator is 1.4 (the total AIAN  
499 misclassification ratio for both Latino and non-Latino AIAN). Thus, the ratios of ratios is less than 1. This is  
500 combined with the region misclassification ratio, which is 1.12 and has a denominator of 1.33 (the total  
501 non-Latino AIAN misclassification ratio). Thus, the contribution from the region misclassification ratio is  
502 also less than 1. This means that the combined misclassification ratios are less than 1 for most ages and  
503 sexes in this county, thus leading to a higher life expectancy. In contrast, Brown County, South Dakota  
504 exhibits decreases in life expectancy due to raking and calibration. This is because Brown County is not a  
505 CHSDA, and thus its associated adjustment is larger than 1.

506

## 507 2.6 Life table calculations

508 Standard demographic methods<sup>22</sup> were used to construct abridged period life tables for each county,  
509 year, sex, and race/ethnicity from the age-specific mortality rates estimated by the small area model. A  
510 key component of this process involves estimating  ${}_n a_x$ , the average years lived within the age interval  $x$   
511 to  $x + n$  by individuals who died within that age interval. For age groups 0 and 1–4, we use the formulas  
512 described by Preston et al.<sup>22</sup> (Table 3.3, p 48) adapted from the Coale and Demeny “West” model life  
513 tables.<sup>23</sup> For age groups 5–9, ..., 80–84, we start with an initial value for  ${}_n a_x$  of 2.5, ie, assuming deaths  
514 occurred, on average, midway through the interval. Then, for age groups 10–14, ..., 75–79, we improve  
515 upon these initial values using the iterative graduation procedure proposed by Keyfitz<sup>24</sup> as described by  
516 Preston et al. (pp 44–45);<sup>22</sup> this procedure requires inputs from adjacent age intervals of the same length,  
517 so we are unable to use this same approach to adjust the  ${}_n a_x$  values for age groups 5–9 or 80–84 which  
518 instead remain set at 2.5. Another key component involves estimating  $e_{85}$  or life expectancy in the  
519 terminal age group. The “classic” approach is to calculate  $e_{85}$  as  $1/m_{85}$ , a formula that assumes the  
520 population is stationary—ie, is neither growing nor shrinking, and has a constant age structure. Previous  
521 research has shown that this approach can result in substantially biased estimates of life expectancy at  
522 age 85 and, by extension, biased estimates of life expectancy at birth; in most settings, this bias is  
523 positive, reflecting growing populations at older ages which are consequently younger on average than  
524 implied by the stationary model.<sup>25</sup> We instead use the method proposed by Horiuchi and Coale, which  
525 incorporates the population growth rate for the terminal age group to allow for non-stationarity:  $e_{85} =$   
526  $(1/m_{85}) \cdot \exp(-0.095 \cdot m_{85}^{-1.4} \cdot r)$ .<sup>25,26</sup> Population growth rates calculated at the county level are highly  
527 unstable, so we instead use national-level, race/ethnicity-specific growth rates for each county, averaged  
528 over the preceding ten-year period. For the purposes of calculating life expectancy for all racial/ethnic



529 groups combined at the county level, we calculate a population-weighted average of the national-level  
530 growth rates, using the observed county-level populations by racial/ethnic group.

531

532 These life table calculations are carried out for each of the 1000 posterior draws of the age-specific  
533 mortality rates for each location, year, sex, and race/ethnicity so that lower and upper uncertainty  
534 bounds can be estimated for life expectancy at birth using the 2.5<sup>th</sup> and 97.5<sup>th</sup> percentiles of these draws.

535 For internal consistency, we calculate point estimates of the mortality rate and  ${}_n a_x$  as the mean of these  
536 draws, and then recalculate the remainder of the life table using the same methods described above to  
537 generate final point estimates of life expectancy.

538

## 539 2.7 References

- 540
- 541 1 Kochanek KD, Murphy SL, Xu J, Arias E. Deaths: final data for 2017. *Natl Vital Stat Rep* 2019; **68**.  
542 [https://www.cdc.gov/nchs/data/nvsr/nvsr68/nvsr68\\_09-508.pdf](https://www.cdc.gov/nchs/data/nvsr/nvsr68/nvsr68_09-508.pdf) (accessed Dec 23, 2019).
- 543 2 US Census Bureau. Instructions for applying statistical testing to American Community Survey data.  
544 2019. [https://www2.census.gov/programs-](https://www2.census.gov/programs-surveys/acs/tech_docs/statistical_testing/2019_Instructions_for_Stat_Testing_ACS.pdf)  
545 [surveys/acs/tech\\_docs/statistical\\_testing/2019\\_Instructions\\_for\\_Stat\\_Testing\\_ACS.pdf](https://www2.census.gov/programs-surveys/acs/tech_docs/statistical_testing/2019_Instructions_for_Stat_Testing_ACS.pdf) (accessed Dec  
546 17, 2020).
- 547 3 US Census Bureau. Overview - History - U.S. Census Bureau.  
548 [https://www.census.gov/history/www/through\\_the\\_decades/overview/](https://www.census.gov/history/www/through_the_decades/overview/) (accessed Dec 17, 2020).
- 549 4 Franco C, Little RJA, Louis TA, Slud EV. Comparative study of confidence intervals for proportions in  
550 complex sample surveys. *J Surv Stat Methodol* 2019; **7**: 334–64.
- 551 5 Warton DI, Hui FKC. The arcsine is asinine: the analysis of proportions in ecology. *Ecology* 2011; **92**: 3–  
552 10.
- 553 6 Rue H, Martino S, Chopin N. Approximate Bayesian inference for latent Gaussian models by using  
554 integrated nested Laplace approximations. *J R Stat Soc Ser B Stat Methodol* 2009; **71**: 319–92.
- 555 7 R Core Team. R: A language and environment for statistical computing. Vienna, Austria: R Foundation  
556 for Statistical Computing, 2019 <https://www.R-project.org/>.
- 557 8 Fuglstad G-A, Simpson D, Lindgren F, Rue H. Constructing priors that penalize the complexity of  
558 Gaussian random fields. *J Am Stat Assoc* 2019; **114**: 445–52.
- 559 9 Leroux BG, Lei X, Breslow N. Estimation of disease rates in small areas: a new mixed model for spatial  
560 dependence. In: *Statistical Models in Epidemiology, the Environment, and Clinical Trials*. New York:  
561 Springer-Verlag, 2000: 179–91.
- 562 10 Clayton D. Generalized linear mixed models. In: Gilks W, Richardson S, Spiegelhalter D, eds. *Markov*  
563 *Chain Monte Carlo in Practice*, 1st edn. Great Britain: Chapman & Hall, 1996: 275–302.
- 564 11 Knorr-Held L. Bayesian modelling of inseparable space-time variation in disease risk. *Stat Med* 2000;  
565 **19**: 2555–67.
- 566 12 Gelman A, Carlin JB, Stern HS, Dunson DB, Vehtari A, Rubin DB. *Bayesian data analysis*, Third edition.  
567 Boca Raton: CRC Press, 2014.
- 568 13 Kristensen K, Nielsen A, Berg CW, Skaug H, Bell B. TMB: automatic differentiation and Laplace  
569 approximation. *J Stat Softw* 2016; **70**: 1–21.
- 570 14 Osgood-Zimmerman A, Wakefield J. A statistical introduction to Template Model Builder: a flexible tool  
571 for spatial modeling. *ArXiv2103.09929 Stat* 2021; published online March 17.  
572 <http://arxiv.org/abs/2103.09929> (accessed March 30, 2022).

- 573 15 Srebotnjak T, Mokdad AH, Murray CJ. A novel framework for validating and applying standardized  
574 small area measurement strategies. *Popul Health Metr* 2010; **8**: 26.
- 575 16 Dwyer-Lindgren L, Mokdad AH, Srebotnjak T, Flaxman AD, Hansen GM, Murray CJ. Cigarette smoking  
576 prevalence in US counties: 1996-2012. *Popul Health Metr* 2014; **12**: 5.
- 577 17 Dwyer-Lindgren L, Bertozzi-Villa A, Stubbs RW, *et al.* US county-level trends in mortality rates for major  
578 causes of death, 1980-2014. *JAMA* 2016; **316**: 2385–401.
- 579 18 Arias E, Heron M, Hakes J. The validity of race and Hispanic-origin reporting on death certificates in the  
580 United States: an update. *Vital Health Stat* 2016; **2**.  
581 [https://www.cdc.gov/nchs/data/series/sr\\_02/sr02\\_172.pdf](https://www.cdc.gov/nchs/data/series/sr_02/sr02_172.pdf).
- 582 19 Dankovchik J, Hoopes MJ, Warren-Mears V, Knaster E. Disparities in life expectancy of Pacific  
583 Northwest American Indians and Alaska Natives: analysis of linkage-corrected life tables. *Public Health*  
584 *Rep* 2015; **130**: 71–80.
- 585 20 Joshi S, Weiser T, Warren-Mears V. Drug, opioid-involved, and heroin-involved overdose deaths among  
586 American Indians and Alaska Natives — Washington, 1999–2015. *Morb Mortal Wkly Rep* 2018; **67**:  
587 1384–7.
- 588 21 Arias E, Schauman WS, Eschbach K, Sorlie PD, Backlund E. The validity of race and Hispanic origin  
589 reporting on death certificates in the United States. *Vital Health Stat* 2 2008; **2**.
- 590 22 Preston SH, Heuveline P, Guillot M. Demography: measuring and modeling population processes.  
591 Malden, MA: Blackwell Publishers, 2001.
- 592 23 Coale AJ, Demeny PG. Regional model life tables and stable populations, 2nd ed. New York: Academic  
593 Press, 1983.
- 594 24 Keyfitz N. A life table that agrees with the data. *J Am Stat Assoc* 1966; **61**: 305–12.
- 595 25 Ediev DM. Expectation of life at old age: revisiting Horiuchi-Coale and reconciling with Mitra. *Genus*  
596 2018; **74**: 3.
- 597 26 Horiuchi S, Coale AJ. A simple equation for estimating the expectation of life at old ages. *Popul Stud*  
598 1982; **36**: 317–26.
- 599

600  
601  
602

### 3 Supplemental Methods Tables

#### 3.1 Counties combined to create historically stable units of analysis

| State        | Group | Counties (FIPS)                                                                                                                                                                                                                       |
|--------------|-------|---------------------------------------------------------------------------------------------------------------------------------------------------------------------------------------------------------------------------------------|
| Alaska       | 1     | Chugach Census Area (2063), Copper River Census Area (2066), Valdez-Cordova Census Area (2261)*                                                                                                                                       |
|              | 2     | Kusilvak Census Area (2158), Wade Hampton Census Area (2270)*                                                                                                                                                                         |
|              | 3     | Kobuk Census Area (2140)*, Northwest Arctic Borough (2188)                                                                                                                                                                            |
|              | 4     | Aleutian Islands Census Area (2010)*, Aleutians East Borough (2013), Aleutians West Census Area (2016)                                                                                                                                |
|              | 5     | Dillingham Census Area (2070), Lake and Peninsula Borough (2164)                                                                                                                                                                      |
|              | 6     | Denali Borough (2068), Yukon-Koyukuk Census Area (2290)                                                                                                                                                                               |
|              | 7     | Hoonah-Angoon Census Area (2105), Skagway Municipality (2230), Skagway-Yakutat-Angoon Census Area (2231)*, Skagway-Hoonah-Angoon Census Area (2232)*, Yakutat City and Borough (2282)                                                 |
|              | 8     | Ketchikan Gateway Borough (2130), Petersburg Borough (2195), Prince of Wales-Hyder Census Area (2198), Prince of Wales-Outer Ketchikan Census Area (2201)*, Wrangell City and Borough (2275), Wrangell-Petersburg Census Area (2280)* |
| Arizona      | 1     | La Paz County (4012), Yuma County (4027)                                                                                                                                                                                              |
| Colorado     | 1     | Adams County (8001), Arapahoe County (8005), Boulder County (8013), Broomfield County (8014), Denver County (8031), Jefferson County (8059), Weld County (8123)                                                                       |
| Florida      | 1     | Dade County (12025)*, Miami-Dade County (12086)                                                                                                                                                                                       |
| Hawaii       | 1     | Kalawao County (15005), Maui County (15009)                                                                                                                                                                                           |
| Maryland     | 1     | Montgomery County (24031), Prince George's County (24033)                                                                                                                                                                             |
| Montana      | 1     | Park County (30067), Yellowstone National Park (30113)*                                                                                                                                                                               |
| New Mexico   | 1     | Cibola County (35006), Valencia County (35061)                                                                                                                                                                                        |
| South Dakota | 1     | Oglala Lakota County (46102), Shannon County (46113)*                                                                                                                                                                                 |
|              | 2     | Jackson County (46071), Washabaugh County (46131)*                                                                                                                                                                                    |
| Virginia     | 1     | Fairfax County (51059), Fairfax City (51600)                                                                                                                                                                                          |
|              | 2     | Rockingham County (51165), Harrisonburg City (51660)                                                                                                                                                                                  |
|              | 3     | James City County (51095), Williamsburg City (51830)                                                                                                                                                                                  |
|              | 4     | Prince William County (51153), Manassas City (51683), Manassas Park City (51685)                                                                                                                                                      |
|              | 5     | Rockbridge County (51163), Buena Vista City (51530)                                                                                                                                                                                   |
|              | 6     | Spotsylvania County (51177), Fredericksburg City (51630)                                                                                                                                                                              |
|              | 7     | Augusta County (51015), Staunton City (51790), Waynesboro City (51820)                                                                                                                                                                |
|              | 8     | Pittsylvania County (51143), Danville City (51590)                                                                                                                                                                                    |
|              | 9     | Greensville County (51081), Emporia City (51595)                                                                                                                                                                                      |
|              | 10    | Albemarle County (51003), Charlottesville City (51540)                                                                                                                                                                                |
|              | 11    | Bedford County (51019), Bedford City (51515)*                                                                                                                                                                                         |
|              | 12    | Halifax County (51083), South Boston City (51780)*                                                                                                                                                                                    |
|              | 13    | Southampton County (51175), Franklin City (51620)                                                                                                                                                                                     |
|              | 14    | Alleghany County (51005), Clifton Forge City (51560)*                                                                                                                                                                                 |
|              | 15    | York County (51199), Newport News City (51700)                                                                                                                                                                                        |

603  
604

\*County no longer exists due to boundary or name change.

605 3.2 Deaths and population data sources

606

---

| Data Type  | Data Source / Citations                                                                                                                                                                                                                                                                                                                                                                                                                                                                                                                                                                                                                                                                                                                                                                                                                                                                             |
|------------|-----------------------------------------------------------------------------------------------------------------------------------------------------------------------------------------------------------------------------------------------------------------------------------------------------------------------------------------------------------------------------------------------------------------------------------------------------------------------------------------------------------------------------------------------------------------------------------------------------------------------------------------------------------------------------------------------------------------------------------------------------------------------------------------------------------------------------------------------------------------------------------------------------|
| Deaths     | National Center for Health Statistics. National Vital Statistics System: Mortality Multiple Cause – All Counties Files, 2000–2019. Hyattsville, MD: National Center for Health Statistics, 2021. <a href="https://www.cdc.gov/nchs/nvss/nvss-restricted-data.htm">https://www.cdc.gov/nchs/nvss/nvss-restricted-data.htm</a>                                                                                                                                                                                                                                                                                                                                                                                                                                                                                                                                                                        |
| Population | National Center for Health Statistics, Centers for Disease Control and Prevention, US Census Bureau. United States Bridged-Race Intercensal Population Estimates 2000–2009. Hyattsville, United States: National Center for Health Statistics, Centers for Disease Control and Prevention, 2012. <a href="https://www.cdc.gov/nchs/nvss/bridged_race.htm">https://www.cdc.gov/nchs/nvss/bridged_race.htm</a> . Accessed October 30, 2012.<br><br>National Center for Health Statistics, Centers for Disease Control and Prevention, US Census Bureau. United States Vintage 2019 Bridged-Race Postcensal Population Estimates 2010–2019. Hyattsville, United States: National Center for Health Statistics, Centers for Disease Control and Prevention, 2020. <a href="https://www.cdc.gov/nchs/nvss/bridged_race.htm">https://www.cdc.gov/nchs/nvss/bridged_race.htm</a> . Accessed July 28, 2020. |

---

607

### 3.3 Covariate data sources

| Covariate               | Data Sources                                                                                                          | Data Processing                                                                                                                                                                                   | Citations                                                                                                                                                                                                                                                                                                                                                                                                                                                                                                                                                                                                                                                                                                                                                                                                                                                                                                                                                                                                                                                                                                                                                                                                                                                                                              |
|-------------------------|-----------------------------------------------------------------------------------------------------------------------|---------------------------------------------------------------------------------------------------------------------------------------------------------------------------------------------------|--------------------------------------------------------------------------------------------------------------------------------------------------------------------------------------------------------------------------------------------------------------------------------------------------------------------------------------------------------------------------------------------------------------------------------------------------------------------------------------------------------------------------------------------------------------------------------------------------------------------------------------------------------------------------------------------------------------------------------------------------------------------------------------------------------------------------------------------------------------------------------------------------------------------------------------------------------------------------------------------------------------------------------------------------------------------------------------------------------------------------------------------------------------------------------------------------------------------------------------------------------------------------------------------------------|
| Household median income | 2000–2019 Small Area Income and Poverty Estimates [1]; 2000–2019 Bureau of Labor Statistics, Consumer Price Index [2] | Data were adjusted for inflation using the consumer price index.                                                                                                                                  | [1] US Census Bureau. Small Area Income and Poverty Estimates. <a href="https://www.census.gov/programs-surveys/saipe/data/datasets.html">https://www.census.gov/programs-surveys/saipe/data/datasets.html</a> . Accessed April 9, 2021.<br>[2] US Bureau of Labor Statistics. Consumer Price Index: All Urban Consumers History, All Items 1913–2019. <a href="https://www.bls.gov/data/">https://www.bls.gov/data/</a> . Accessed July 28, 2020.                                                                                                                                                                                                                                                                                                                                                                                                                                                                                                                                                                                                                                                                                                                                                                                                                                                     |
| Population density      | 2000–2019 NCHS bridged race files [3–4]; 2013 cartographic boundary file, state-county for United States [5]          | The area of each county was calculated using an Albers Equal Area Conic projection. The total population of each county was divided by the total area of the county and was then log-transformed. | [3] National Center for Health Statistics, Centers for Disease Control and Prevention, US Census Bureau. United States Bridged-Race Intercensal Population Estimates 2000–2009. Hyattsville, United States: National Center for Health Statistics, Centers for Disease Control and Prevention, 2012. <a href="https://www.cdc.gov/nchs/nvss/bridged_race.htm">https://www.cdc.gov/nchs/nvss/bridged_race.htm</a> . Accessed October 30, 2012.<br>[4] National Center for Health Statistics, Centers for Disease Control and Prevention, US Census Bureau. United States Vintage 2019 Bridged-Race Postcensal Population Estimates 2010–2019. Hyattsville, United States: National Center for Health Statistics, Centers for Disease Control and Prevention, 2020. <a href="https://www.cdc.gov/nchs/nvss/bridged_race.htm">https://www.cdc.gov/nchs/nvss/bridged_race.htm</a> . Accessed July 28, 2020.<br>[5] US Census Bureau. TIGER/Line Shapefile, 2013 Cartographic Boundary File, State-County for United States, 1:20,000,000. <a href="https://catalog.data.gov/dataset/2013-cartographic-boundary-file-state-county-for-united-states-1-20000000">https://catalog.data.gov/dataset/2013-cartographic-boundary-file-state-county-for-united-states-1-20000000</a> . Accessed February 2, 2015. |

| Covariate                                                                                               | Data Sources                                          | Data Processing                                                                                                                                                                                                                                                                                                                                                   | Citations                                                                                                                                                                                                                                                                                                                                                                                                                                                                                                                                                                                                                                                                                                                                                                                                                     |
|---------------------------------------------------------------------------------------------------------|-------------------------------------------------------|-------------------------------------------------------------------------------------------------------------------------------------------------------------------------------------------------------------------------------------------------------------------------------------------------------------------------------------------------------------------|-------------------------------------------------------------------------------------------------------------------------------------------------------------------------------------------------------------------------------------------------------------------------------------------------------------------------------------------------------------------------------------------------------------------------------------------------------------------------------------------------------------------------------------------------------------------------------------------------------------------------------------------------------------------------------------------------------------------------------------------------------------------------------------------------------------------------------|
| Percent of the population age 25 and older who have completed a bachelor's degree by race and ethnicity | 1990 census [6]; 2000 census [7]; 2010–2019 ACS [8]   | ACS estimates for Black, American Indian or Alaskan Native (AIAN), and Asian or Pacific Islander (API) were not available stratified by Latino ethnicity and were used as proxies for non-Latino Black, non-Latino AIAN, and non-Latino API estimates, respectively. Imputation via a small area estimation model was used to generate and smooth missing values. | [6] Minnesota Population Center. 1990 Census Summary Tape File 4, Table NPB44. IPUMS National Historical Geographic Information System: Version 15.0. Minneapolis, MN: IPUMS 2020. <a href="https://www.nhgis.org/">https://www.nhgis.org/</a> . Accessed August 25, 2020.<br>[7] Minnesota Population Center. 2000 Census Summary File 4, Table NPCT064C. IPUMS National Historical Geographic Information System: Version 15.0. Minneapolis, MN: IPUMS 2020. <a href="https://www.nhgis.org/">https://www.nhgis.org/</a> . Accessed August 25, 2020.<br>[8] US Census Bureau. American Community Survey, 2010–2019 American Community Survey 5-Year Estimates, Tables C15002A–C15002I; using Census data portal; <a href="https://data.census.gov/cedsci/">https://data.census.gov/cedsci/</a> . Accessed April 9, 2021.    |
| Percent of the population below the poverty line by race and ethnicity                                  | 1990 census [9]; 2000 census [10]; 2010–2019 ACS [11] | ACS estimates for Black, American Indian or Alaskan Native (AIAN), and Asian or Pacific Islander (API) were not available stratified by Latino ethnicity and were used as proxies for non-Latino Black, non-Latino AIAN, and non-Latino API estimates, respectively. Imputation via a small area estimation model was used to generate and smooth missing values. | [9] Minnesota Population Center. 1990 Census Summary Tape File 4, Table NPB100. IPUMS National Historical Geographic Information System: Version 15.0. Minneapolis, MN: IPUMS 2020. <a href="https://www.nhgis.org/">https://www.nhgis.org/</a> . Accessed August 30, 2020.<br>[10] Minnesota Population Center. 2000 Census Summary File 4, Table NPCT142A. IPUMS National Historical Geographic Information System: Version 15.0. Minneapolis, MN: IPUMS 2020. <a href="https://www.nhgis.org/">https://www.nhgis.org/</a> . Accessed August 30, 2020.<br>[11] US Census Bureau. American Community Survey, 2010–2019 American Community Survey 5-Year Estimates, Tables B17001A–B17001I; using Census data portal; <a href="https://data.census.gov/cedsci/">https://data.census.gov/cedsci/</a> . Accessed April 9, 2021. |

| Covariate                                                            | Data Sources                                                 | Data Processing                                                                                                                                                                                                                                                                                                                                                   | Citations                                                                                                                                                                                                                                                                                                                                                                                                                                                                                                                                                                                                                                                                                                                                                                                                                                 |
|----------------------------------------------------------------------|--------------------------------------------------------------|-------------------------------------------------------------------------------------------------------------------------------------------------------------------------------------------------------------------------------------------------------------------------------------------------------------------------------------------------------------------|-------------------------------------------------------------------------------------------------------------------------------------------------------------------------------------------------------------------------------------------------------------------------------------------------------------------------------------------------------------------------------------------------------------------------------------------------------------------------------------------------------------------------------------------------------------------------------------------------------------------------------------------------------------------------------------------------------------------------------------------------------------------------------------------------------------------------------------------|
| Percent of the population that is foreign-born by race and ethnicity | 1990 census [12];<br>2000 census [13];<br>2010–2019 ACS [14] | ACS estimates for Black, American Indian or Alaskan Native (AIAN), and Asian or Pacific Islander (API) were not available stratified by Latino ethnicity and were used as proxies for non-Latino Black, non-Latino AIAN, and non-Latino API estimates, respectively. Imputation via a small area estimation model was used to generate and smooth missing values. | <p>[12] Minnesota Population Center. 1990 Census Summary Tape File 4, Table NPB28. IPUMS National Historical Geographic Information System: Version 15.0. Minneapolis, MN: IPUMS 2020. <a href="https://www.nhgis.org/">https://www.nhgis.org/</a>. Accessed October 8, 2020.</p> <p>[13] Minnesota Population Center. 2000 Census Summary File 4, Table NPCT043A. IPUMS National Historical Geographic Information System: Version 15.0. Minneapolis, MN: IPUMS 2020. <a href="https://www.nhgis.org/">https://www.nhgis.org/</a>. Accessed October 8, 2020.</p> <p>[14] US Census Bureau. American Community Survey, 2010–2019 American Community Survey 5-Year Estimates, Tables B05003A–B05003I; using Census data portal; <a href="https://data.census.gov/cedsci/">https://data.census.gov/cedsci/</a>. Accessed April 9, 2021.</p> |



### 3.4 Population and uncertainty mask

| Race/<br>Ethnicity | Population Mask    |                            |                             | Uncertainty Mask   |                            |                             | Combined Mask      |                            |                             |
|--------------------|--------------------|----------------------------|-----------------------------|--------------------|----------------------------|-----------------------------|--------------------|----------------------------|-----------------------------|
|                    | Counties<br>masked | County-<br>years<br>masked | Person-<br>years<br>masked* | Counties<br>masked | County-<br>years<br>masked | Person-<br>years<br>masked* | Counties<br>masked | County-<br>years<br>masked | Person-<br>years<br>masked* |
| White              | 59<br>(1.9%)       | 1180<br>(1.9%)             | 0.8<br>(0.0%)               | 6<br>(0.2%)        | 47<br>(0.1%)               | 0.1<br>(0.0%)               | 62<br>(2.0%)       | 1205<br>(1.9%)             | 0.8<br>(0.0%)               |
| Black              | 1622<br>(52.2%)    | 32440<br>(52.2%)           | 7.5<br>(1.0%)               | 503<br>(16.2%)     | 4677<br>(7.5%)             | 0.5<br>(0.1%)               | 1634<br>(52.5%)    | 32501<br>(52.3%)           | 7.6<br>(1.0%)               |
| AIAN               | 2636<br>(84.8%)    | 52720<br>(84.8%)           | 9.1<br>(17.8%)              | 2644<br>(85.0%)    | 47323<br>(76.1%)           | 8.8<br>(17.2%)              | 2752<br>(88.5%)    | 54175<br>(87.1%)           | 11.9<br>(23.3%)             |
| API                | 2443<br>(78.6%)    | 48860<br>(78.6%)           | 8.5<br>(2.6%)               | 1<br>(0.0%)        | 4<br>(0.0%)                | 0.0<br>(0.0%)               | 2443<br>(78.6%)    | 48860<br>(78.6%)           | 8.5<br>(2.6%)               |
| Latino             | 1632<br>(52.5%)    | 32640<br>(52.5%)           | 11.4<br>(1.2%)              | 70<br>(2.3%)       | 367<br>(0.6%)              | 0.1<br>(0.0%)               | 1636<br>(52.6%)    | 32655<br>(52.5%)           | 11.4<br>(1.2%)              |
| Total              | 31<br>(1.0%)       | 620<br>(1.0%)              | 0.4<br>(0.0%)               | 0<br>(0.0%)        | 0<br>(0.0%)                | 0.0<br>(0.0%)               | 31<br>(1.0%)       | 620<br>(1.0%)              | 0.4<br>(0.0%)               |

\*Person-years masked are given in millions.

### Population and uncertainty mask, by census region

| Race/<br>Ethnicity | Census<br>Region | Population Mask    |                            |                             | Uncertainty Mask   |                            |                             | Combined Mask      |                            |                             | Percent<br>Person-<br>Years in<br>Region |
|--------------------|------------------|--------------------|----------------------------|-----------------------------|--------------------|----------------------------|-----------------------------|--------------------|----------------------------|-----------------------------|------------------------------------------|
|                    |                  | Counties<br>masked | County-<br>years<br>masked | Person-<br>years<br>masked* | Counties<br>masked | County-<br>years<br>masked | Person-<br>years<br>masked* | Counties<br>masked | County-<br>years<br>masked | Person-<br>years<br>masked* |                                          |
| Latino             | South            | 686<br>(48.8%)     | 13720<br>(48.8%)           | 5.4<br>(1.5%)               | 9<br>(0.6%)        | 47<br>(0.2%)               | 0.0<br>(0.0%)               | 687<br>(48.8%)     | 13721<br>(48.8%)           | 5.4<br>(1.5%)               | 35.9%                                    |
|                    | West             | 152<br>(35.3%)     | 3040<br>(35.3%)            | 0.9<br>(0.2%)               | 21<br>(4.9%)       | 160<br>(1.9%)              | 0.0<br>(0.0%)               | 155<br>(36.0%)     | 3054<br>(35.4%)            | 0.9<br>(0.2%)               | 40.7%                                    |
|                    | Northeast        | 67<br>(30.9%)      | 1340<br>(30.9%)            | 0.7<br>(0.5%)               | 4<br>(1.8%)        | 15<br>(0.3%)               | 0.0<br>(0.0%)               | 67<br>(30.9%)      | 1340<br>(30.9%)            | 0.7<br>(0.5%)               | 14.1%                                    |
|                    | Midwest          | 727<br>(68.9%)     | 14540<br>(68.9%)           | 4.4<br>(4.9%)               | 36<br>(3.4%)       | 145<br>(0.7%)              | 0.0<br>(0.0%)               | 727<br>(68.9%)     | 14540<br>(68.9%)           | 4.4<br>(4.9%)               | 9.2%                                     |
| Black              | South            | 451<br>(32.1%)     | 9020<br>(32.1%)            | 2.8<br>(0.6%)               | 27<br>(1.9%)       | 167<br>(0.6%)              | 0.0<br>(0.0%)               | 451<br>(32.1%)     | 9020<br>(32.1%)            | 2.8<br>(0.6%)               | 56.1%                                    |
|                    | West             | 319<br>(74.0%)     | 6380<br>(74.0%)            | 1.2<br>(1.6%)               | 143<br>(33.2%)     | 1308<br>(15.2%)            | 0.1<br>(0.2%)               | 320<br>(74.2%)     | 6390<br>(74.1%)            | 1.2<br>(1.7%)               | 9.2%                                     |
|                    | Northeast        | 69<br>(31.8%)      | 1380<br>(31.8%)            | 0.6<br>(0.4%)               | 21<br>(9.7%)       | 208<br>(4.8%)              | 0.0<br>(0.0%)               | 70<br>(32.3%)      | 1383<br>(31.9%)            | 0.6<br>(0.4%)               | 16.4%                                    |
|                    | Midwest          | 783<br>(74.2%)     | 15660<br>(74.2%)           | 3.0<br>(2.1%)               | 314<br>(29.8%)     | 2976<br>(14.1%)            | 0.3<br>(0.2%)               | 792<br>(75.1%)     | 15707<br>(74.4%)           | 3.1<br>(2.1%)               | 18.4%                                    |
| White              | South            | 19<br>(1.4%)       | 380<br>(1.4%)              | 0.2<br>(0.0%)               | 0<br>(0.0%)        | 0<br>(0.0%)                | 0.0<br>(0.0%)               | 19<br>(1.4%)       | 380<br>(1.4%)              | 0.2<br>(0.0%)               | 34.8%                                    |
|                    | West             | 18<br>(4.2%)       | 360<br>(4.2%)              | 0.3<br>(0.0%)               | 5<br>(1.2%)        | 33<br>(0.4%)               | 0.1<br>(0.0%)               | 20<br>(4.6%)       | 379<br>(4.4%)              | 0.3<br>(0.0%)               | 19.5%                                    |
|                    | Northeast        | 0<br>(0.0%)        | 0<br>(0.0%)                | 0.0<br>(0.0%)               | 0<br>(0.0%)        | 0<br>(0.0%)                | 0.0<br>(0.0%)               | 0<br>(0.0%)        | 0<br>(0.0%)                | 0.0<br>(0.0%)               | 19.3%                                    |
|                    | Midwest          | 22<br>(2.1%)       | 440<br>(2.1%)              | 0.3<br>(0.0%)               | 0<br>(0.0%)        | 0<br>(0.0%)                | 0.0<br>(0.0%)               | 22<br>(2.1%)       | 440<br>(2.1%)              | 0.3<br>(0.0%)               | 26.4%                                    |
| AIAN               | South            | 1246               | 24920                      | 3.9                         | 1281               | 23046                      | 3.5                         | 1297               | 25341                      | 4.5                         | 32.0%                                    |

| Race/<br>Ethnicity | Census<br>Region | Population Mask    |                            |                             | Uncertainty Mask   |                            |                             | Combined Mask      |                            |                             | Percent<br>Person-<br>Years in<br>Region |
|--------------------|------------------|--------------------|----------------------------|-----------------------------|--------------------|----------------------------|-----------------------------|--------------------|----------------------------|-----------------------------|------------------------------------------|
|                    |                  | Counties<br>masked | County-<br>years<br>masked | Person-<br>years<br>masked* | Counties<br>masked | County-<br>years<br>masked | Person-<br>years<br>masked* | Counties<br>masked | County-<br>years<br>masked | Person-<br>years<br>masked* |                                          |
|                    |                  | (88.6%)            | (88.6%)                    | (23.5%)                     | (91.0%)            | (81.9%)                    | (21.2%)                     | (92.2%)            | (90.1%)                    | (27.2%)                     |                                          |
|                    | West             | 269<br>(62.4%)     | 5380<br>(62.4%)            | 1.3<br>(5.6%)               | 231<br>(53.6%)     | 3943<br>(45.7%)            | 0.5<br>(2.2%)               | 272<br>(63.1%)     | 5386<br>(62.5%)            | 1.3<br>(5.6%)               | 44.3%                                    |
|                    | Northeast        | 172<br>(79.3%)     | 3440<br>(79.3%)            | 0.9<br>(30.6%)              | 217<br>(100.0%)    | 4284<br>(98.7%)            | 2.9<br>(93.9%)              | 217<br>(100.0%)    | 4297<br>(99.0%)            | 2.9<br>(94.2%)              | 6.0%                                     |
|                    | Midwest          | 949<br>(90.0%)     | 18980<br>(90.0%)           | 3.0<br>(33.5%)              | 915<br>(86.7%)     | 16050<br>(76.1%)           | 1.9<br>(21.5%)              | 966<br>(91.6%)     | 19151<br>(90.8%)           | 3.3<br>(36.4%)              | 17.7%                                    |
| API                | South            | 1137<br>(80.8%)    | 22740<br>(80.8%)           | 4.0<br>(5.7%)               | 0<br>(0.0%)        | 0<br>(0.0%)                | 0.0<br>(0.0%)               | 1137<br>(80.8%)    | 22740<br>(80.8%)           | 4.0<br>(5.7%)               | 21.6%                                    |
|                    | West             | 309<br>(71.7%)     | 6180<br>(71.7%)            | 1.2<br>(0.8%)               | 1<br>(0.2%)        | 5<br>(0.1%)                | 0.0<br>(0.0%)               | 309<br>(71.7%)     | 6180<br>(71.7%)            | 1.2<br>(0.8%)               | 46.5%                                    |
|                    | Northeast        | 110<br>(50.7%)     | 2200<br>(50.7%)            | 0.8<br>(1.3%)               | 0<br>(0.0%)        | 0<br>(0.0%)                | 0.0<br>(0.0%)               | 110<br>(50.7%)     | 2200<br>(50.7%)            | 0.8<br>(1.3%)               | 20.0%                                    |
|                    | Midwest          | 887<br>(84.1%)     | 17740<br>(84.1%)           | 2.5<br>(6.5%)               | 0<br>(0.0%)        | 0<br>(0.0%)                | 0.0<br>(0.0%)               | 887<br>(84.1%)     | 17740<br>(84.1%)           | 2.5<br>(6.5%)               | 11.9%                                    |
| Total              | South            | 8<br>(0.6%)        | 160<br>(0.6%)              | 0.1<br>(0.0%)               | 0<br>(0.0%)        | 0<br>(0.0%)                | 0.0<br>(0.0%)               | 8<br>(0.6%)        | 160<br>(0.6%)              | 0.1<br>(0.0%)               | 37.0%                                    |
|                    | West             | 9<br>(2.1%)        | 180<br>(2.1%)              | 0.1<br>(0.0%)               | 0<br>(0.0%)        | 0<br>(0.0%)                | 0.0<br>(0.0%)               | 9<br>(2.1%)        | 180<br>(2.1%)              | 0.1<br>(0.0%)               | 23.2%                                    |
|                    | Northeast        | 0<br>(0.0%)        | 0<br>(0.0%)                | 0.0<br>(0.0%)               | 0<br>(0.0%)        | 0<br>(0.0%)                | 0.0<br>(0.0%)               | 0<br>(0.0%)        | 0<br>(0.0%)                | 0.0<br>(0.0%)               | 18.0%                                    |
|                    | Midwest          | 14<br>(1.3%)       | 280<br>(1.3%)              | 0.2<br>(0.0%)               | 0<br>(0.0%)        | 0<br>(0.0%)                | 0.0<br>(0.0%)               | 14<br>(1.3%)       | 280<br>(1.3%)              | 0.2<br>(0.0%)               | 21.8%                                    |

\*Person-years masked are given in millions.

### Population and uncertainty mask, by 2013 NCHS urban-rural classification

| Race/<br>Ethnicity | Urban/<br>Rural Code | Population Mask    |                            |                             | Uncertainty Mask   |                            |                             | Combined Mask      |                            |                             | Percent<br>Person-<br>Years in<br>Code |
|--------------------|----------------------|--------------------|----------------------------|-----------------------------|--------------------|----------------------------|-----------------------------|--------------------|----------------------------|-----------------------------|----------------------------------------|
|                    |                      | Counties<br>masked | County-<br>years<br>masked | Person-<br>years<br>masked* | Counties<br>masked | County-<br>years<br>masked | Person-<br>years<br>masked* | Counties<br>masked | County-<br>years<br>masked | Person-<br>years<br>masked* |                                        |
| Latino             | Large central metro  | 0<br>(0.0%)        | 0<br>(0.0%)                | 0.0<br>(0.0%)               | 0<br>(0.0%)        | 0<br>(0.0%)                | 0.0<br>(0.0%)               | 0<br>(0.0%)        | 0<br>(0.0%)                | 0.0<br>(0.0%)               | 49.5%                                  |
|                    | Large fringe metro   | 103<br>(26.0%)     | 1447<br>(22.8%)            | 0.7<br>(0.4%)               | 0<br>(0.0%)        | 0<br>(0.0%)                | 0.0<br>(0.0%)               | 103<br>(26.0%)     | 1447<br>(22.8%)            | 0.7<br>(0.4%)               | 17.2%                                  |
|                    | Medium metro         | 121<br>(24.8%)     | 1549<br>(22.7%)            | 0.7<br>(0.4%)               | 1<br>(0.2%)        | 3<br>(0.0%)                | 0.0<br>(0.0%)               | 121<br>(24.8%)     | 1549<br>(22.7%)            | 0.7<br>(0.4%)               | 19.8%                                  |
|                    | Small metro          | 149<br>(33.9%)     | 1841<br>(30.6%)            | 0.8<br>(1.4%)               | 1<br>(0.2%)        | 1<br>(0.0%)                | 0.0<br>(0.0%)               | 149<br>(33.9%)     | 1841<br>(30.6%)            | 0.8<br>(1.4%)               | 5.9%                                   |
|                    | Micropolitan         | 307<br>(37.5%)     | 4499<br>(36.9%)            | 2.3<br>(4.8%)               | 8<br>(1.0%)        | 21<br>(0.2%)               | 0.0<br>(0.0%)               | 309<br>(37.7%)     | 4501<br>(36.9%)            | 2.3<br>(4.8%)               | 4.9%                                   |
|                    | Noncore              | 1399<br>(76.6%)    | 23304<br>(78.9%)           | 6.8<br>(25.7%)              | 62<br>(3.4%)       | 342<br>(1.2%)              | 0.0<br>(0.2%)               | 1401<br>(76.7%)    | 23317<br>(79.0%)           | 6.9<br>(25.8%)              | 2.7%                                   |
| Black              | Large central metro  | 0<br>(0.0%)        | 0<br>(0.0%)                | 0.0<br>(0.0%)               | 0<br>(0.0%)        | 0<br>(0.0%)                | 0.0<br>(0.0%)               | 0<br>(0.0%)        | 0<br>(0.0%)                | 0.0<br>(0.0%)               | 42.1%                                  |
|                    | Large fringe metro   | 83<br>(21.0%)      | 1217<br>(19.2%)            | 0.5<br>(0.3%)               | 1<br>(0.3%)        | 1<br>(0.0%)                | 0.0<br>(0.0%)               | 83<br>(21.0%)      | 1217<br>(19.2%)            | 0.5<br>(0.3%)               | 20.8%                                  |
|                    | Medium metro         | 115<br>(23.6%)     | 1458<br>(21.3%)            | 0.5<br>(0.4%)               | 9<br>(1.8%)        | 33<br>(0.5%)               | 0.0<br>(0.0%)               | 115<br>(23.6%)     | 1458<br>(21.3%)            | 0.5<br>(0.4%)               | 19.0%                                  |
|                    | Small metro          | 125<br>(28.4%)     | 1531<br>(25.4%)            | 0.5<br>(0.9%)               | 26<br>(5.9%)       | 119<br>(2.0%)              | 0.0<br>(0.1%)               | 129<br>(29.3%)     | 1551<br>(25.8%)            | 0.5<br>(1.0%)               | 6.9%                                   |

| Race/<br>Ethnicity | Urban/<br>Rural Code   | Population Mask    |                            |                             | Uncertainty Mask   |                            |                             | Combined Mask      |                            |                             | Percent<br>Person-<br>Years in<br>Code |
|--------------------|------------------------|--------------------|----------------------------|-----------------------------|--------------------|----------------------------|-----------------------------|--------------------|----------------------------|-----------------------------|----------------------------------------|
|                    |                        | Counties<br>masked | County-<br>years<br>masked | Person-<br>years<br>masked* | Counties<br>masked | County-<br>years<br>masked | Person-<br>years<br>masked* | Counties<br>masked | County-<br>years<br>masked | Person-<br>years<br>masked* |                                        |
| White              | Micropolitan           | 384<br>(46.9%)     | 5723<br>(47.0%)            | 2.4<br>(4.9%)               | 98<br>(12.0%)      | 571<br>(4.7%)              | 0.2<br>(0.3%)               | 390<br>(47.6%)     | 5754<br>(47.2%)            | 2.4<br>(5.1%)               | 6.1%                                   |
|                    | Noncore                | 1340<br>(73.3%)    | 22511<br>(76.2%)           | 3.6<br>(9.1%)               | 428<br>(23.4%)     | 3935<br>(13.3%)            | 0.3<br>(0.8%)               | 1342<br>(73.5%)    | 22520<br>(76.3%)           | 3.6<br>(9.1%)               | 5.1%                                   |
|                    | Large central<br>metro | 0<br>(0.0%)        | 0<br>(0.0%)                | 0.0<br>(0.0%)               | 0<br>(0.0%)        | 0<br>(0.0%)                | 0.0<br>(0.0%)               | 0<br>(0.0%)        | 0<br>(0.0%)                | 0.0<br>(0.0%)               | 22.1%                                  |
|                    | Large fringe<br>metro  | 0<br>(0.0%)        | 0<br>(0.0%)                | 0.0<br>(0.0%)               | 0<br>(0.0%)        | 0<br>(0.0%)                | 0.0<br>(0.0%)               | 0<br>(0.0%)        | 0<br>(0.0%)                | 0.0<br>(0.0%)               | 24.8%                                  |
|                    | Medium<br>metro        | 1<br>(0.2%)        | 7<br>(0.1%)                | 0.0<br>(0.0%)               | 0<br>(0.0%)        | 0<br>(0.0%)                | 0.0<br>(0.0%)               | 1<br>(0.2%)        | 7<br>(0.1%)                | 0.0<br>(0.0%)               | 22.1%                                  |
|                    | Small metro            | 2<br>(0.5%)        | 14<br>(0.2%)               | 0.0<br>(0.0%)               | 0<br>(0.0%)        | 0<br>(0.0%)                | 0.0<br>(0.0%)               | 2<br>(0.5%)        | 14<br>(0.2%)               | 0.0<br>(0.0%)               | 10.4%                                  |
|                    | Micropolitan           | 9<br>(1.1%)        | 91<br>(0.7%)               | 0.1<br>(0.0%)               | 0<br>(0.0%)        | 0<br>(0.0%)                | 0.0<br>(0.0%)               | 9<br>(1.1%)        | 91<br>(0.7%)               | 0.1<br>(0.0%)               | 11.2%                                  |
|                    | Noncore                | 59<br>(3.2%)       | 1068<br>(3.6%)             | 0.7<br>(0.2%)               | 5<br>(0.3%)        | 33<br>(0.1%)               | 0.1<br>(0.0%)               | 61<br>(3.3%)       | 1087<br>(3.7%)             | 0.8<br>(0.2%)               | 9.4%                                   |
| AIAN               | Large central<br>metro | 8<br>(10.1%)       | 86<br>(6.6%)               | 0.1<br>(0.7%)               | 39<br>(49.4%)      | 455<br>(35.1%)             | 1.2<br>(14.2%)              | 39<br>(49.4%)      | 469<br>(36.2%)             | 1.2<br>(14.4%)              | 16.5%                                  |
|                    | Large fringe<br>metro  | 309<br>(78.0%)     | 4887<br>(77.2%)            | 1.5<br>(28.7%)              | 320<br>(80.8%)     | 4284<br>(67.6%)            | 1.6<br>(31.0%)              | 347<br>(87.6%)     | 5338<br>(84.3%)            | 2.2<br>(41.4%)              | 10.4%                                  |
|                    | Medium<br>metro        | 359<br>(73.6%)     | 4875<br>(71.3%)            | 1.5<br>(14.9%)              | 375<br>(76.8%)     | 4464<br>(65.3%)            | 1.7<br>(16.7%)              | 402<br>(82.4%)     | 5277<br>(77.2%)            | 2.1<br>(21.1%)              | 19.5%                                  |
|                    | Small metro            | 356<br>(80.9%)     | 4800<br>(79.7%)            | 1.3<br>(22.0%)              | 347<br>(78.9%)     | 3966<br>(65.8%)            | 1.0<br>(16.6%)              | 370<br>(84.1%)     | 4913<br>(81.6%)            | 1.5<br>(24.6%)              | 11.6%                                  |
|                    | Micropolitan           | 717<br>(87.5%)     | 10721<br>(88.0%)           | 2.1<br>(21.4%)              | 687<br>(83.9%)     | 9090<br>(74.6%)            | 1.6<br>(15.8%)              | 722<br>(88.2%)     | 10783<br>(88.5%)           | 2.3<br>(22.7%)              | 19.5%                                  |
|                    | Noncore                | 1694<br>(92.7%)    | 27351<br>(92.6%)           | 2.6<br>(22.5%)              | 1639<br>(89.7%)    | 25064<br>(84.9%)           | 1.7<br>(14.9%)              | 1700<br>(93.0%)    | 27395<br>(92.8%)           | 2.7<br>(23.2%)              | 22.4%                                  |
|                    | Large central<br>metro | 0<br>(0.0%)        | 0<br>(0.0%)                | 0.0<br>(0.0%)               | 0<br>(0.0%)        | 0<br>(0.0%)                | 0.0<br>(0.0%)               | 0<br>(0.0%)        | 0<br>(0.0%)                | 0.0<br>(0.0%)               | 51.8%                                  |
| API                | Large fringe<br>metro  | 184<br>(46.5%)     | 2673<br>(42.2%)            | 0.9<br>(1.1%)               | 0<br>(0.0%)        | 0<br>(0.0%)                | 0.0<br>(0.0%)               | 184<br>(46.5%)     | 2673<br>(42.2%)            | 0.9<br>(1.1%)               | 24.7%                                  |
|                    | Medium<br>metro        | 239<br>(49.0%)     | 3094<br>(45.3%)            | 0.9<br>(1.7%)               | 0<br>(0.0%)        | 0<br>(0.0%)                | 0.0<br>(0.0%)               | 239<br>(49.0%)     | 3094<br>(45.3%)            | 0.9<br>(1.7%)               | 15.9%                                  |
|                    | Small metro            | 241<br>(54.8%)     | 3100<br>(51.5%)            | 1.0<br>(8.1%)               | 0<br>(0.0%)        | 0<br>(0.0%)                | 0.0<br>(0.0%)               | 241<br>(54.8%)     | 3100<br>(51.5%)            | 1.0<br>(8.1%)               | 3.8%                                   |
|                    | Micropolitan           | 693<br>(84.6%)     | 10643<br>(87.4%)           | 3.5<br>(37.0%)              | 0<br>(0.0%)        | 0<br>(0.0%)                | 0.0<br>(0.0%)               | 693<br>(84.6%)     | 10643<br>(87.4%)           | 3.5<br>(37.0%)              | 2.9%                                   |
|                    | Noncore                | 1805<br>(98.8%)    | 29350<br>(99.4%)           | 2.2<br>(83.2%)              | 1<br>(0.1%)        | 5<br>(0.0%)                | 0.0<br>(0.0%)               | 1805<br>(98.8%)    | 29350<br>(99.4%)           | 2.2<br>(83.2%)              | 0.8%                                   |
|                    | Large central<br>metro | 0<br>(0.0%)        | 0<br>(0.0%)                | 0.0<br>(0.0%)               | 0<br>(0.0%)        | 0<br>(0.0%)                | 0.0<br>(0.0%)               | 0<br>(0.0%)        | 0<br>(0.0%)                | 0.0<br>(0.0%)               | 30.6%                                  |
|                    | Large fringe<br>metro  | 0<br>(0.0%)        | 0<br>(0.0%)                | 0.0<br>(0.0%)               | 0<br>(0.0%)        | 0<br>(0.0%)                | 0.0<br>(0.0%)               | 0<br>(0.0%)        | 0<br>(0.0%)                | 0.0<br>(0.0%)               | 23.0%                                  |
| Total              | Medium<br>metro        | 0<br>(0.0%)        | 0<br>(0.0%)                | 0.0<br>(0.0%)               | 0<br>(0.0%)        | 0<br>(0.0%)                | 0.0<br>(0.0%)               | 0<br>(0.0%)        | 0<br>(0.0%)                | 0.0<br>(0.0%)               | 21.0%                                  |
|                    | Small metro            | 1<br>(0.2%)        | 7<br>(0.1%)                | 0.0<br>(0.0%)               | 0<br>(0.0%)        | 0<br>(0.0%)                | 0.0<br>(0.0%)               | 1<br>(0.2%)        | 7<br>(0.1%)                | 0.0<br>(0.0%)               | 8.9%                                   |
|                    | Micropolitan           | 6<br>(0.7%)        | 70<br>(0.6%)               | 0.0<br>(0.0%)               | 0<br>(0.0%)        | 0<br>(0.0%)                | 0.0<br>(0.0%)               | 6<br>(0.7%)        | 70<br>(0.6%)               | 0.0<br>(0.0%)               | 9.2%                                   |
|                    | Noncore                | 31<br>(1.7%)       | 543<br>(1.8%)              | 0.4<br>(0.1%)               | 0<br>(0.0%)        | 0<br>(0.0%)                | 0.0<br>(0.0%)               | 31<br>(1.7%)       | 543<br>(1.8%)              | 0.4<br>(0.1%)               | 7.4%                                   |

\*Person-years masked are given in millions.

Modelled life expectancy estimates were masked (not displayed) under two conditions: first, estimates for any county-race/ethnicity with an average annual population of less than 1000 were masked in all years; second, estimates for any location-year-sex-race/ethnicity where the width of the uncertainty interval was greater than ten years were also masked. The number of unique counties masked, the number of county-years, and the person-years in millions represented by these county-years are listed in this table for the population mask (first criteria), uncertainty mask (second criteria), and the combined mask (both criteria combined).

### 3.5 Hyper-parameter posterior means and standard errors

| Model                             | Sex                                         | Effect                                      | Mean (SE) *                                           |                               |                    |
|-----------------------------------|---------------------------------------------|---------------------------------------------|-------------------------------------------------------|-------------------------------|--------------------|
| By race/ethnicity and county      | Females                                     | $\gamma_1$                                  | Standard deviation, Proportion with Bachelor's Degree | 0.026 (SE = 0.012)            |                    |
|                                   |                                             |                                             | Standard deviation, Proportion in poverty             | 0.028 (SE = 0.012)            |                    |
|                                   |                                             |                                             | Standard deviation, Proportion foreign born           | 0.133 (SE = 0.056)            |                    |
|                                   |                                             | $\gamma_2$                                  | Standard deviation                                    | 0.009 (SE = 0.007)            |                    |
|                                   |                                             |                                             | Correlation parameter, County                         | 0.555 (SE = 0.351)            |                    |
|                                   |                                             | $\gamma_3$                                  | Standard deviation                                    | 0.017 (SE = 0.001)            |                    |
|                                   |                                             |                                             | Correlation parameter, Year                           | >0.999 (SE < 0.001)           |                    |
|                                   |                                             |                                             | Correlation parameter, Age                            | 0.945 (SE = 0.010)            |                    |
|                                   |                                             | $\gamma_4$                                  | Standard deviation, Race/Ethnicity = White            | 0.147 (SE = 0.002)            |                    |
|                                   |                                             |                                             | Standard deviation, Race/Ethnicity = Black            | 0.156 (SE = 0.003)            |                    |
|                                   |                                             |                                             | Standard deviation, Race/Ethnicity = AIAN             | 0.423 (SE = 0.009)            |                    |
|                                   |                                             |                                             | Standard deviation, Race/Ethnicity = API              | 0.164 (SE = 0.005)            |                    |
|                                   | Standard deviation, Race/Ethnicity = Latino |                                             | 0.196 (SE = 0.004)                                    |                               |                    |
|                                   | Correlation parameter, County               |                                             | 0.983 (SE = 0.002)                                    |                               |                    |
|                                   | Correlation parameter, Year spline          |                                             | 0.935 (SE = 0.002)                                    |                               |                    |
|                                   | Correlation parameter, Age spline           | 0.481 (SE = 0.011)                          |                                                       |                               |                    |
|                                   | Males                                       | $\gamma_1$                                  | Standard deviation, Proportion with Bachelor's Degree | 0.065 (SE = 0.027)            |                    |
|                                   |                                             |                                             | Standard deviation, Proportion in poverty             | 0.026 (SE = 0.011)            |                    |
|                                   |                                             |                                             | Standard deviation, Proportion foreign born           | 0.171 (SE = 0.071)            |                    |
|                                   |                                             |                                             | $\gamma_2$                                            | Standard deviation            | 0.008 (SE = 0.006) |
| Correlation parameter, County     |                                             |                                             |                                                       | 0.562 (SE = 0.348)            |                    |
| $\gamma_3$                        |                                             |                                             | Standard deviation                                    | 0.02 (SE = 0.001)             |                    |
|                                   |                                             | Correlation parameter, Year                 | >0.999 (SE < 0.001)                                   |                               |                    |
|                                   |                                             | Correlation parameter, Age                  | 0.943 (SE = 0.009)                                    |                               |                    |
| $\gamma_4$                        |                                             | Standard deviation, Race/Ethnicity = White  | 0.13 (SE = 0.002)                                     |                               |                    |
|                                   |                                             | Standard deviation, Race/Ethnicity = Black  | 0.225 (SE = 0.003)                                    |                               |                    |
|                                   |                                             | Standard deviation, Race/Ethnicity = AIAN   | 0.367 (SE = 0.008)                                    |                               |                    |
|                                   |                                             | Standard deviation, Race/Ethnicity = API    | 0.163 (SE = 0.004)                                    |                               |                    |
|                                   |                                             | Standard deviation, Race/Ethnicity = Latino | 0.203 (SE = 0.004)                                    |                               |                    |
|                                   |                                             | Correlation parameter, County               | 0.977 (SE = 0.002)                                    |                               |                    |
|                                   |                                             | Correlation parameter, Year spline          | 0.959 (SE = 0.001)                                    |                               |                    |
| Correlation parameter, Age spline |                                             | 0.539 (SE = 0.01)                           |                                                       |                               |                    |
| By county                         |                                             | Females                                     | $\gamma_2$                                            | Standard deviation            | 0.06 (SE = 0.012)  |
|                                   |                                             |                                             |                                                       | Correlation parameter, County | 0.092 (SE = 0.101) |
|                                   | $\gamma_3$                                  |                                             | Standard deviation                                    | 0.016 (SE = 0.001)            |                    |
|                                   |                                             |                                             | Correlation parameter, Year                           | >0.999 (SE < 0.001)           |                    |
|                                   | Males                                       | $\gamma_3$                                  | Correlation parameter, Age                            | 0.930 (SE = 0.019)            |                    |
|                                   |                                             |                                             | Standard deviation                                    | 0.151 (SE = 0.002)            |                    |
|                                   |                                             | $\gamma_4$                                  | Correlation parameter, County                         | 0.973 (SE = 0.004)            |                    |
|                                   |                                             |                                             | Standard deviation                                    |                               |                    |

| Model | Sex   | Effect                             | Mean (SE) *         |
|-------|-------|------------------------------------|---------------------|
|       |       | Correlation parameter, Year spline | 0.939 (SE = 0.002)  |
|       |       | Correlation parameter, Age spline  | 0.334 (SE = 0.016)  |
|       | Males | $\gamma_2$ Standard deviation      | 0.077 (SE = 0.008)  |
|       |       | Correlation parameter, County      | 0.060 (SE = 0.043)  |
|       |       | $\gamma_3$ Standard deviation      | 0.017 (SE = 0.001)  |
|       |       | Correlation parameter, Year        | >0.999 (SE < 0.001) |
|       |       | Correlation parameter, Age         | 0.939 (SE = 0.016)  |
|       |       | $\gamma_4$ Standard deviation      | 0.145 (SE = 0.002)  |
|       |       | Correlation parameter, County      | 0.964 (SE = 0.005)  |
|       |       | Correlation parameter, Year spline | 0.954 (SE = 0.001)  |
|       |       | Correlation parameter, Age spline  | 0.273 (SE = 0.015)  |

\*Estimates are reported by TMB on the log standard deviation and logit correlation parameter scale. For convenience, we have transformed these using a delta transformation for the standard error.

### 3.6 County-racial/ethnic groups in the validation set

| <b>State</b>         | <b>Merged County</b>                                    | <b>Racial/Ethnic Group*</b>                         |
|----------------------|---------------------------------------------------------|-----------------------------------------------------|
| Alabama              | Jefferson                                               | All racial/ethnic groups, Black                     |
|                      | Madison                                                 | All racial/ethnic groups                            |
|                      | Mobile                                                  | All racial/ethnic groups, Black                     |
| Alaska               | Anchorage Municipality                                  | All racial/ethnic groups                            |
| Arizona              | Maricopa                                                | All racial/ethnic groups, Latino, Black, White      |
|                      | Pima                                                    | All racial/ethnic groups, Latino                    |
|                      | Pinal                                                   | All racial/ethnic groups                            |
| Arkansas             | Pulaski                                                 | All racial/ethnic groups                            |
| California           | Alameda                                                 | All racial/ethnic groups, Latino                    |
|                      | Contra Costa                                            | All racial/ethnic groups, White                     |
|                      | Fresno                                                  | All racial/ethnic groups, Latino                    |
|                      | Kern                                                    | All racial/ethnic groups, Latino, White             |
|                      | Los Angeles                                             | All racial/ethnic groups, Latino, API, Black, White |
|                      | Merced                                                  | All racial/ethnic groups                            |
|                      | Monterey                                                | All racial/ethnic groups, Latino                    |
|                      | Orange                                                  | All racial/ethnic groups, Latino, White             |
|                      | Riverside                                               | All racial/ethnic groups, Latino, White             |
|                      | Sacramento                                              | All racial/ethnic groups                            |
|                      | San Bernardino                                          | All racial/ethnic groups, Latino, Black             |
|                      | San Diego                                               | All racial/ethnic groups, Latino, White             |
|                      | San Francisco                                           | All racial/ethnic groups                            |
|                      | San Joaquin                                             | All racial/ethnic groups, Latino                    |
|                      | San Mateo                                               | All racial/ethnic groups                            |
|                      | Santa Clara                                             | All racial/ethnic groups, Latino, API               |
|                      | Solano                                                  | All racial/ethnic groups                            |
|                      | Sonoma                                                  | All racial/ethnic groups                            |
|                      | Stanislaus                                              | All racial/ethnic groups                            |
|                      | Tulare                                                  | All racial/ethnic groups, Latino                    |
| Ventura              | All racial/ethnic groups                                |                                                     |
| Colorado             | Adams/Arapahoe/Boulder/Broomfield/Denver/Jefferson/Weld | All racial/ethnic groups, Latino, White             |
|                      | El Paso                                                 | All racial/ethnic groups                            |
| Connecticut          | Fairfield                                               | All racial/ethnic groups, White                     |
|                      | Hartford                                                | All racial/ethnic groups                            |
|                      | New Haven                                               | All racial/ethnic groups, White                     |
| District of Columbia | District of Columbia                                    | All racial/ethnic groups, Black                     |
| Florida              | Brevard                                                 | All racial/ethnic groups                            |

| <b>State</b>  | <b>Merged County</b>       | <b>Racial/Ethnic Group*</b>                    |
|---------------|----------------------------|------------------------------------------------|
|               | Broward                    | All racial/ethnic groups, Black, White         |
|               | Miami-Dade                 | All racial/ethnic groups, Latino, Black        |
|               | Duval                      | All racial/ethnic groups, Black, White         |
|               | Hillsborough               | All racial/ethnic groups, Latino, Black, White |
|               | Lee                        | All racial/ethnic groups                       |
|               | Orange                     | All racial/ethnic groups                       |
|               | Palm Beach                 | All racial/ethnic groups, Latino, White        |
|               | Pasco                      | All racial/ethnic groups                       |
|               | Pinellas                   | All racial/ethnic groups                       |
|               | Polk                       | All racial/ethnic groups                       |
|               | Seminole                   | All racial/ethnic groups                       |
| Georgia       | Bibb                       | All racial/ethnic groups                       |
|               | Cobb                       | All racial/ethnic groups, White                |
|               | DeKalb                     | All racial/ethnic groups, Black                |
|               | Fulton                     | All racial/ethnic groups, Black, White         |
|               | Gwinnett                   | All racial/ethnic groups                       |
| Hawaii        | Honolulu                   | All racial/ethnic groups, API                  |
| Illinois      | Cook                       | All racial/ethnic groups, Latino, Black, White |
|               | DuPage                     | All racial/ethnic groups                       |
|               | Kane                       | All racial/ethnic groups                       |
|               | Lake                       | All racial/ethnic groups                       |
|               | Will                       | All racial/ethnic groups, White                |
| Indiana       | Allen                      | All racial/ethnic groups                       |
|               | Elkhart                    | All racial/ethnic groups                       |
|               | Lake                       | All racial/ethnic groups, Black                |
|               | Marion                     | All racial/ethnic groups, Black, White         |
| Iowa          | Polk                       | All racial/ethnic groups                       |
| Kansas        | Sedgwick                   | All racial/ethnic groups, White                |
| Kentucky      | Jefferson                  | All racial/ethnic groups, White                |
| Louisiana     | Caddo                      | All racial/ethnic groups                       |
|               | East Baton Rouge           | All racial/ethnic groups, Black                |
|               | Jefferson                  | All racial/ethnic groups                       |
|               | Orleans                    | All racial/ethnic groups, Black                |
| Maryland      | Anne Arundel               | All racial/ethnic groups                       |
|               | Baltimore                  | All racial/ethnic groups                       |
|               | Baltimore City             | All racial/ethnic groups, Black                |
|               | Montgomery/Prince George's | All racial/ethnic groups, Black                |
| Massachusetts | Bristol                    | All racial/ethnic groups                       |
|               | Essex                      | All racial/ethnic groups                       |



| <b>State</b> | <b>Merged County</b> | <b>Racial/Ethnic Group*</b>                    |
|--------------|----------------------|------------------------------------------------|
|              | Hampden              | All racial/ethnic groups                       |
|              | Middlesex            | All racial/ethnic groups, White                |
|              | Suffolk              | All racial/ethnic groups                       |
|              | Worcester            | All racial/ethnic groups                       |
| Michigan     | Genesee              | All racial/ethnic groups                       |
|              | Kent                 | All racial/ethnic groups                       |
|              | Macomb               | All racial/ethnic groups, White                |
|              | Oakland              | All racial/ethnic groups                       |
|              | Wayne                | All racial/ethnic groups, Black, White         |
| Minnesota    | Hennepin             | All racial/ethnic groups, White                |
|              | Ramsey               | All racial/ethnic groups                       |
| Mississippi  | Hinds                | All racial/ethnic groups, Black                |
| Missouri     | Jackson              | All racial/ethnic groups, White                |
|              | Saint Louis          | All racial/ethnic groups, Black, White         |
| Nebraska     | Douglas              | All racial/ethnic groups                       |
| Nevada       | Clark                | All racial/ethnic groups, Latino, White        |
|              | Washoe               | All racial/ethnic groups                       |
| New Jersey   | Bergen               | All racial/ethnic groups, White                |
|              | Burlington           | All racial/ethnic groups                       |
|              | Camden               | All racial/ethnic groups                       |
|              | Essex                | All racial/ethnic groups, Black                |
|              | Hudson               | All racial/ethnic groups                       |
|              | Mercer               | All racial/ethnic groups                       |
|              | Middlesex            | All racial/ethnic groups                       |
|              | Monmouth             | All racial/ethnic groups, White                |
|              | Ocean                | All racial/ethnic groups, White                |
|              | Passaic              | All racial/ethnic groups                       |
|              | Union                | All racial/ethnic groups                       |
| New Mexico   | Bernalillo           | All racial/ethnic groups, Latino               |
|              | Dona Ana             | All racial/ethnic groups                       |
|              | San Juan             | All racial/ethnic groups                       |
| New York     | Bronx                | All racial/ethnic groups, Latino, Black        |
|              | Erie                 | All racial/ethnic groups, White                |
|              | Kings                | All racial/ethnic groups, Latino, Black, White |
|              | Monroe               | All racial/ethnic groups, White                |
|              | Nassau               | All racial/ethnic groups, White                |
|              | New York             | All racial/ethnic groups, Latino               |
|              | Onondaga             | All racial/ethnic groups                       |
|              | Queens               | All racial/ethnic groups, Latino, API, Black   |

| <b>State</b>   | <b>Merged County</b> | <b>Racial/Ethnic Group*</b>                    |
|----------------|----------------------|------------------------------------------------|
| North Carolina | Suffolk              | All racial/ethnic groups, White                |
|                | Westchester          | All racial/ethnic groups, White                |
|                | Durham               | All racial/ethnic groups                       |
|                | Forsyth              | All racial/ethnic groups                       |
|                | Mecklenburg          | All racial/ethnic groups, White                |
| Ohio           | Wake                 | All racial/ethnic groups, White                |
|                | Cuyahoga             | All racial/ethnic groups, Black, White         |
|                | Franklin             | All racial/ethnic groups, Black                |
|                | Hamilton             | All racial/ethnic groups, Black, White         |
|                | Lucas                | All racial/ethnic groups                       |
| Oklahoma       | Montgomery           | All racial/ethnic groups, White                |
|                | Oklahoma             | All racial/ethnic groups, White                |
| Oregon         | Tulsa                | All racial/ethnic groups, White                |
|                | Multnomah            | All racial/ethnic groups                       |
| Pennsylvania   | Allegheny            | All racial/ethnic groups, Black, White         |
|                | Chester              | All racial/ethnic groups, White                |
|                | Delaware             | All racial/ethnic groups, White                |
|                | Lancaster            | All racial/ethnic groups, White                |
|                | Montgomery           | All racial/ethnic groups, White                |
|                | Philadelphia         | All racial/ethnic groups, Latino, Black, White |
| Rhode Island   | Providence           | All racial/ethnic groups, White                |
| South Carolina | Greenville           | All racial/ethnic groups, White                |
|                | Spartanburg          | All racial/ethnic groups                       |
| Tennessee      | Davidson             | All racial/ethnic groups, Black                |
|                | Knox                 | All racial/ethnic groups                       |
|                | Montgomery           | All racial/ethnic groups                       |
|                | Shelby               | All racial/ethnic groups, Black                |
| Texas          | Bell                 | All racial/ethnic groups                       |
|                | Bexar                | All racial/ethnic groups, Latino, White        |
|                | Cameron              | All racial/ethnic groups, Latino               |
|                | Collin               | All racial/ethnic groups, White                |
|                | Dallas               | All racial/ethnic groups, Latino, Black, White |
|                | Denton               | All racial/ethnic groups, White                |
|                | El Paso              | All racial/ethnic groups, Latino               |
|                | Fort Bend            | All racial/ethnic groups                       |
|                | Galveston            | All racial/ethnic groups                       |
|                | Harris               | All racial/ethnic groups, Latino, Black, White |
|                | Hidalgo              | All racial/ethnic groups, Latino               |
|                | Jefferson            | All racial/ethnic groups                       |

| <b>State</b> | <b>Merged County</b>   | <b>Racial/Ethnic Group*</b>             |
|--------------|------------------------|-----------------------------------------|
|              | McLennan               | All racial/ethnic groups                |
|              | Montgomery             | All racial/ethnic groups                |
|              | Tarrant                | All racial/ethnic groups, Latino, White |
|              | Travis                 | All racial/ethnic groups, White         |
|              | Webb                   | All racial/ethnic groups, Latino        |
| Utah         | Salt Lake              | All racial/ethnic groups, White         |
|              | Utah                   | All racial/ethnic groups, White         |
| Virginia     | Chesapeake City        | All racial/ethnic groups                |
|              | Fairfax/Fairfax City   | All racial/ethnic groups                |
|              | Norfolk City           | All racial/ethnic groups                |
|              | York/Newport News City | All racial/ethnic groups                |
| Washington   | Clark                  | All racial/ethnic groups                |
|              | King                   | All racial/ethnic groups, White         |
|              | Pierce                 | All racial/ethnic groups, White         |
|              | Spokane                | All racial/ethnic groups                |
|              | Yakima                 | All racial/ethnic groups                |
| Wisconsin    | Milwaukee              | All racial/ethnic groups, Black, White  |
|              | Rock                   | All racial/ethnic groups                |

\*All racial/ethnic groups was validated separately from individual racial/ethnic groups.

### 3.7 Validation results for life expectancy at birth for all models and racial/ethnic groups

| Racial/Ethnic Group               | Size    | Model 1    |                     |          | Model 2    |                     |          | Model 3    |                     |          |
|-----------------------------------|---------|------------|---------------------|----------|------------|---------------------|----------|------------|---------------------|----------|
|                                   |         | Mean Error | Mean Absolute Error | Coverage | Mean Error | Mean Absolute Error | Coverage | Mean Error | Mean Absolute Error | Coverage |
| Across all Racial/Ethnic Groups   | 10      | 0.06       | 0.91                | 96.57    | -0.02      | 1.41                | 92.50    |            |                     |          |
|                                   | 100     | 0.05       | 0.89                | 96.47    | -0.03      | 1.35                | 92.33    |            |                     |          |
|                                   | 1000    | 0.08       | 0.78                | 95.20    | 0.02       | 1.02                | 91.42    |            |                     |          |
|                                   | 3000    | -0.02      | 0.65                | 94.33    | -0.06      | 0.78                | 91.77    |            |                     |          |
|                                   | 5000    | 0.02       | 0.59                | 93.35    | -0.02      | 0.67                | 91.57    |            |                     |          |
|                                   | 10 000  | -0.01      | 0.48                | 93.22    | -0.04      | 0.53                | 92.16    |            |                     |          |
|                                   | 25 000  | -0.01      | 0.38                | 91.83    | -0.02      | 0.39                | 91.83    |            |                     |          |
|                                   | 100 000 | 0.00       | 0.27                | 86.73    | 0.00       | 0.27                | 87.14    |            |                     |          |
| All Racial/Ethnic Groups combined | 10      |            |                     |          |            |                     |          | 0.41       | 1.01                | 94.85    |
|                                   | 100     |            |                     |          |            |                     |          | 0.38       | 0.98                | 94.86    |
|                                   | 1000    |            |                     |          |            |                     |          | 0.26       | 0.85                | 92.91    |
|                                   | 3000    |            |                     |          |            |                     |          | 0.15       | 0.66                | 92.86    |
|                                   | 5000    |            |                     |          |            |                     |          | 0.13       | 0.58                | 91.98    |
|                                   | 10 000  |            |                     |          |            |                     |          | 0.04       | 0.48                | 91.40    |
|                                   | 25 000  |            |                     |          |            |                     |          | 0.03       | 0.36                | 90.68    |
|                                   | 100 000 |            |                     |          |            |                     |          | 0.01       | 0.24                | 86.43    |
| Latino                            | 10      | -0.24      | 1.08                | 98.89    | 0.06       | 1.11                | 97.46    |            |                     |          |
|                                   | 100     | -0.26      | 1.06                | 98.75    | 0.01       | 1.12                | 98.46    |            |                     |          |
|                                   | 1000    | -0.07      | 0.88                | 97.49    | 0.13       | 1.00                | 96.82    |            |                     |          |
|                                   | 3000    | -0.17      | 0.75                | 97.84    | -0.06      | 0.84                | 97.53    |            |                     |          |
|                                   | 5000    | -0.09      | 0.69                | 96.78    | 0.01       | 0.75                | 95.85    |            |                     |          |
|                                   | 10 000  | 0.00       | 0.57                | 96.30    | 0.05       | 0.59                | 96.25    |            |                     |          |
|                                   | 25 000  | -0.02      | 0.45                | 94.72    | 0.01       | 0.46                | 94.58    |            |                     |          |
|                                   | 100 000 | 0.01       | 0.34                | 89.31    | 0.02       | 0.34                | 88.72    |            |                     |          |

| Racial/Ethnic Group | Size    | Model 1    |                     |          | Model 2    |                     |          | Model 3    |                     |          |
|---------------------|---------|------------|---------------------|----------|------------|---------------------|----------|------------|---------------------|----------|
|                     |         | Mean Error | Mean Absolute Error | Coverage | Mean Error | Mean Absolute Error | Coverage | Mean Error | Mean Absolute Error | Coverage |
| NH API              | 10      | -0.87      | 0.87                | 100.00   | -0.68      | 0.92                | 100.00   |            |                     |          |
|                     | 100     | -0.83      | 0.85                | 100.00   | -0.58      | 0.95                | 100.00   |            |                     |          |
|                     | 1000    | -0.53      | 0.64                | 98.68    | -0.26      | 0.76                | 97.79    |            |                     |          |
|                     | 3000    | -0.33      | 0.47                | 98.09    | -0.14      | 0.58                | 97.94    |            |                     |          |
|                     | 5000    | -0.28      | 0.53                | 96.76    | -0.04      | 0.60                | 95.59    |            |                     |          |
|                     | 10 000  | -0.16      | 0.44                | 96.32    | -0.06      | 0.44                | 97.06    |            |                     |          |
|                     | 25 000  | -0.06      | 0.35                | 95.88    | 0.00       | 0.35                | 96.18    |            |                     |          |
|                     | 100 000 | -0.01      | 0.26                | 90.29    | 0.00       | 0.25                | 92.65    |            |                     |          |
| NH Black            | 10      | 0.39       | 1.22                | 92.84    | 1.52       | 2.24                | 84.58    |            |                     |          |
|                     | 100     | 0.37       | 1.19                | 93.04    | 1.36       | 2.09                | 84.58    |            |                     |          |
|                     | 1000    | 0.35       | 1.00                | 91.98    | 0.88       | 1.42                | 84.82    |            |                     |          |
|                     | 3000    | 0.18       | 0.80                | 91.94    | 0.48       | 0.97                | 87.89    |            |                     |          |
|                     | 5000    | 0.17       | 0.69                | 91.65    | 0.36       | 0.80                | 88.81    |            |                     |          |
|                     | 10 000  | 0.05       | 0.58                | 91.73    | 0.15       | 0.62                | 90.83    |            |                     |          |
|                     | 25 000  | 0.02       | 0.44                | 90.41    | 0.06       | 0.45                | 91.14    |            |                     |          |
|                     | 100 000 | 0.00       | 0.30                | 85.83    | 0.01       | 0.30                | 86.68    |            |                     |          |
| NH White            | 10      | 0.09       | 0.64                | 97.22    | -0.89      | 1.13                | 93.86    |            |                     |          |
|                     | 100     | 0.09       | 0.64                | 96.97    | -0.80      | 1.08                | 92.96    |            |                     |          |
|                     | 1000    | 0.04       | 0.61                | 95.59    | -0.50      | 0.83                | 91.88    |            |                     |          |
|                     | 3000    | -0.03      | 0.51                | 93.57    | -0.36      | 0.65                | 90.51    |            |                     |          |
|                     | 5000    | 0.00       | 0.48                | 92.28    | -0.24      | 0.55                | 90.60    |            |                     |          |
|                     | 10 000  | -0.05      | 0.39                | 92.22    | -0.20      | 0.45                | 90.42    |            |                     |          |
|                     | 25 000  | -0.02      | 0.31                | 90.84    | -0.09      | 0.33                | 90.48    |            |                     |          |
|                     | 100 000 | -0.01      | 0.22                | 85.63    | -0.02      | 0.22                | 86.20    |            |                     |          |

\*“Across all racial/ethnic groups” indicates that errors and coverage were calculated across all racial/ethnic groups for models 1 and 2, while “All racial/ethnic groups combined” refers to model 3, where the data were aggregated across racial/ethnic groups before fitting models.

# 4 Supplemental Methods Figures

## 4.1 Analysis flow chart

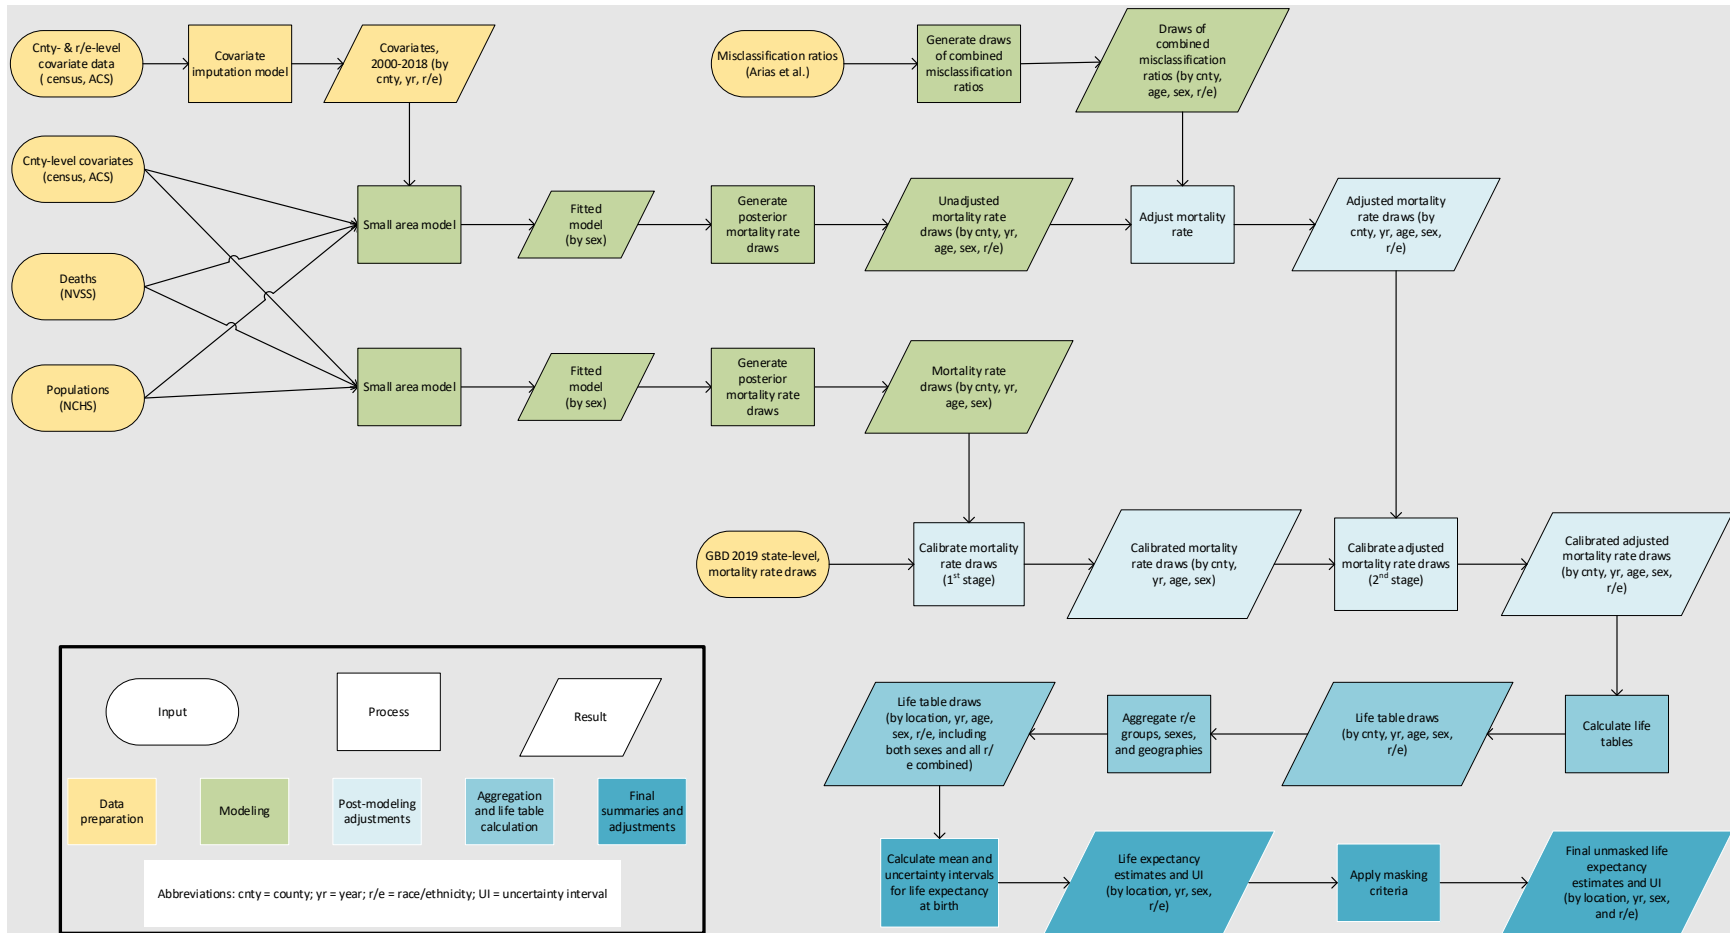

## 4.2 Hyper-prior sensitivity analysis results

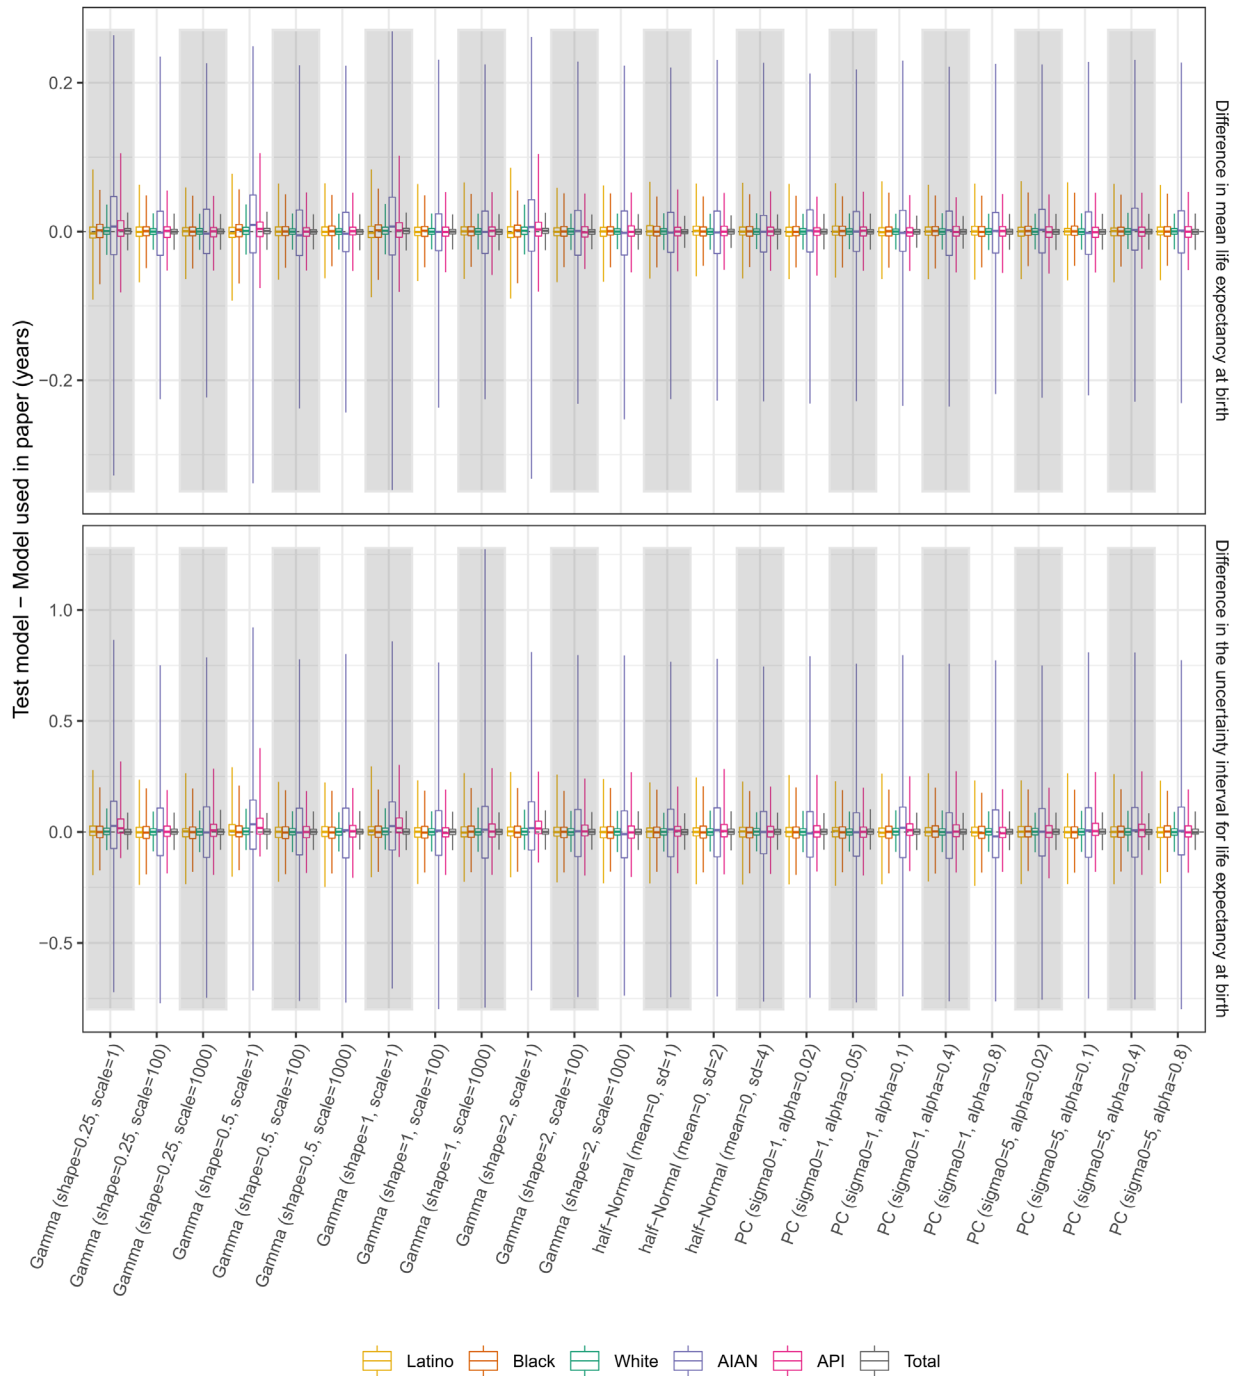

County-race/ethnicity-level, population-weighted summary of differences in life expectancy at birth for males and females combined in 2000, 2010, and 2019 compared to that of the model used in this paper (penalized complexity models,  $\sigma_0 = 5, \alpha = 0.05$ ). Boxes show the IQR, while the whiskers extend to 1<sup>st</sup> and 99<sup>th</sup> percentiles, weighted by the average population across all years in each county-race/ethnicity. The data shown are for both masked and unmasked data. The comparison shown here for the “Total”

group is from the county-level model, while the comparison for all other groups is from the county-race/ethnicity model.



### 4.3 Model validation results

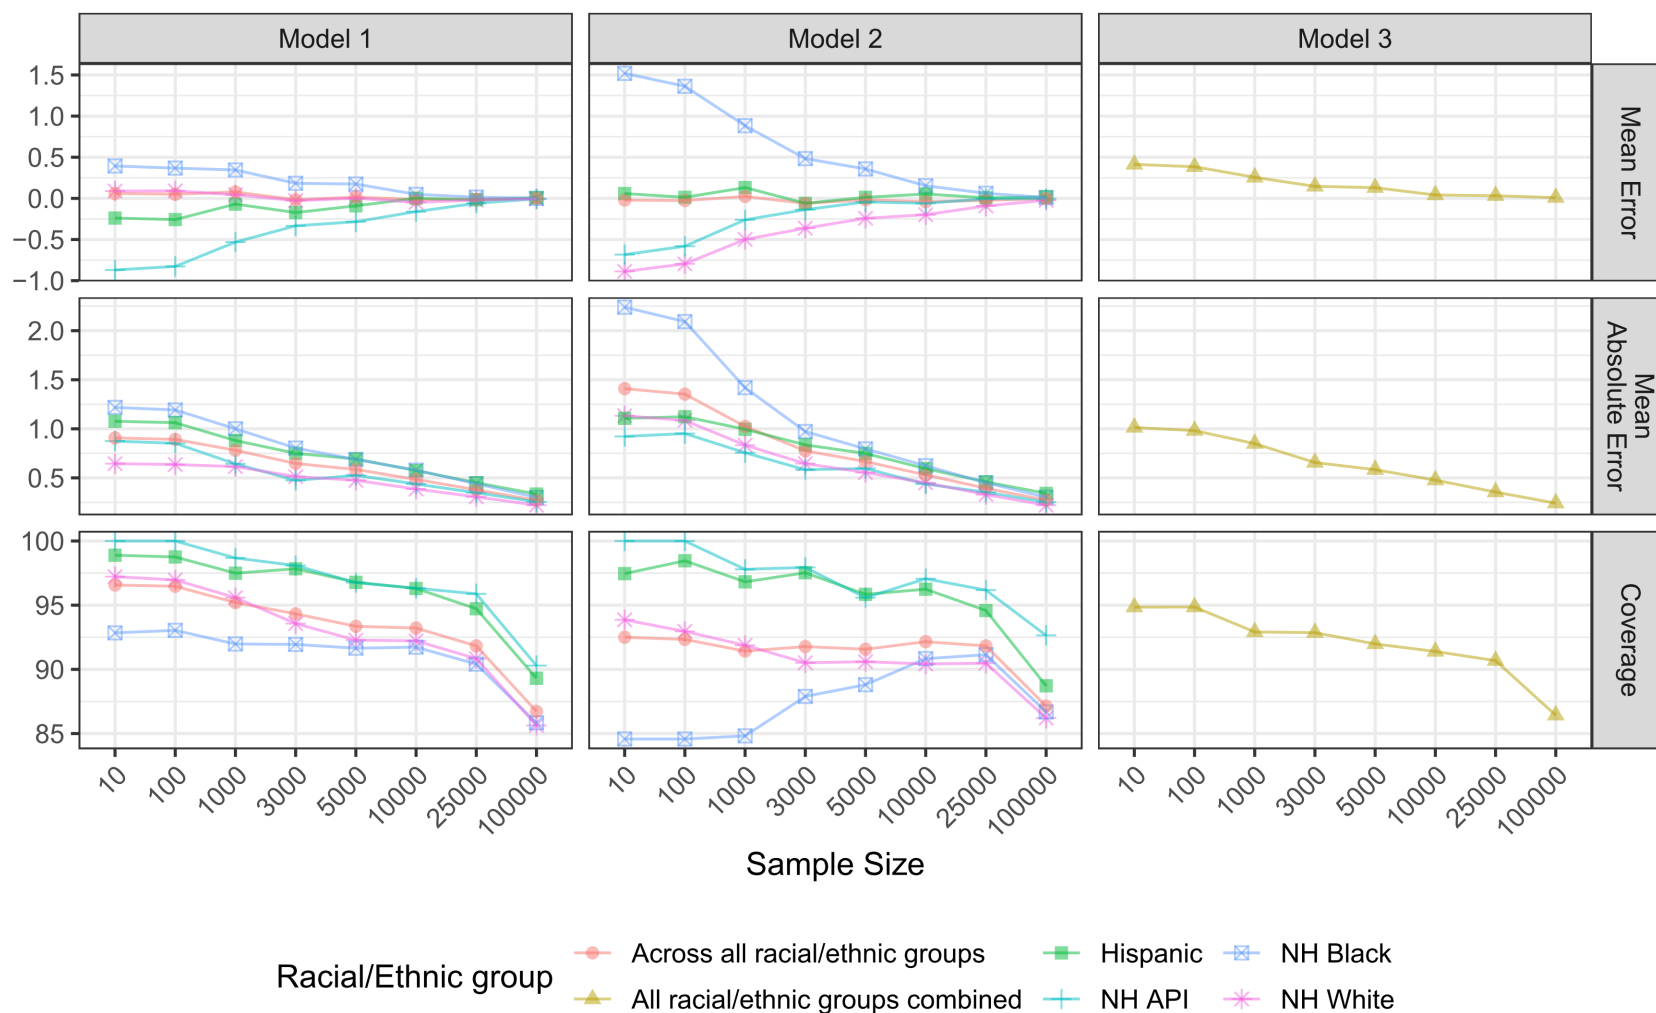

\*“Across all racial/ethnic groups” means that errors and coverage were calculated across all racial/ethnic group for models 2 and 3, while “All racial/ethnic groups combined” refers to model 3, where the data were aggregated across racial/ethnic groups before fitting models.

#### 4.4 Impact of misclassification adjustment on national life expectancy estimates

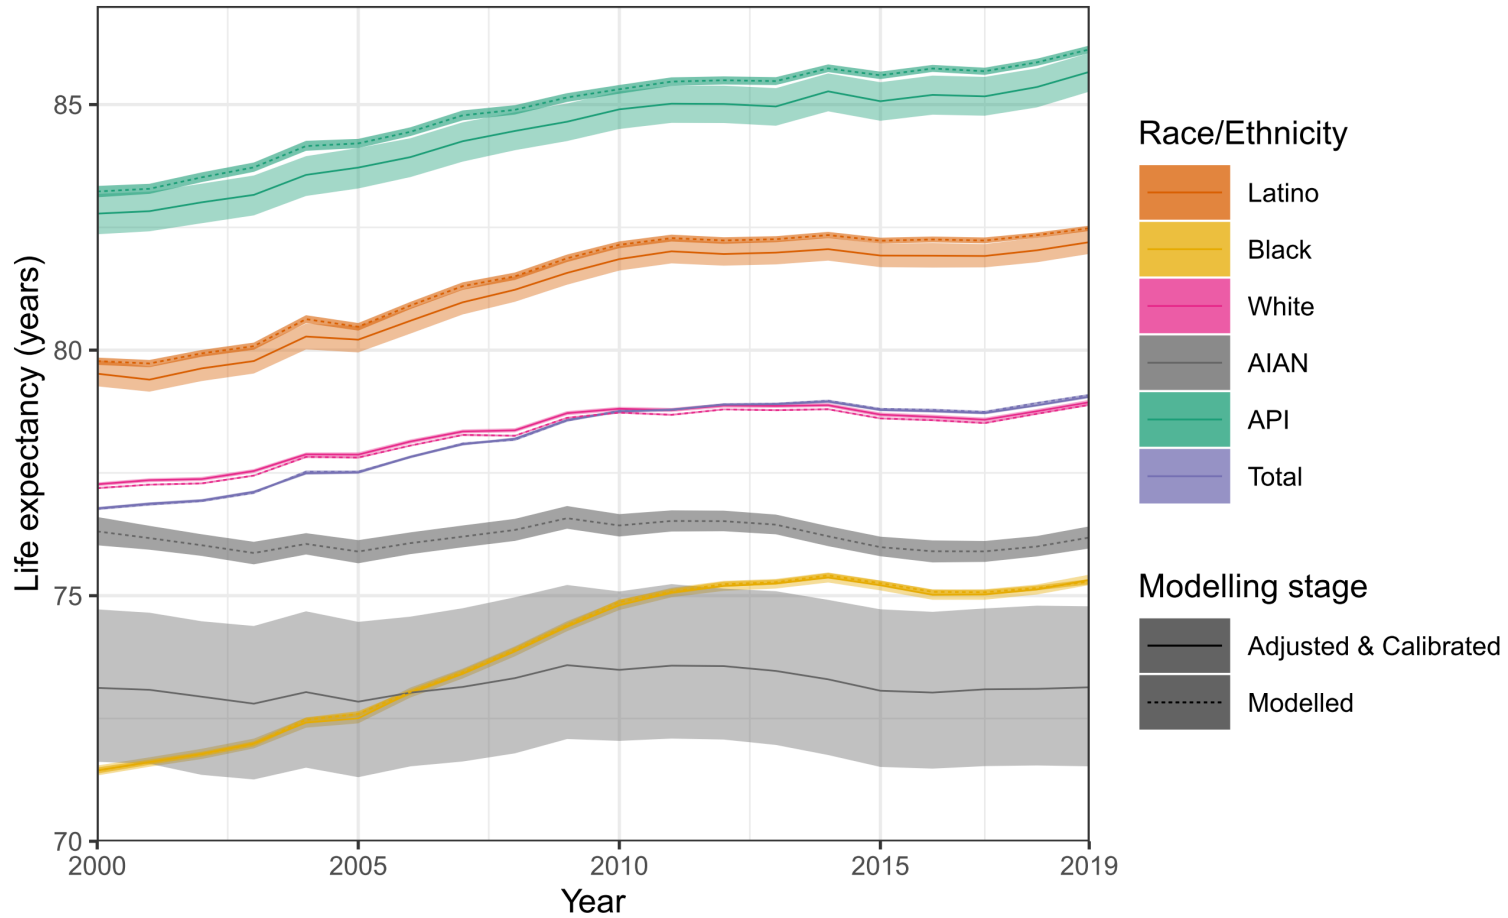

National life expectancy estimates before adjustment for misclassification (“Modelled”) and after adjustment and calibration (“Adjusted & Calibrated”), ie, the final estimates.

#### 4.5 Impact of misclassification adjustment on county life expectancy estimates

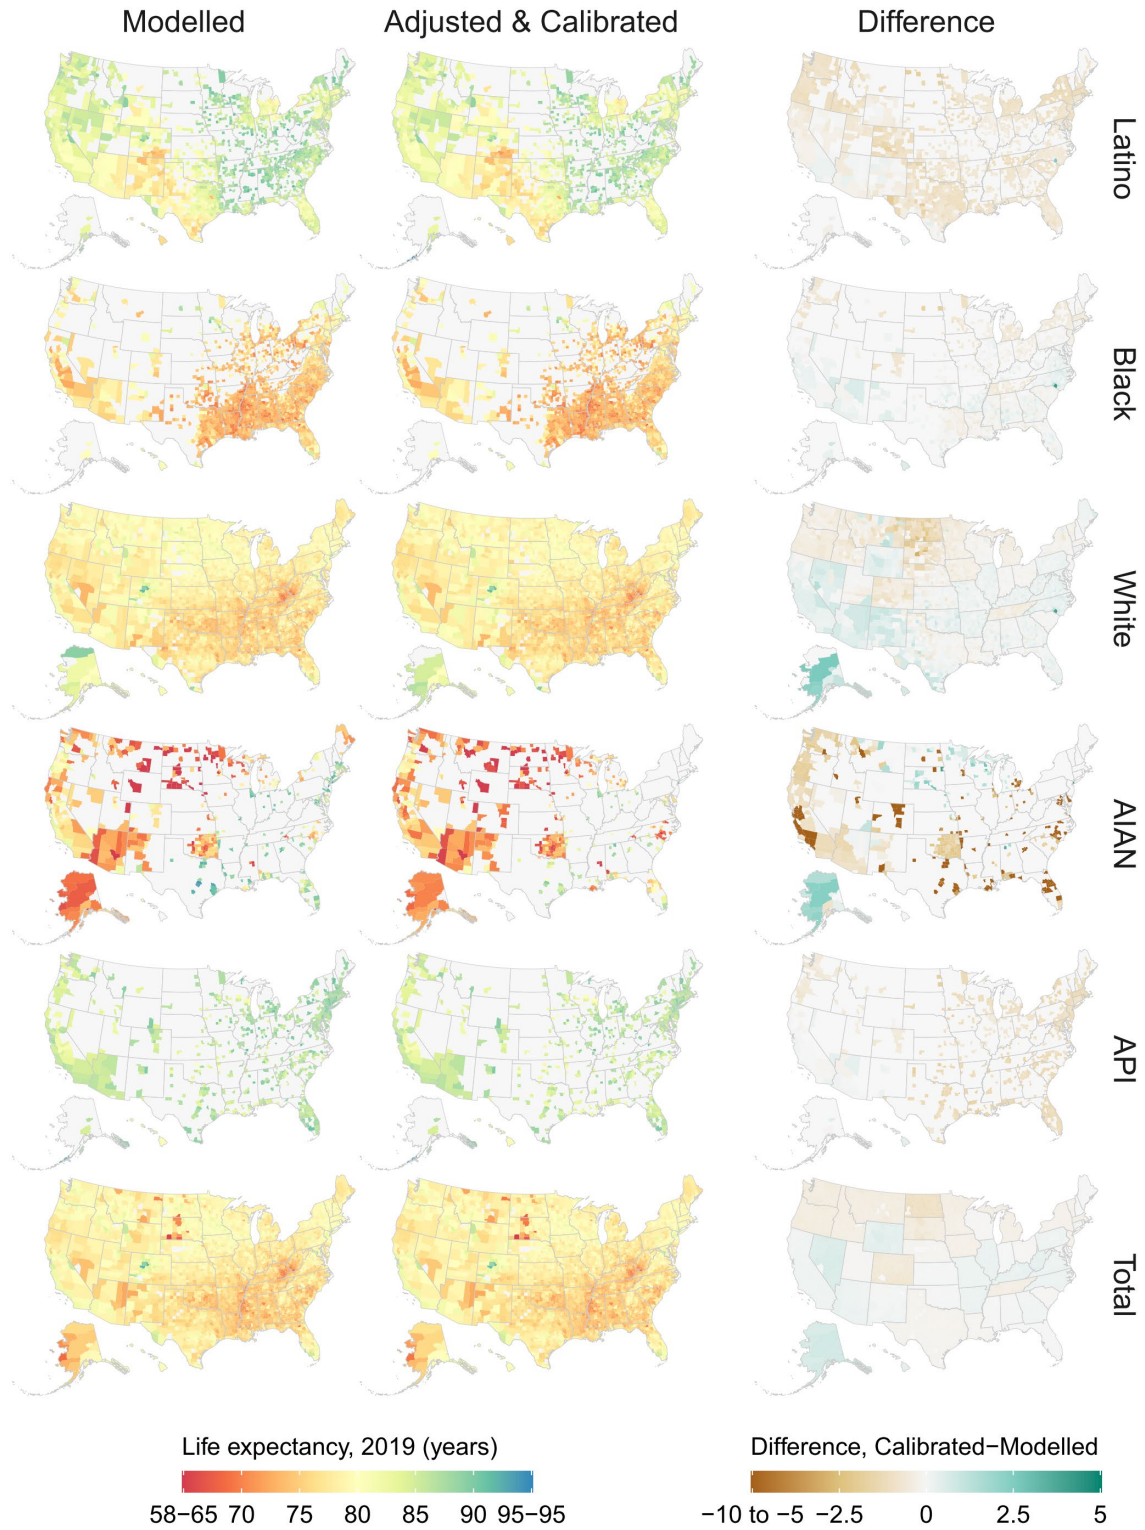

County life expectancy estimates before adjustment for misclassification (“Modelled”) and after adjustment and calibration (“Adjusted & Calibrated”), ie, the final estimates.

# 5 Supplemental Results Figures

## 5.1 County life expectancy by racial/ethnic group, 2000

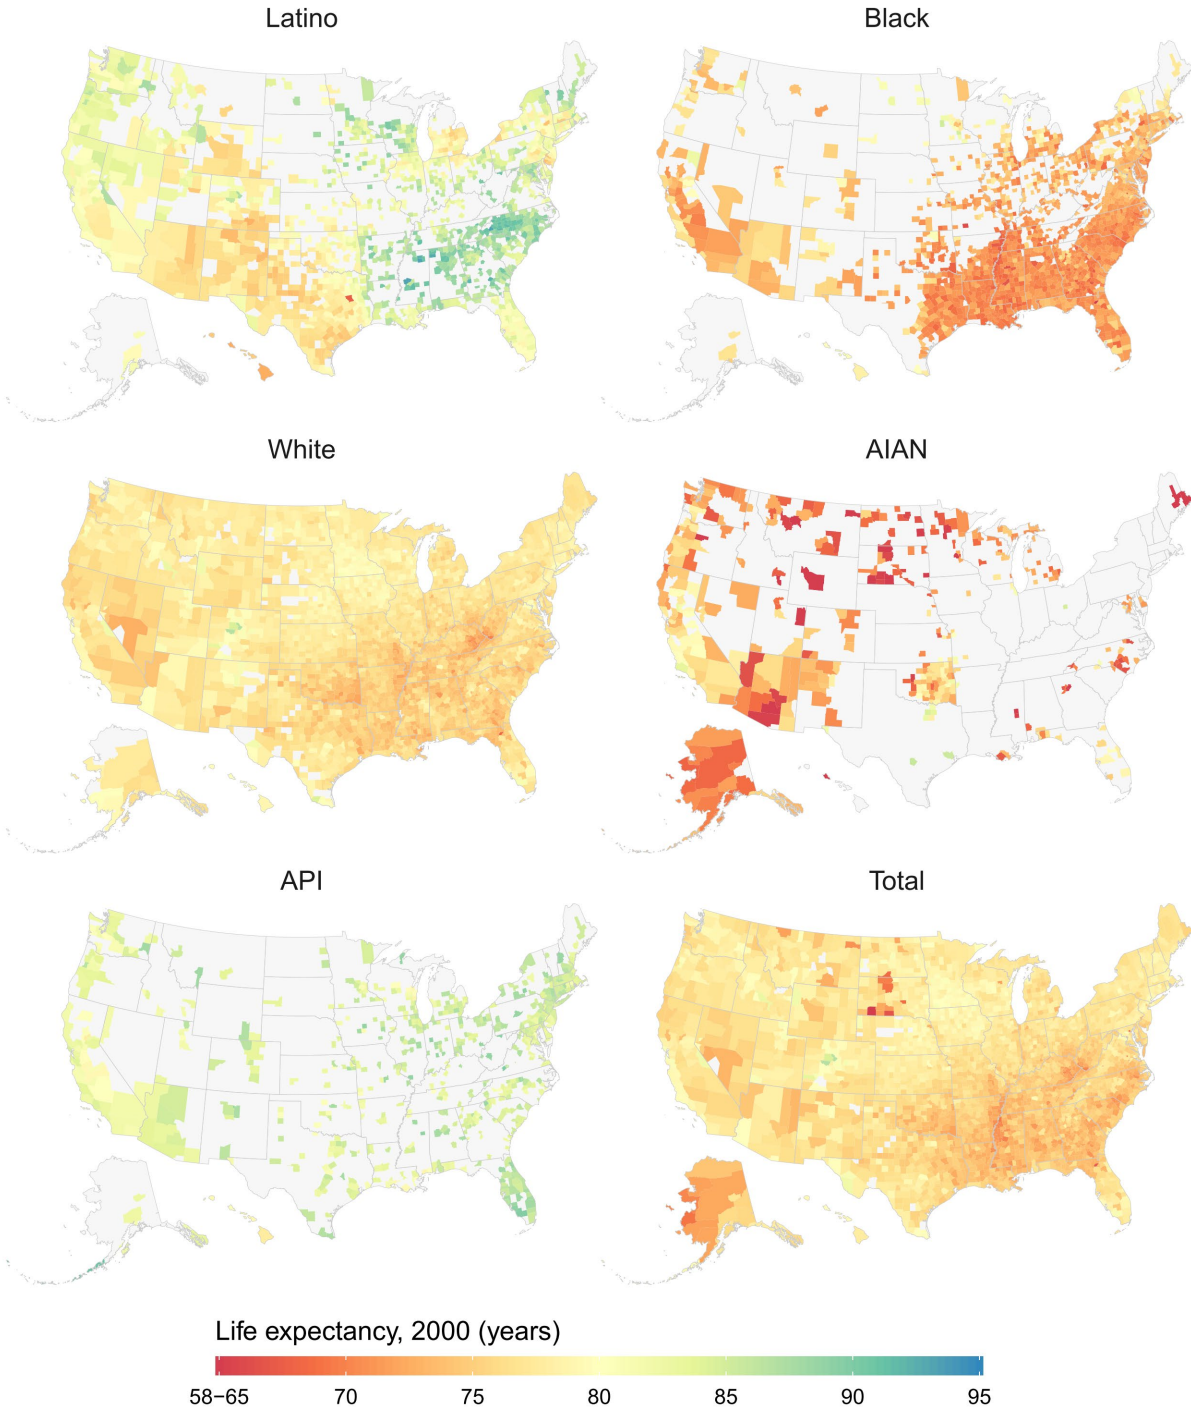

County life expectancy at birth by racial/ethnic group in 2000. The colour scale is truncated at 65 and 95 years, as indicated by the ranges in the legend. Estimates of life expectancy in county-racial/ethnic group

combinations with an average annual population less than 1000 people and/or estimates with an uncertainty interval width greater than ten years are masked and depicted here in grey.



## 5.2 County life expectancy by racial/ethnic group, 2010

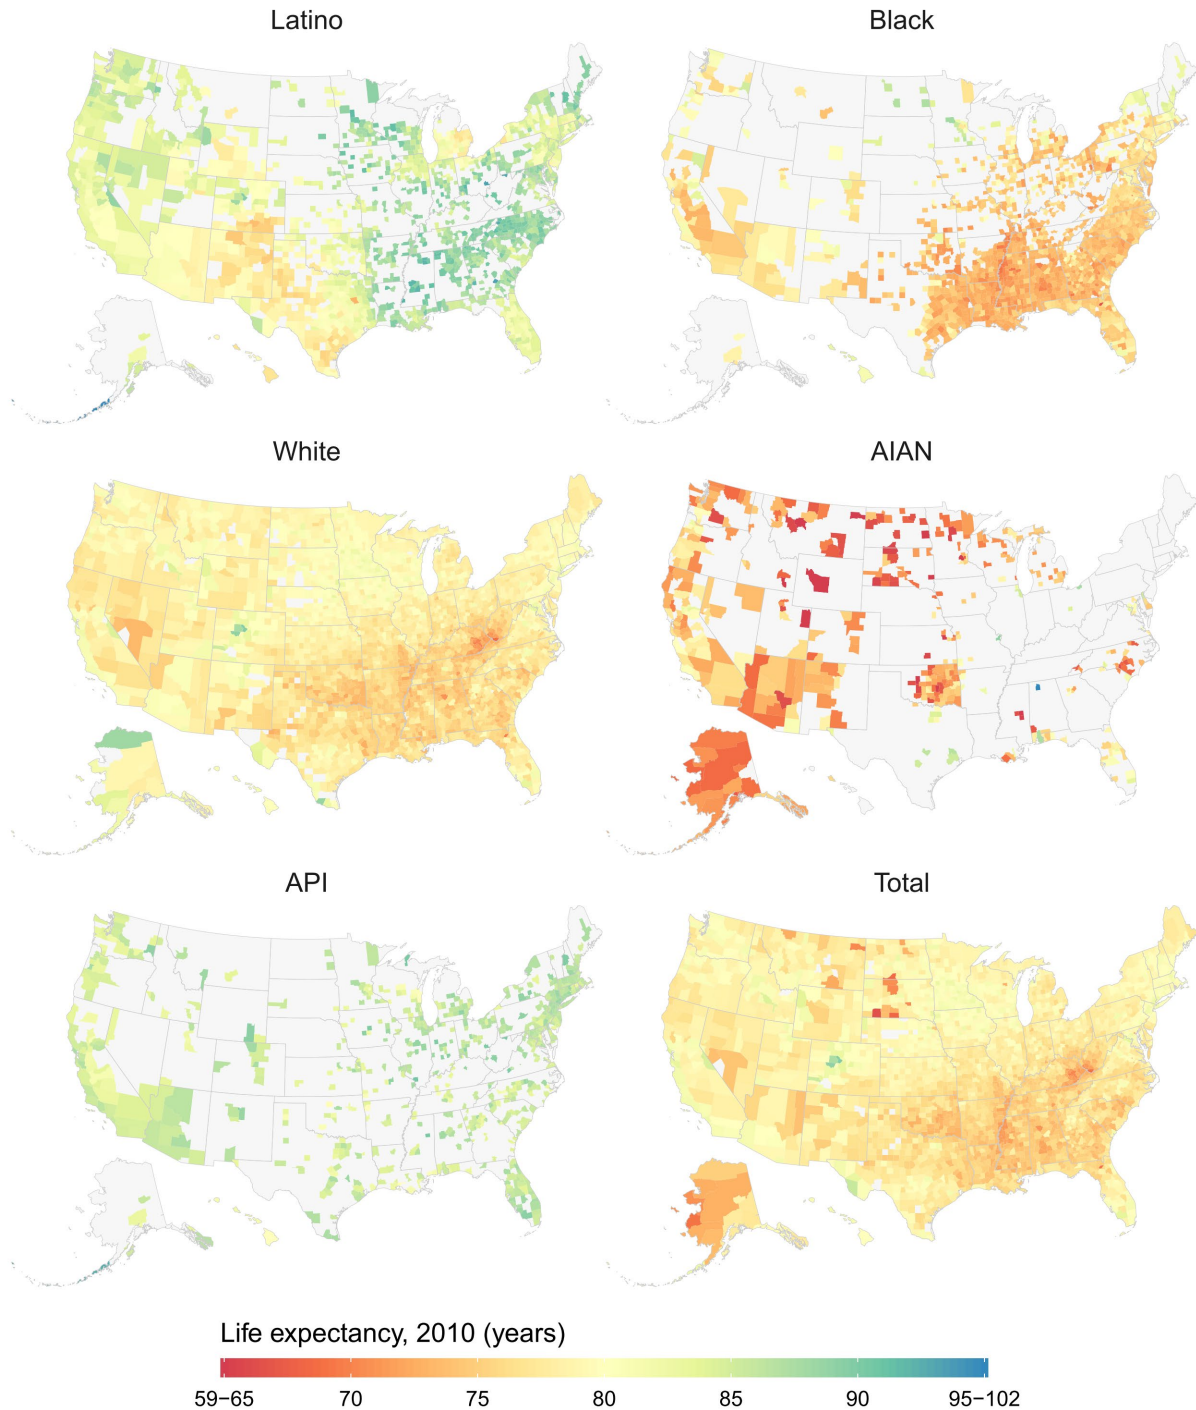

County life expectancy at birth by racial/ethnic group in 2010. The colour scale is truncated at 65 and 95 years, as indicated by the ranges in the legend. Estimates of life expectancy in county-racial/ethnic group combinations with an average annual population less than 1000 people and/or estimates with an uncertainty interval width greater than ten years are masked and depicted here in grey.

### 5.3 Differences in county life expectancy among racial/ethnic groups compared to the White population, 2000

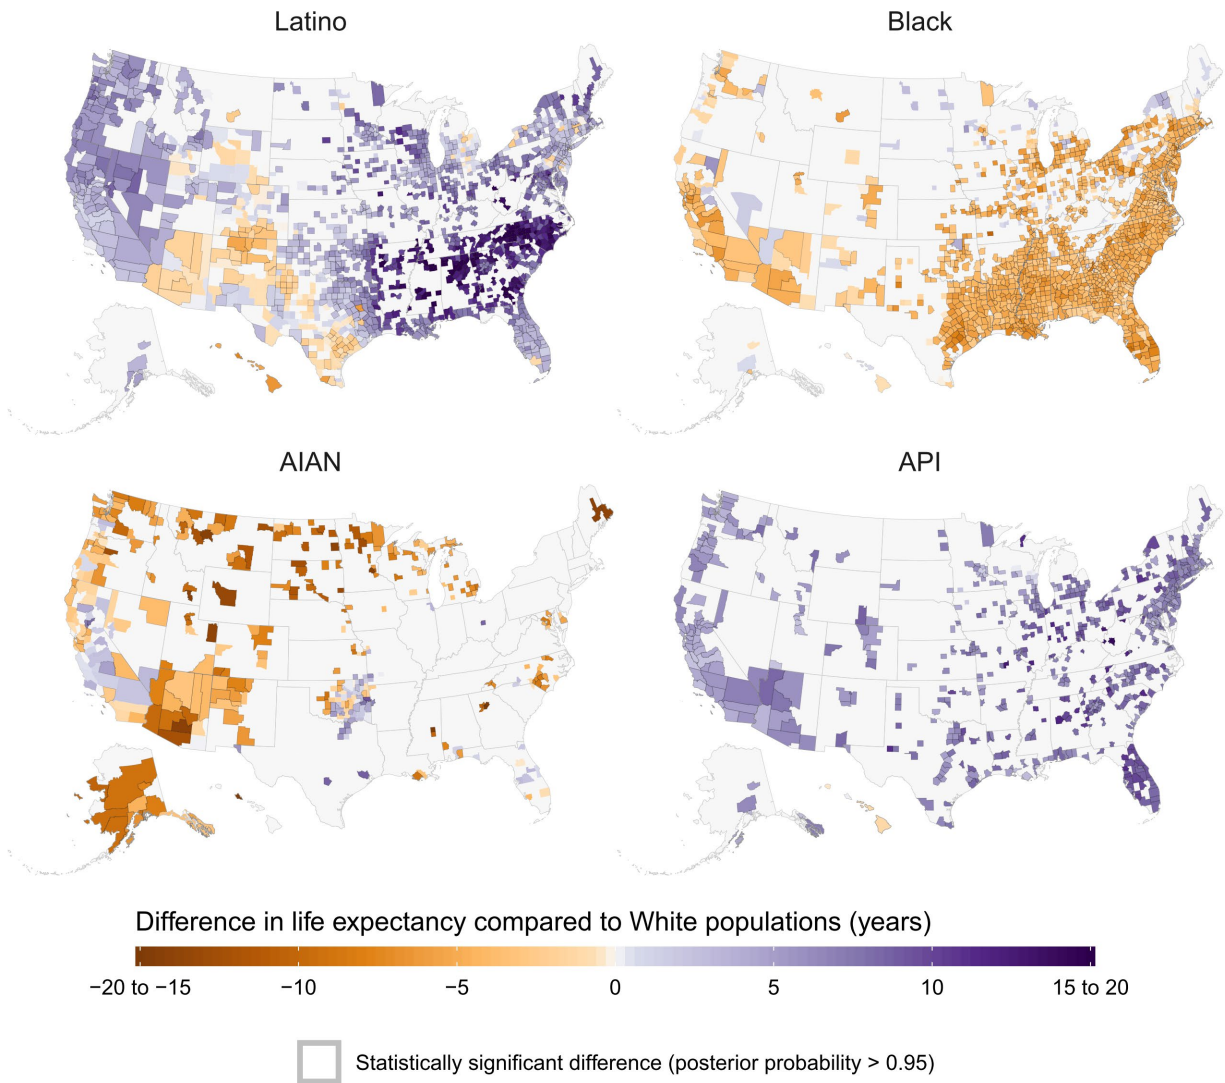

Absolute difference in county life expectancy at birth by racial/ethnic group in 2000, relative to life expectancy for the White population in the same county. The colour scale is truncated at -15 and 15 years, as indicated by the ranges in the legend. Grey boundaries around a county indicate an estimated difference in life expectancy that is statistically significant. Estimates of life expectancy in county-racial/ethnic group combinations with an average annual population less than 1000 people and/or estimates with an uncertainty interval width greater than ten years are masked and depicted here in grey.

5.4 Differences in county life expectancy among racial/ethnic groups compared to the White population, 2010

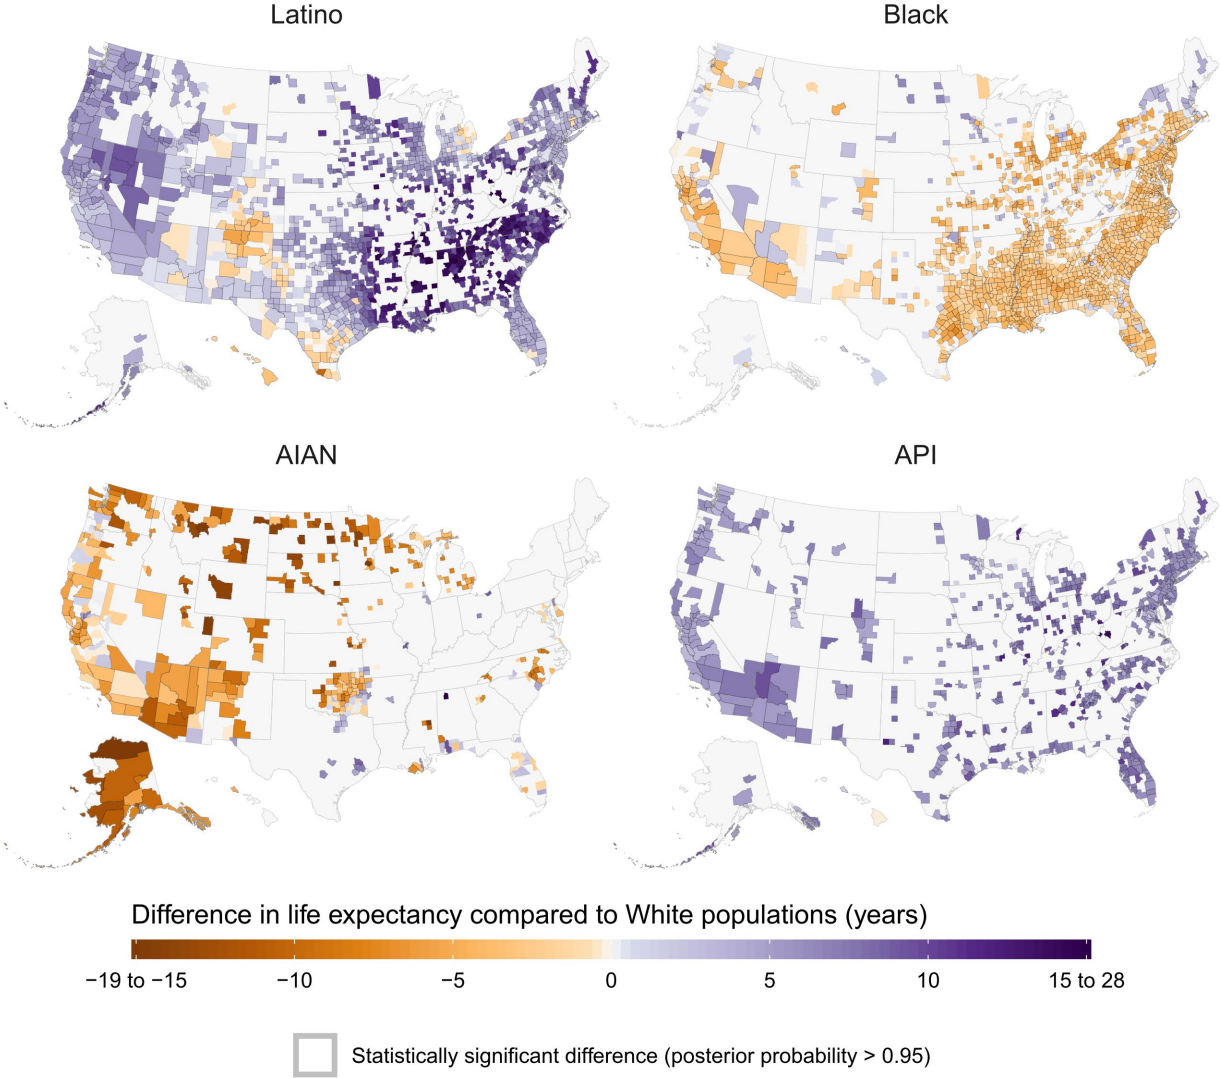

Absolute difference in county life expectancy at birth by racial/ethnic group in 2010, relative to life expectancy for the White population in the same county. The colour scale is truncated at -15 and 15 years, as indicated by the ranges in the legend. Grey boundaries around a county indicate an estimated difference in life expectancy that is statistically significant. Estimates of life expectancy in county-racial/ethnic group combinations with an average annual population less than 1000 people and/or estimates with an uncertainty interval width greater than ten years are masked and depicted here in grey.



### 5.5 Change in county life expectancy by racial/ethnic group, 2000–2010

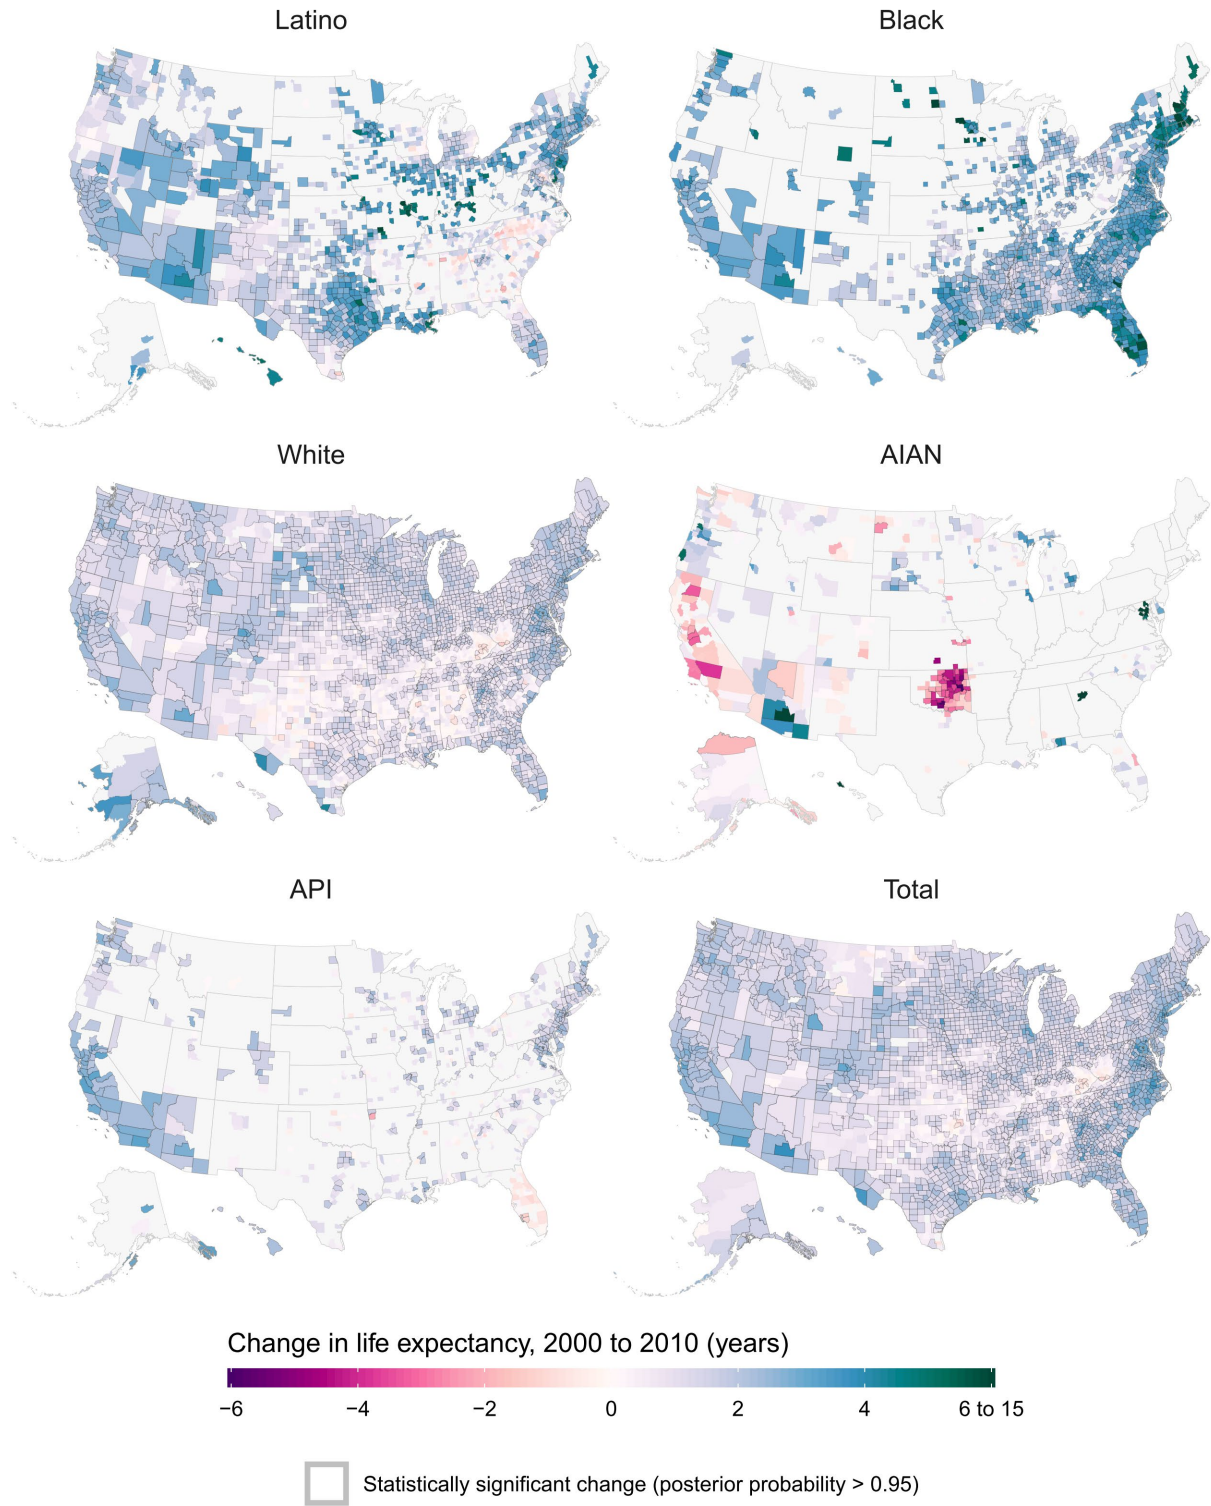

Absolute change in county life expectancy at birth from 2000 to 2010 by racial ethnic group. The colour scale is truncated at an absolute difference of -6 and 6 years, as indicated by the ranges in the legend.

Grey boundaries around a county indicate an estimated change in life expectancy that is statistically significant. Estimates of life expectancy in county-racial/ethnic group combinations with an average annual population less than 1000 people and/or estimates with an uncertainty interval width greater than ten years are masked and depicted here in grey.

## 5.6 Change in county life expectancy by racial/ethnic group, 2010–2019

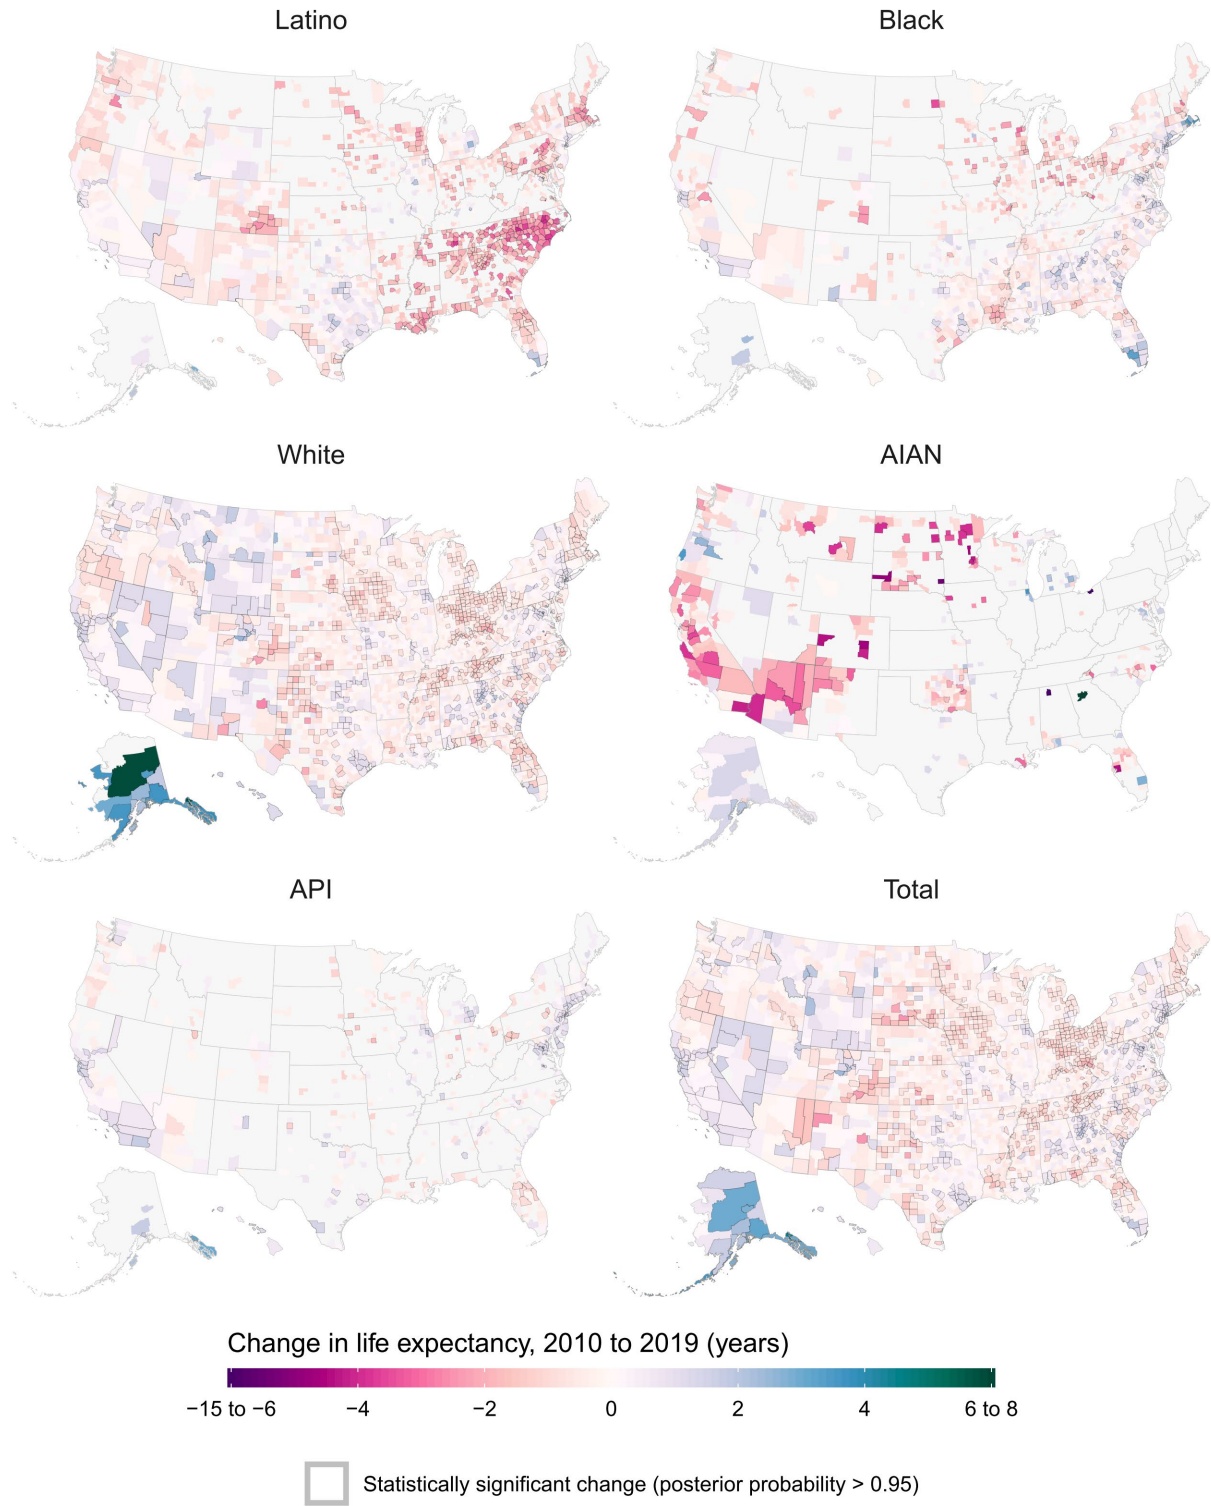

Absolute change in county life expectancy at birth from 2010 to 2019 by racial ethnic group. The colour scale is truncated at an absolute difference of -6 and 6 years, as indicated by the ranges in the legend.

Grey boundaries around a county indicate an estimated change in life expectancy that is statistically significant. Estimates of life expectancy in county-racial/ethnic group combinations with an average annual population less than 1000 people and/or estimates with an uncertainty interval width greater than ten years are masked and depicted here in grey.

## 5.7 Change in county life expectancy by racial/ethnic group compared to the White population, 2000–2010

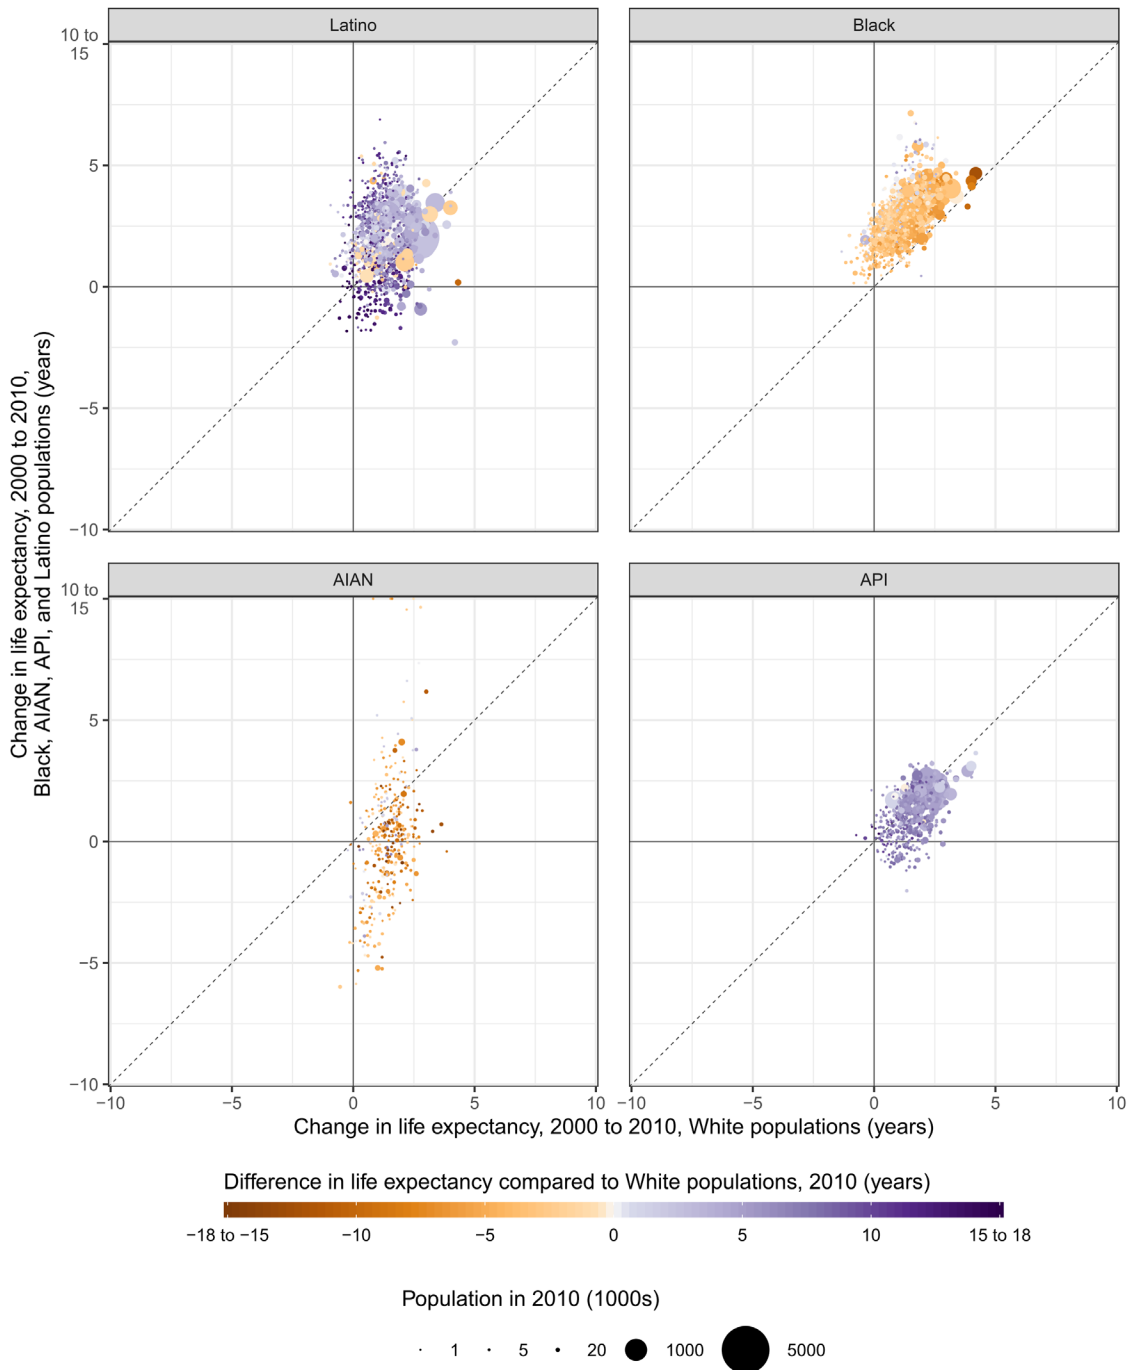

Absolute change in county life expectancy at birth from 2000 to 2010 for each racial ethnic group compared to this same change for the White population in the same county. Each point corresponds to a county, the colour of each point indicates the difference in life expectancy in this county in 2010 between the racial/ethnic group specified in the panel title and the White population, and the size of the point

indicates the population in this county in 2010 for the racial/ethnic group specified. The axes are truncated at –10 and ten years, as indicated by the axis labels and the colour scale is truncated at –15 and 15 years, as indicated by the ranges in the legend. Estimates of life expectancy in county-racial/ethnic group combinations with an average annual population less than 1000 people and/or estimates with an uncertainty interval width greater than ten years are not displayed.

## 5.8 Change in county life expectancy by racial/ethnic group compared to the White population, 2010–2019

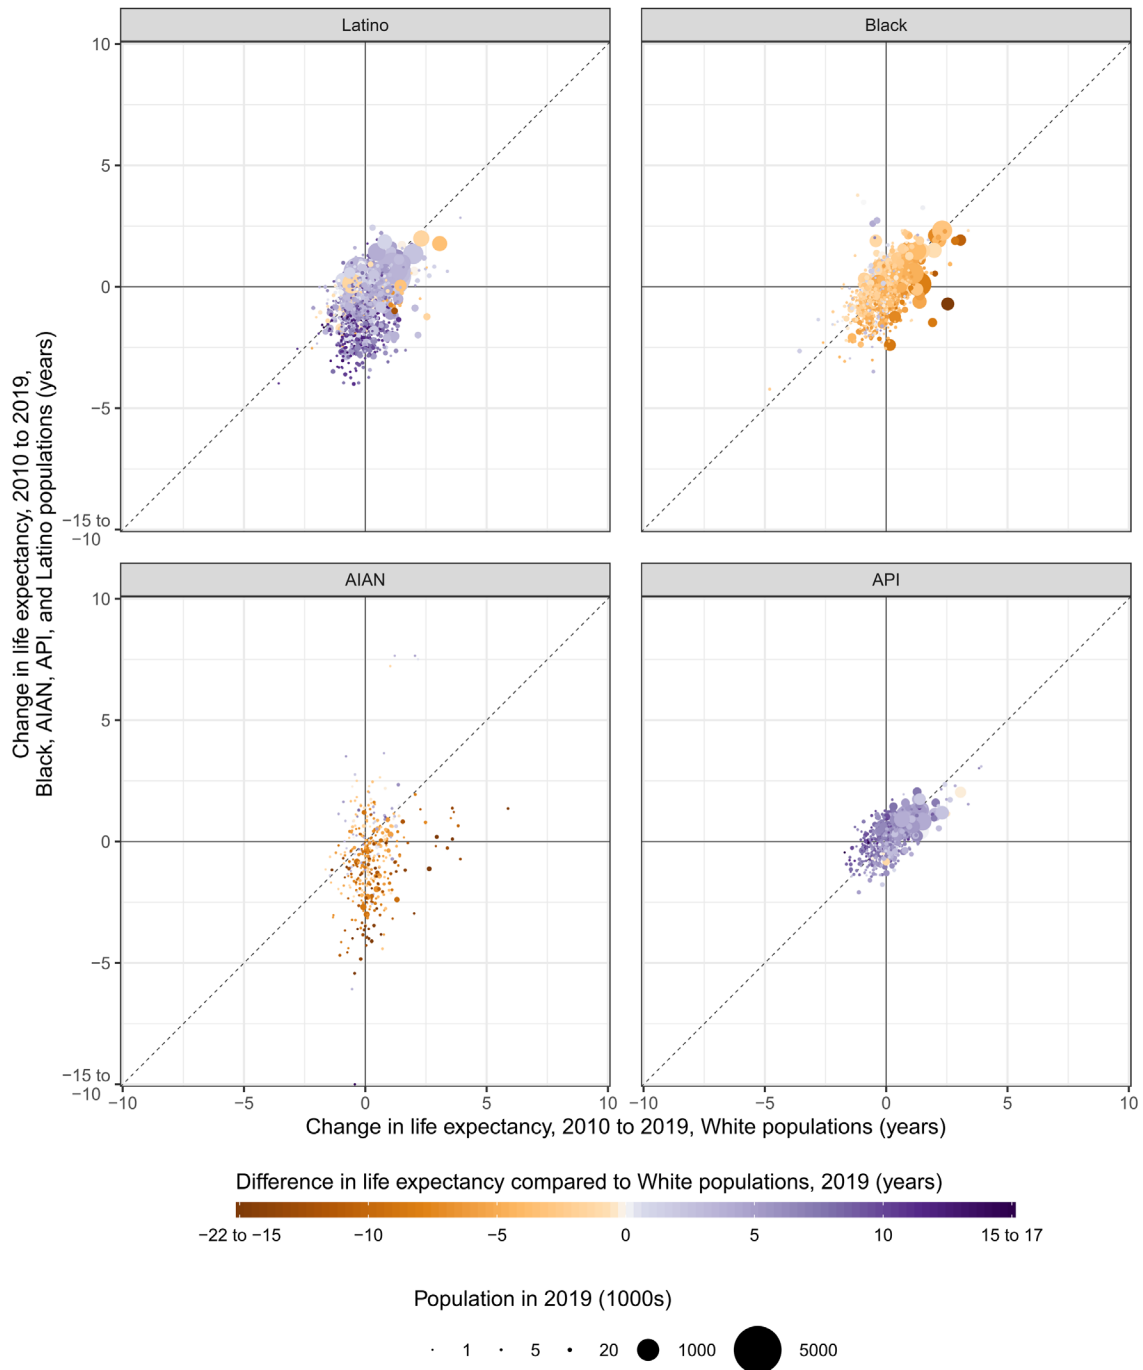

Absolute change in county life expectancy at birth from 2010 to 2019 for each racial ethnic group compared to this same change for the White population in the same county. Each point corresponds to a county, the colour of each point indicates the difference in life expectancy in this county in 2019 between the racial/ethnic group specified in the panel title and the White population, and the size of the point

indicates the population in this county in 2019 for the racial/ethnic group specified. The axes are truncated at –10 and 10 years, as indicated by the axis labels and the colour scale is truncated at –15 and 15 years, as indicated by the ranges in the legend. Estimates of life expectancy in county-racial/ethnic group combinations with an average annual population less than 1000 people and/or estimates with an uncertainty interval width greater than ten years are not displayed.



### 5.9 Change in differences in county life expectancy among racial/ethnic groups compared to the White population, 2000–2010

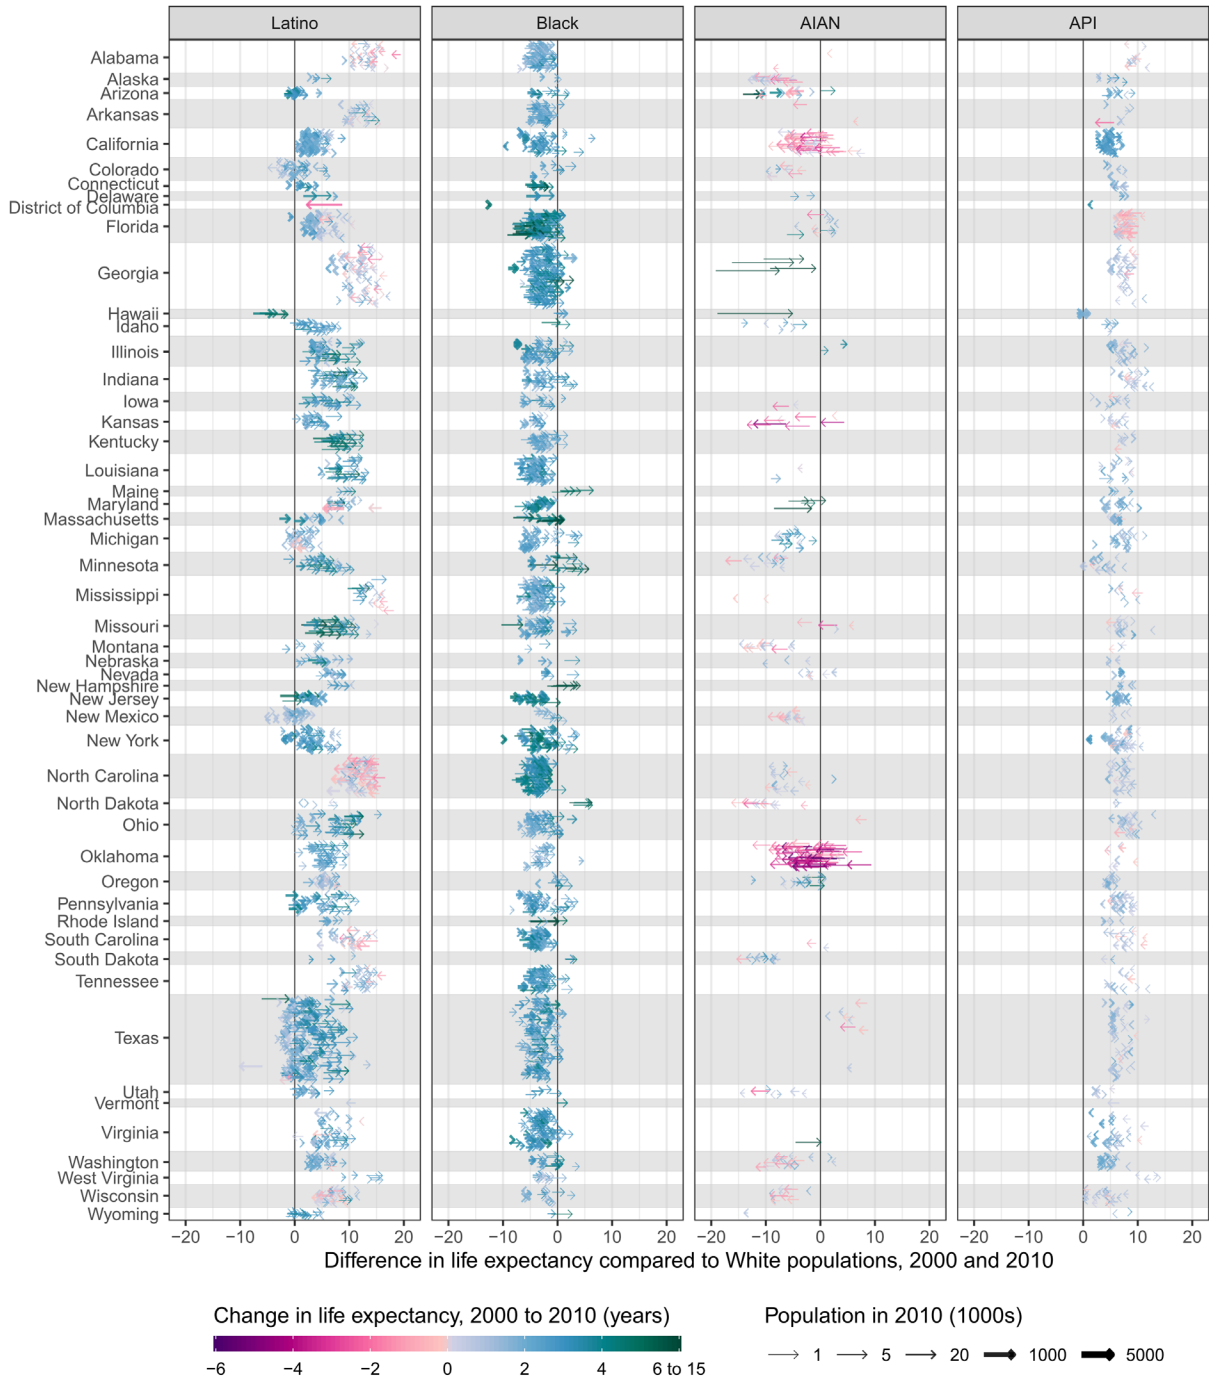

Absolute difference in county life expectancy at birth by racial/ethnic group in 2000 and 2010, relative to life expectancy for the White population in the same county. Each arrow corresponds to a county and the arrow starts at the difference in life expectancy between the racial/ethnic group specified in the panel title and the White population in that county in 2000 and ends at the same quantity in 2010. The colour

of each arrow indicates the change in life expectancy over this period in a given county for the specified racial/ethnic group, and the size of the arrow indicates the population of this racial/ethnic group in 2010. The colour scale is truncated at an absolute difference of -6 and 6 years, as indicated by the ranges in the legend. Estimates of life expectancy in county-racial/ethnic group combinations with an average annual population less than 1000 people and/or estimates with an uncertainty interval width greater than ten years are not displayed.

## 5.10 Change in differences in county life expectancy among racial/ethnic groups compared to the White population, 2010–2019

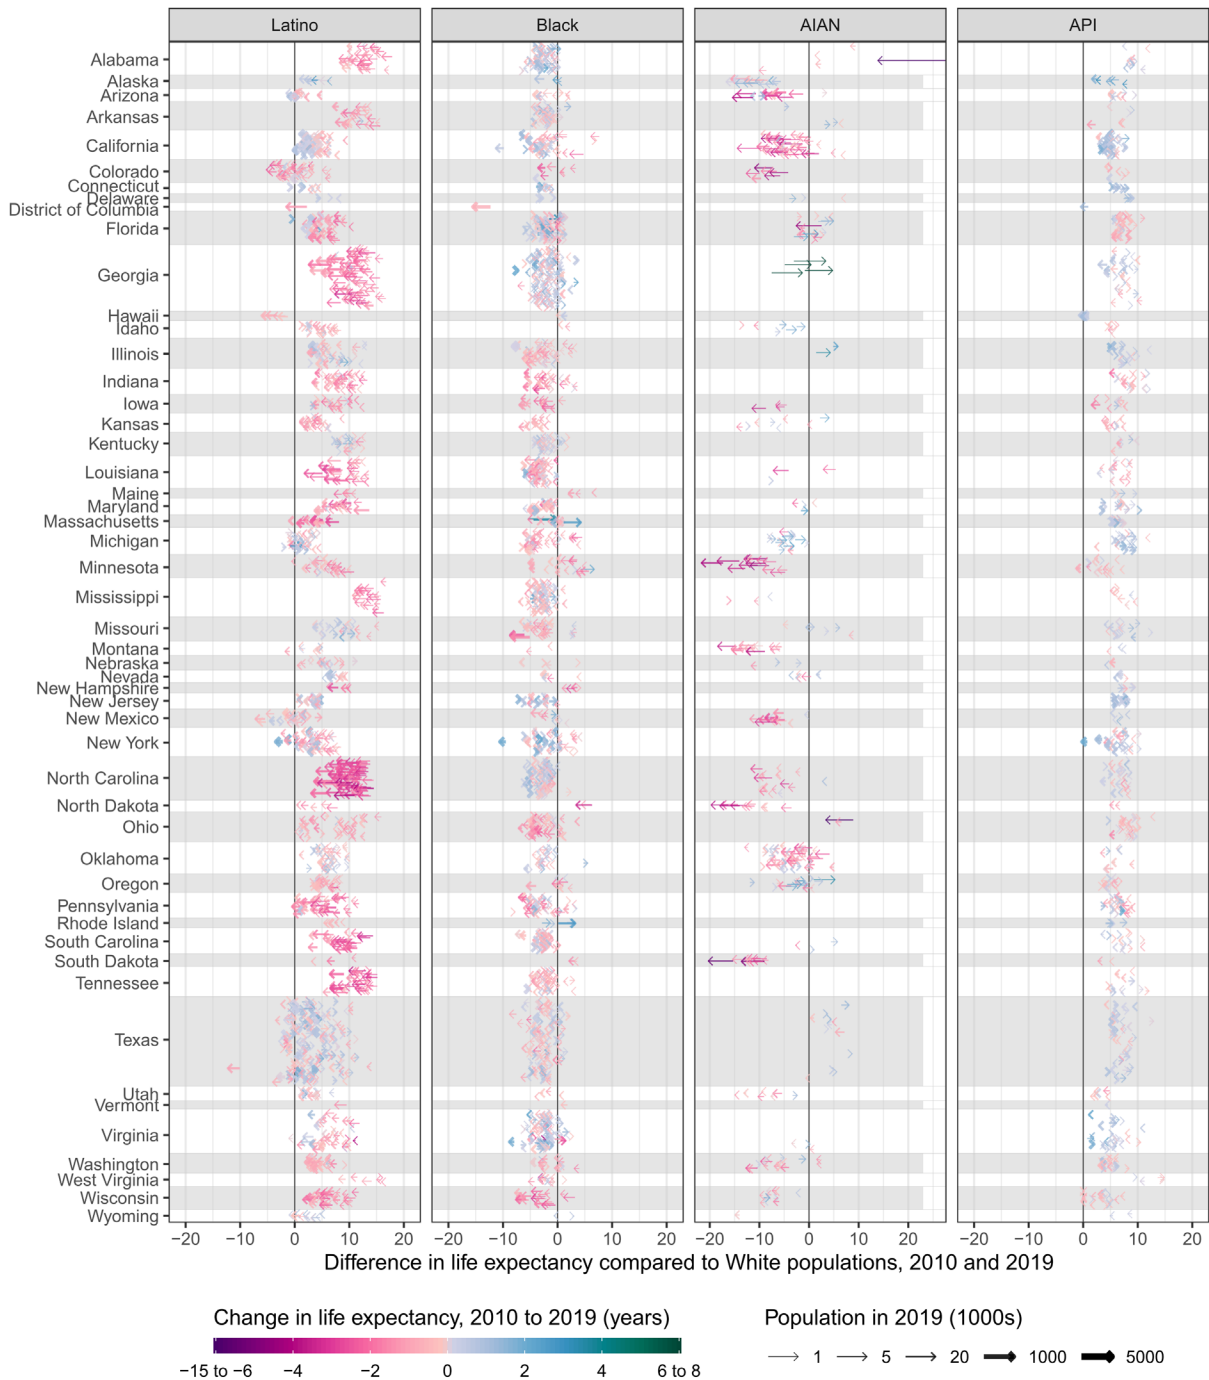

Absolute difference in county life expectancy at birth by racial/ethnic group in 2010 and 2019, relative to life expectancy for the White population in the same county. Each arrow corresponds to a county and the arrow starts at the difference in life expectancy between the racial/ethnic group specified in the panel title and the White population in that county in 2010 and ends at the same quantity in 2019. The colour

of each arrow indicates the change in life expectancy over this period in a given county for the specified racial/ethnic group, and the size of the arrow indicates the population of this racial/ethnic group in 2019. The colour scale is truncated at an absolute difference of -6 and 6 years, as indicated by the ranges in the legend. Estimates of life expectancy in county-racial/ethnic group combinations with an average annual population less than 1000 people and/or estimates with an uncertainty interval width greater than ten years are not displayed.

## 5.11 County life expectancy and the composition of the API population

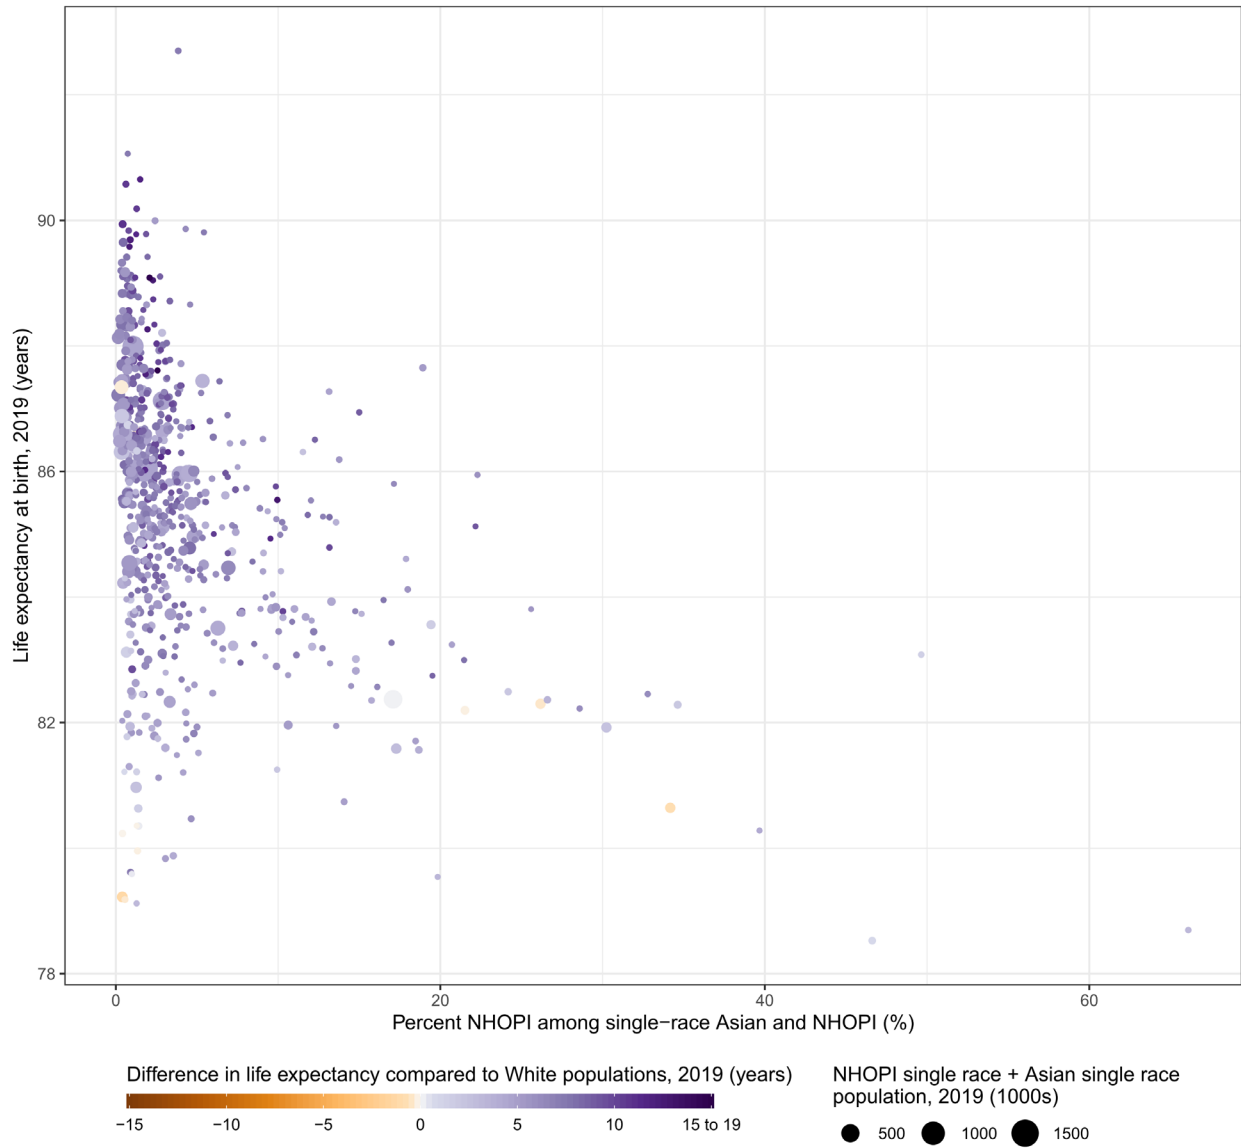

County-level life expectancy at birth in 2019 among the API population versus the proportion of the single-race Asian and NHOPI population that is NHOPI based on county-level population estimates by race and ethnicity from the census bureau. This population proportion excludes multiracial individuals, as population estimates are not available for specific combinations of racial/ethnic groups. Estimates in this paper use a combined API category due to data constraints, but these estimates likely mask differences in life expectancy between Asian and NHOPI populations.
